# Supplementary material for: Functional Classification of Uncultured “Candidatus Caldiarchaeum subterraneum” Using the Maple System
Source: PubMed Central journal article supplement (PMC4510362; doi:10.1371/journal.pone.0132994), 2015-07-21
Supplement: pone.0132994.s001.pdf [file pone.0132994.s001.pdf]

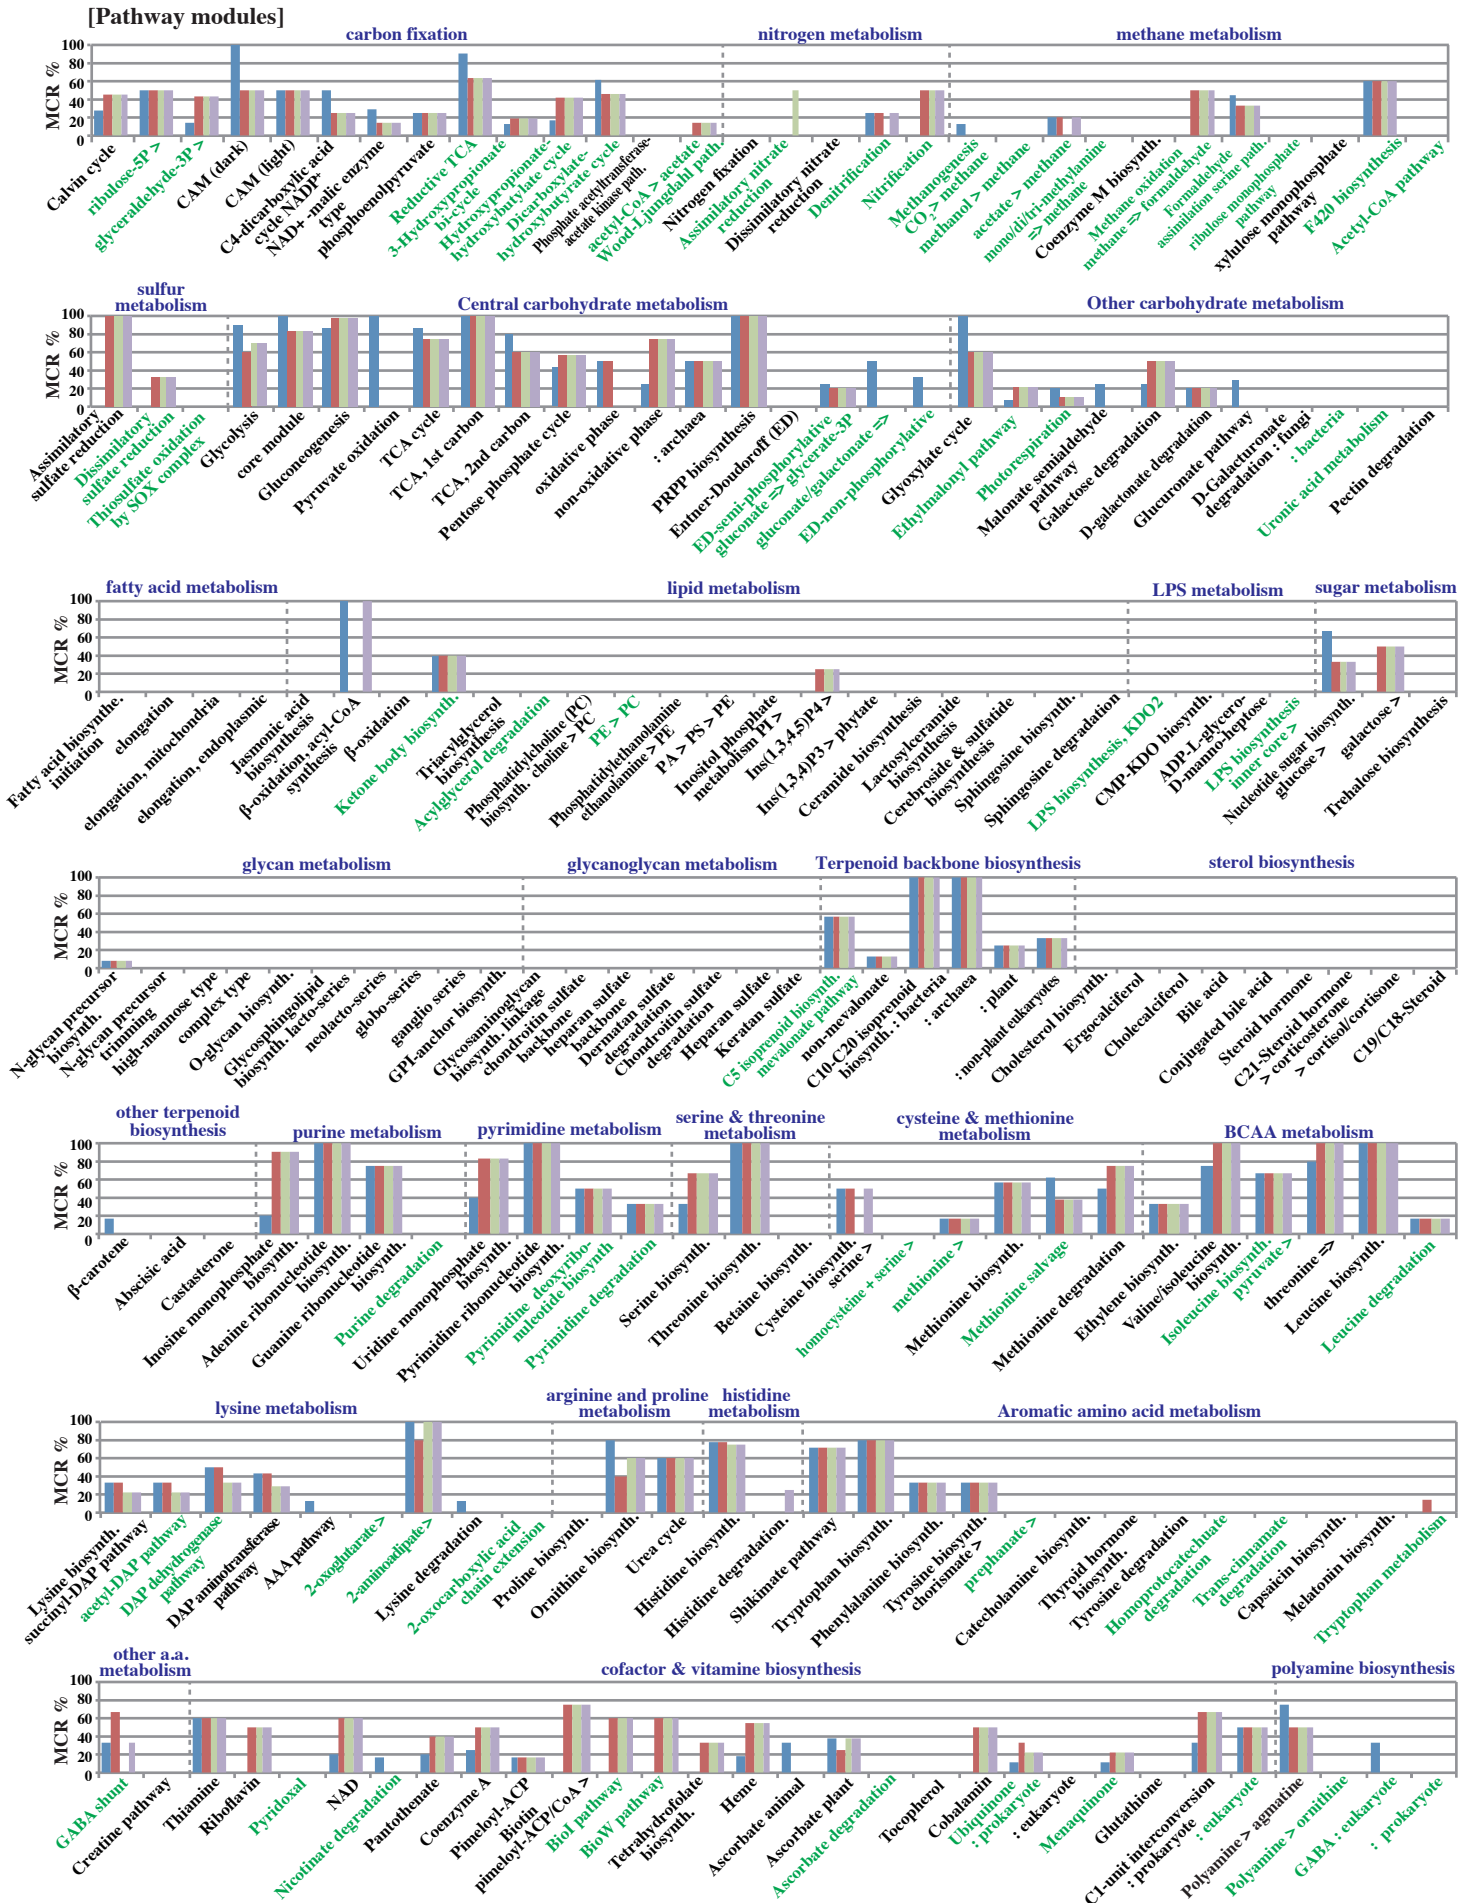

**Figure S1** Comparison of the MCR pattern of uncultured *Ca.* ‘*Caldiarchaeum subterraneum*’ with those of representative species within *Thaumarchaeota*. MCR: module completion ratio, Green shows restricted modules [19], Complete name of each module is described in Table S3. ■, *Ca.* ‘*Caldiarchaeum subterraneum*’; ■, *Ca.* ‘*Nitrososphaera gargensis*’; ■, *Cenarchaeum symbiosum*; ■, *Nitrosopumilus maritimus*

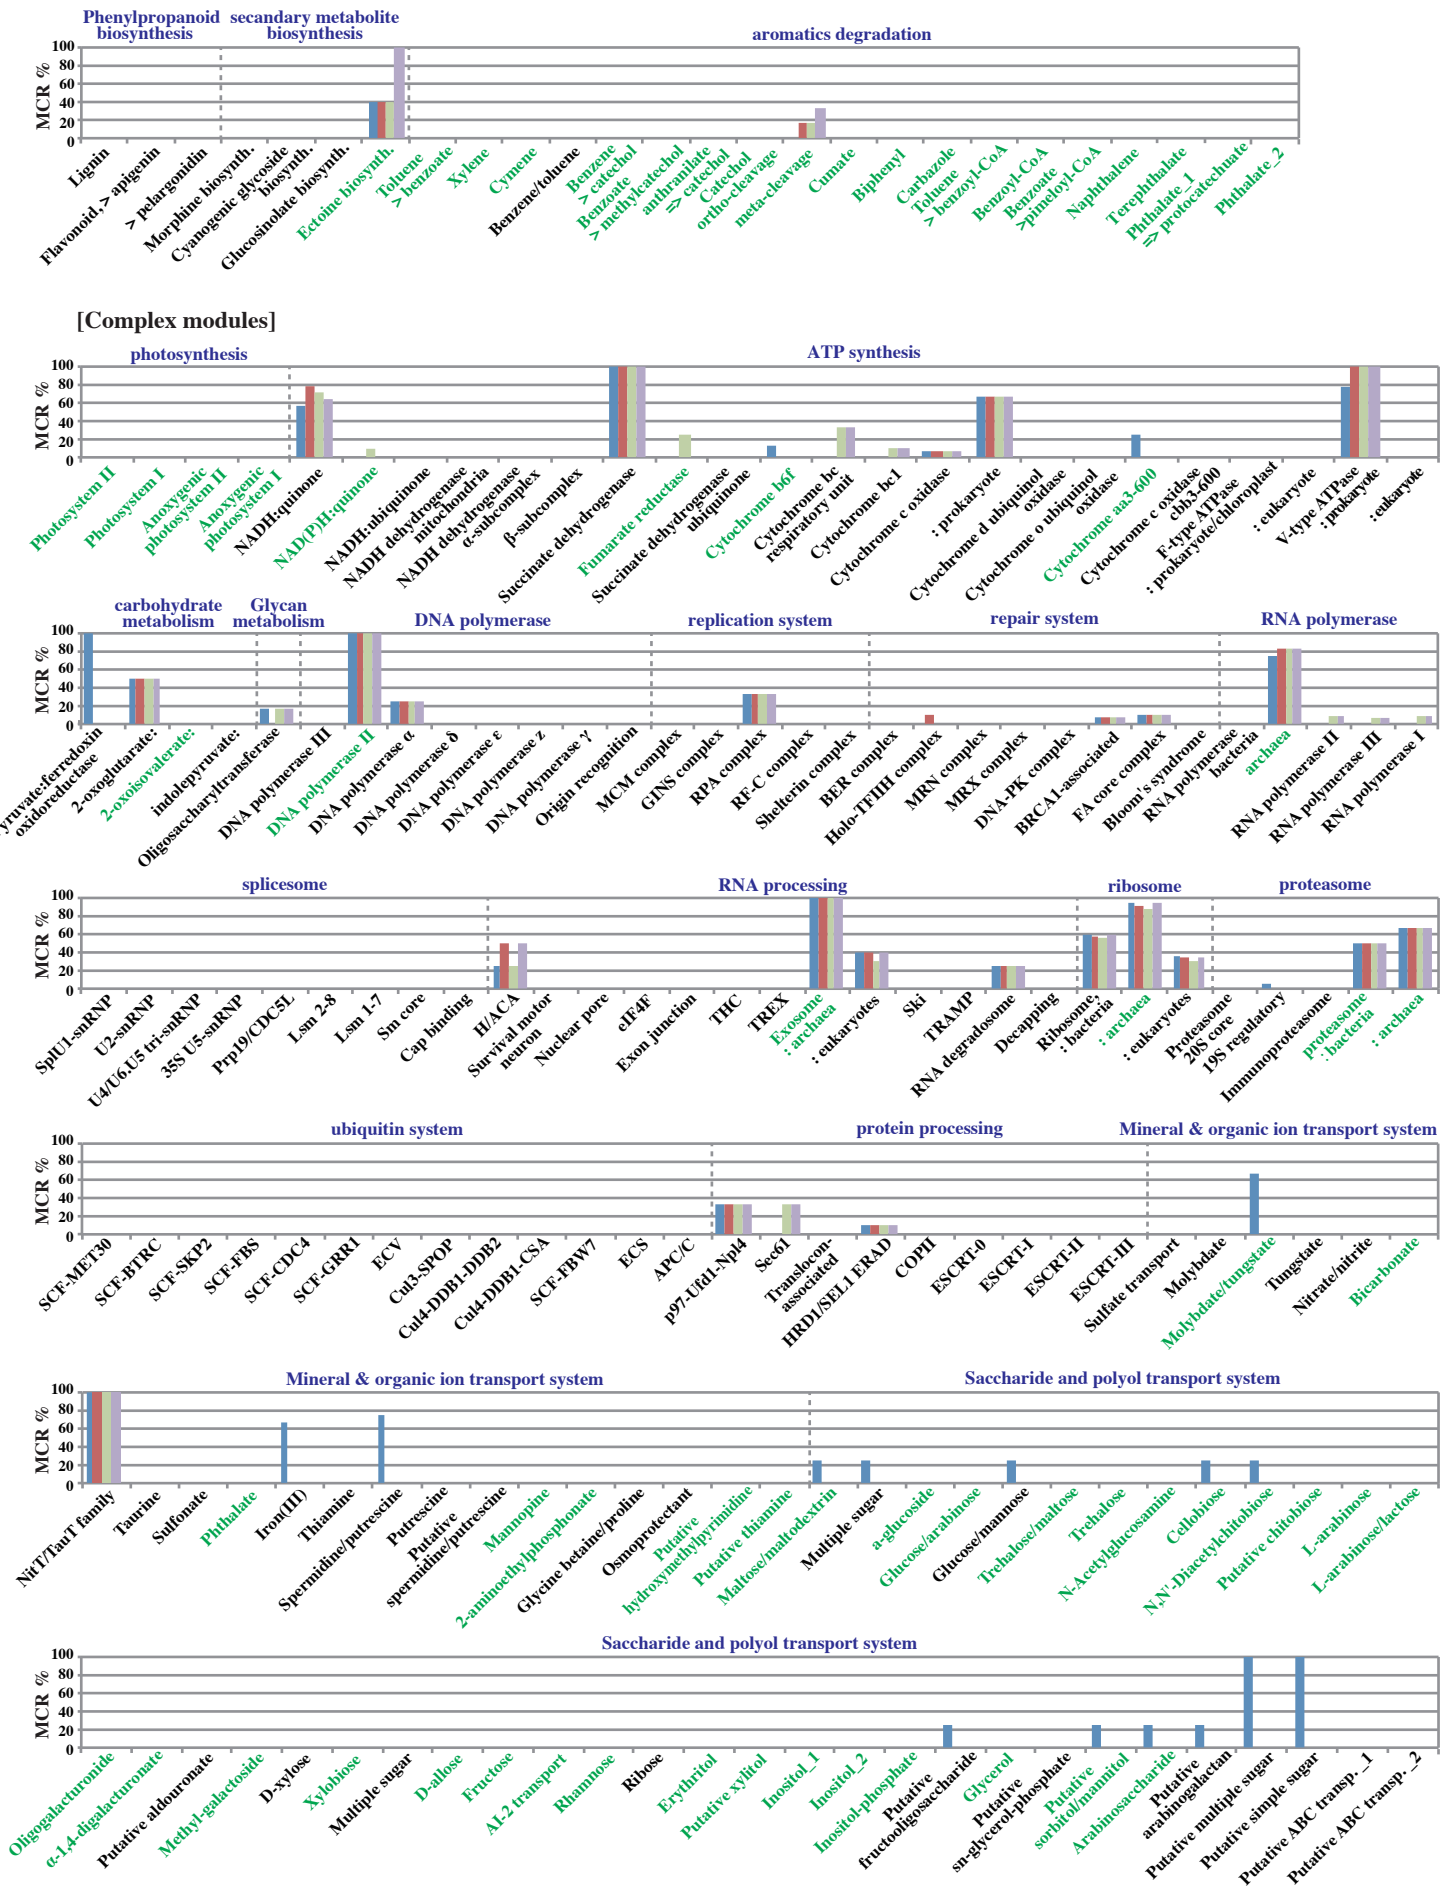

**Figure S1** Comparison of module completion pattern of uncultured Ca. “Caidiarchaeum” with those of representative species within *Thaumarchaeota*. continued

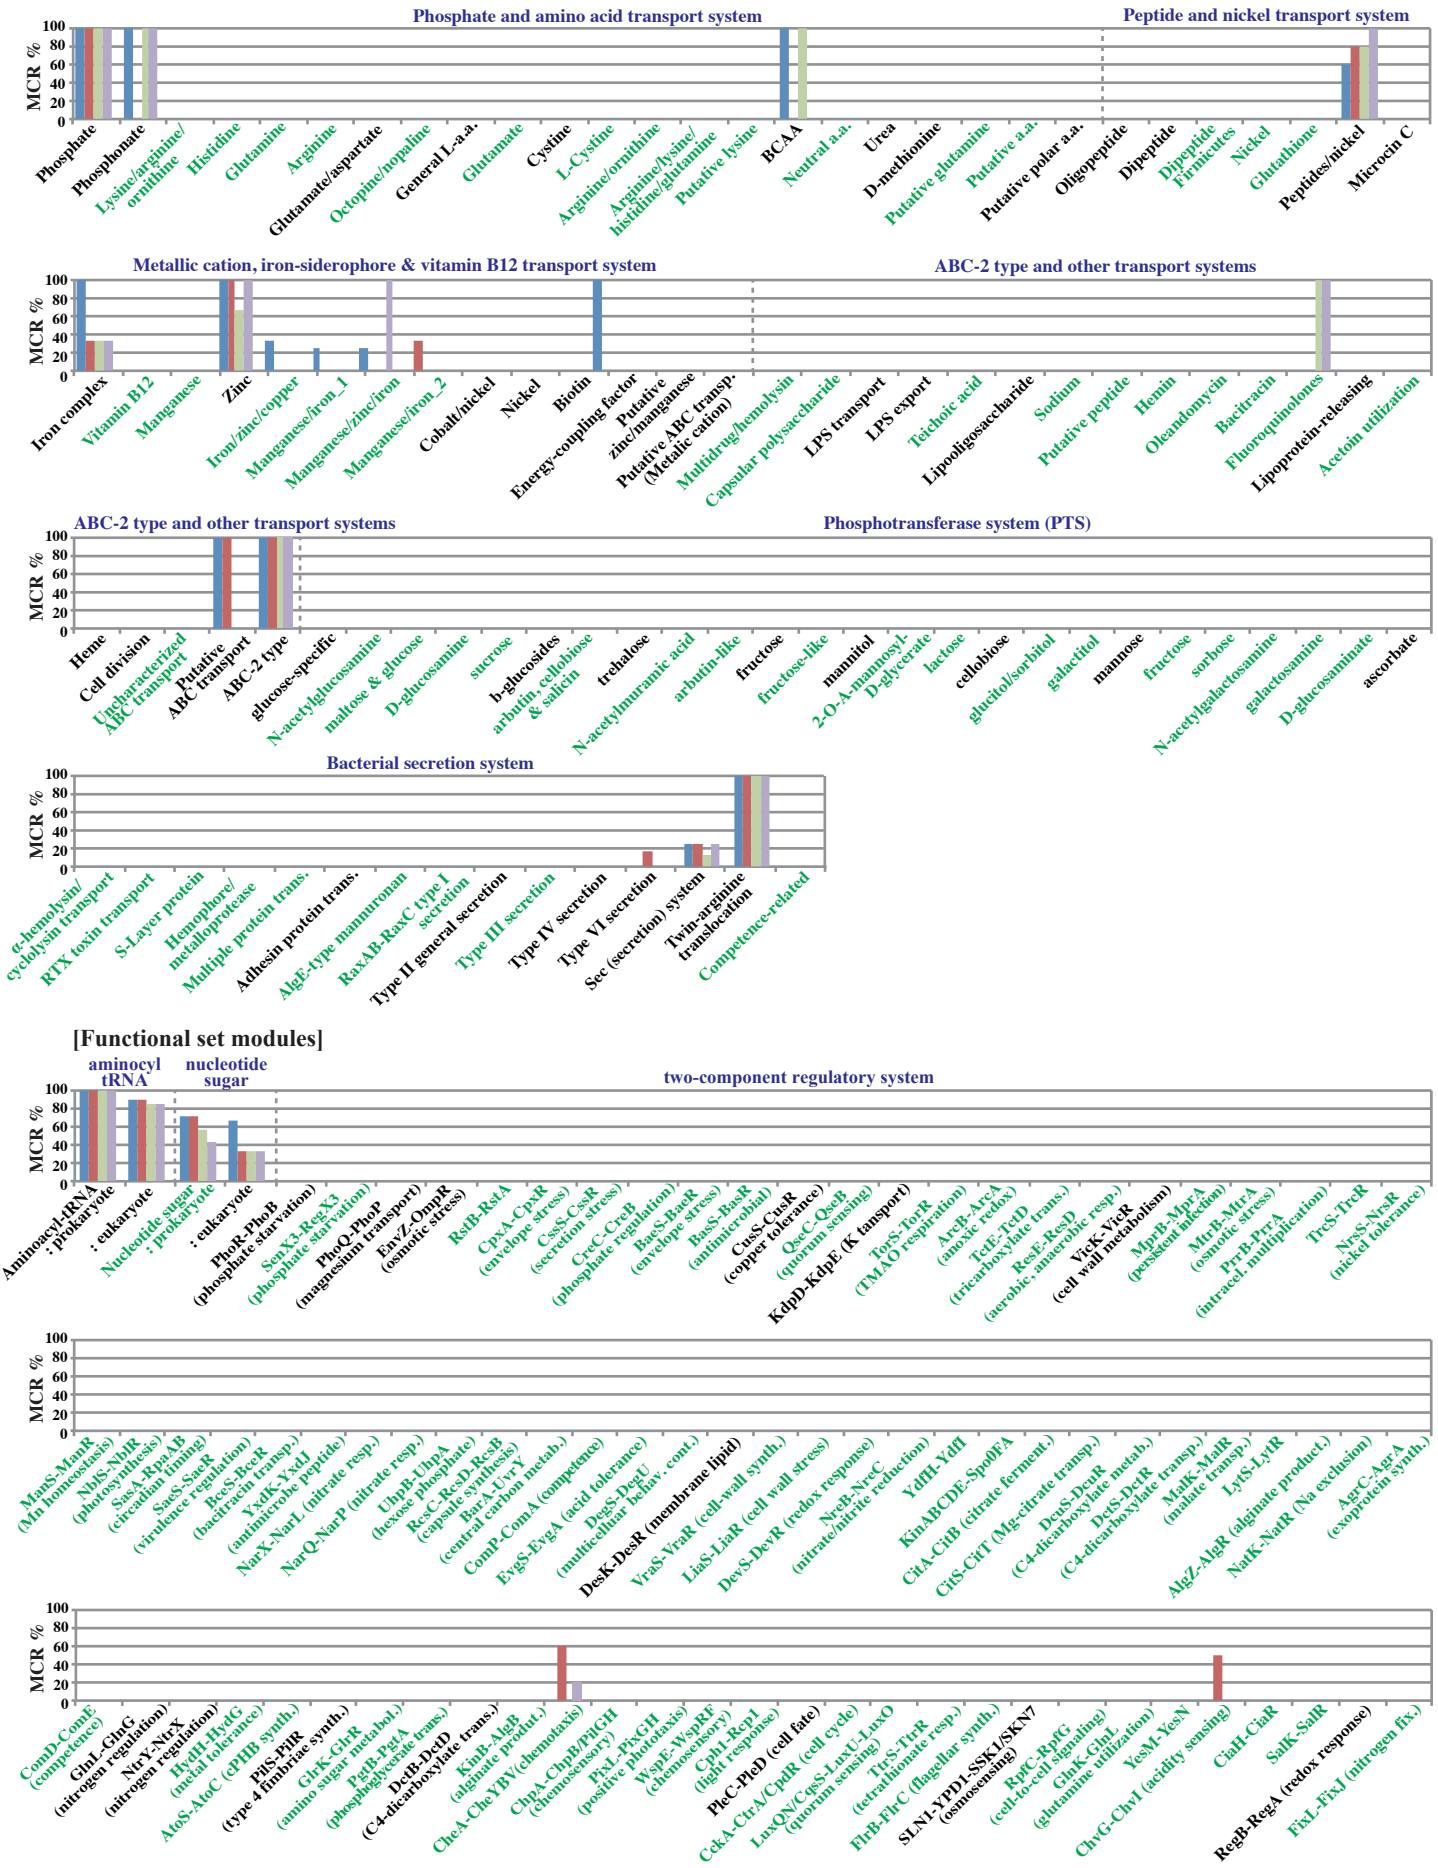

**Figure S1** Comparison of module completion pattern of uncultured Ca. “Caidiarchaeum” with those of representative species within *Thaumarchaeota*. continued
