# Supplementary material for: Functional Classification of Uncultured “Candidatus Caldiarchaeum subterraneum” Using the Maple System
Source: PubMed Central journal article supplement (PMC4510362; doi:10.1371/journal.pone.0132994), 2015-07-21
Supplement: pone.0132994.s004.pdf [file pone.0132994.s004.pdf]

**Table S1** List of organisms used for phylograms in Figure 1

| Superkingdom | Phylum                               | Species                              | Species ID                | family                  | Figure |
|--------------|--------------------------------------|--------------------------------------|---------------------------|-------------------------|--------|
| Archaea      | Aigarchaeota                         | <i>Caldiarchaeum subterraneum</i>    | csu                       | Unclassified            | A, B   |
|              |                                      | <i>Crenarchaeota</i>                 |                           |                         |        |
|              | <i>Aeropyrum camini</i>              | acj                                  | <i>Desulfurococcaceae</i> | A, B                    |        |
|              | <i>Acidianus hospitalis</i>          | aho                                  | <i>Sulfolobaceae</i>      | A, B                    |        |
|              | <i>Aeropyrum pernix</i>              | ape                                  | <i>Desulfurococcaceae</i> | A, B                    |        |
|              | <i>Acidilobus saccharovorans</i>     | asc                                  | <i>Acidilobaceae</i>      | A, B                    |        |
|              | <i>Caldisphaera lagunensis</i>       | clg                                  | <i>Caldisphaeraceae</i>   | A, B                    |        |
|              | <i>Caldivirga maquilingensis</i>     | cma                                  | <i>Thermoproteaceae</i>   | A, B                    |        |
|              | <i>Desulfurococcus fermentans</i>    | dfd                                  | <i>Desulfurococcaceae</i> | A, B                    |        |
|              | <i>Desulfurococcus kamchatkensis</i> | dka                                  | <i>Desulfurococcaceae</i> | A                       |        |
|              | <i>Desulfurococcus mucosus</i>       | dmu                                  | <i>Desulfurococcaceae</i> | A, B                    |        |
|              | <i>Fervidicoccus fontis</i>          | ffo                                  | <i>Fervidicoccaceae</i>   | A, B                    |        |
|              | <i>Hyperthermus butylicus</i>        | hbu                                  | <i>Pyrodictiaceae</i>     | A, B                    |        |
|              | <i>Ignisphaera aggregans</i>         | iag                                  | <i>Desulfurococcaceae</i> | A, B                    |        |
|              | <i>Ignicoccus hospitalis</i>         | iho                                  | <i>Desulfurococcaceae</i> | A, B                    |        |
|              | <i>Metallosphaera cuprina</i>        | mcn                                  | <i>Sulfolobaceae</i>      | A, B                    |        |
|              | <i>Metallosphaera sedula</i>         | mse                                  | <i>Sulfolobaceae</i>      | A, B                    |        |
|              | <i>Pyrobaculum aerophilum</i>        | pai                                  | <i>Thermoproteaceae</i>   | A, B                    |        |
|              | <i>Pyrobaculum arsenaticum</i>       | pas                                  | <i>Thermoproteaceae</i>   | A, B                    |        |
|              | <i>Pyrobaculum calidifontis</i>      | pcl                                  | <i>Thermoproteaceae</i>   | A, B                    |        |
|              | <i>Pyrolobus fumarii</i>             | pfm                                  | <i>Pyrodictiaceae</i>     | A, B                    |        |
|              | <i>Pyrobaculum islandicum</i>        | pis                                  | <i>Thermoproteaceae</i>   | A, B                    |        |
|              | <i>Pyrobaculum oguniense</i>         | pog                                  | <i>Thermoproteaceae</i>   | A, B                    |        |
|              | <i>Pyrobaculum</i> sp.               | pyr                                  | <i>Thermoproteaceae</i>   | A                       |        |
|              | <i>Sulfolobus acidocaldarius</i>     | sai                                  | <i>Sulfolobaceae</i>      | A, B                    |        |
|              | <i>Staphylothermus hellenicus</i>    | shc                                  | <i>Desulfurococcaceae</i> | A, B                    |        |
|              | <i>Sulfolobus islandicus</i>         | sih                                  | <i>Sulfolobaceae</i>      | A, B                    |        |
|              | <i>Staphylothermus marinus</i>       | smr                                  | <i>Desulfurococcaceae</i> | A, B                    |        |
|              | <i>Sulfolobus solfataricus</i>       | sol                                  | <i>Sulfolobaceae</i>      | A, B                    |        |
|              | <i>Sulfolobus tokodaii</i>           | sto                                  | <i>Sulfolobaceae</i>      | A, B                    |        |
|              | <i>Thermosphaera aggregans</i>       | tag                                  | <i>Desulfurococcaceae</i> | A, B                    |        |
|              | <i>Thermofilum</i> sp.               | thb                                  | <i>Thermofilaceae</i>     | A                       |        |
|              | <i>Thermogladius cellulolyticus</i>  | thg                                  | <i>Desulfurococcaceae</i> | A, B                    |        |
|              | <i>Pyrobaculum neutrophilum</i>      | tne                                  | <i>Thermoproteaceae</i>   | A, B                    |        |
|              | <i>Thermofilum pendens</i>           | tpe                                  | <i>Thermofilaceae</i>     | A, B                    |        |
|              | <i>Thermoproteus tenax</i>           | ttn                                  | <i>Thermoproteaceae</i>   | A, B                    |        |
|              | <i>Thermoproteus uzoniensis</i>      | tuz                                  | <i>Thermoproteaceae</i>   | A, B                    |        |
|              | <i>Vulcanisaeta distributa</i>       | vdi                                  | <i>Thermoproteaceae</i>   | A, B                    |        |
|              | <i>Vulcanisaeta moutnovskia</i>      | vmo                                  | <i>Thermoproteaceae</i>   | A, B                    |        |
|              | Euryarchaeota                        | <i>Aciduliprofundum boonei</i>       | abi                       | Unclassified            | A, B   |
|              |                                      | <i>Aciduliprofundum</i> sp.          | acf                       | Unclassified            | A, B   |
|              |                                      | <i>Archaeoglobus fulgidus</i>        | afu                       | <i>Archaeoglobaceae</i> | A, B   |
|              |                                      | <i>Archaeoglobus profundus</i>       | apo                       | <i>Archaeoglobaceae</i> | A, B   |
|              |                                      | <i>Archaeoglobus sulfaticallidus</i> | ast                       | <i>Archaeoglobaceae</i> | A      |
|              |                                      | <i>Archaeoglobus veneficus</i>       | ave                       | <i>Archaeoglobaceae</i> | A, B   |
|              |                                      | <i>Ferroplasma acidarmanus</i>       | fac                       | <i>Ferroplasmaceae</i>  | A, B   |
|              |                                      | <i>Ferroglobus placidus</i>          | fpl                       | <i>Archaeoglobaceae</i> | A, B   |

|                                           |     |                              |      |
|-------------------------------------------|-----|------------------------------|------|
| <i>Halobacterium salinarum</i>            | hal | <i>Halobacteriaceae</i>      | A, B |
| <i>Halogeometricum borinquense</i>        | hbo | <i>Halobacteriaceae</i>      | A, B |
| <i>Haloarcula hispanica</i>               | hhi | <i>Halobacteriaceae</i>      | A, B |
| <i>Halalkalicoccus jeotgali</i>           | hje | <i>Halobacteriaceae</i>      | A, B |
| <i>Halorubrum lacusprofundi</i>           | hla | <i>Halobacteriaceae</i>      | A, B |
| <i>Haloarcula marismortui</i>             | hma | <i>Halobacteriaceae</i>      | A, B |
| <i>Haloferax mediterranei</i>             | hme | <i>Halobacteriaceae</i>      | A, B |
| <i>Halomicrobium mukohataei</i>           | hmu | <i>Halobacteriaceae</i>      | A, B |
| <i>Halovivax ruber</i>                    | hru | <i>Halobacteriaceae</i>      | A, B |
| <i>Halobacterium salinarum</i>            | hsl | <i>Halobacteriaceae</i>      | A, B |
| <i>Halorhabdus tiamatea</i>               | hti | <i>Halobacteriaceae</i>      | A, B |
| <i>Haloterrigena turkmenica</i>           | htu | <i>Halobacteriaceae</i>      | A, B |
| <i>Halorhabdus utahensis</i>              | hut | <i>Halobacteriaceae</i>      | A, B |
| <i>Haloferax volcanii</i>                 | hvo | <i>Halobacteriaceae</i>      | A, B |
| <i>Haloquadratum walsbyi</i>              | hwc | <i>Halobacteriaceae</i>      | A, B |
| <i>Halopiger xanaduensis</i>              | hxa | <i>Halobacteriaceae</i>      | A, B |
| <i>Methanosarcina acetivorans</i>         | mac | <i>Methanosarcinaceae</i>    | A, B |
| <i>Methanococcus aeolicus</i>             | mae | <i>Methanococcaceae</i>      | A, B |
| <i>Methanomethylophilus alvus</i>         | max | Unclassified                 | A, B |
| <i>Methanosarcina barkeri</i>             | mba | <i>Methanosarcinaceae</i>    | A, B |
| <i>Methanoculleus bourgensis</i>          | mbg | <i>Methanomicrobiaceae</i>   | A, B |
| <i>Methanoregula boonei</i>               | mbn | <i>Methanoregulaceae</i>     | A, B |
| <i>Methanococcoides burtonii</i>          | mbu | <i>Methanosarcinaceae</i>    | A, B |
| <i>Methanosaeta concilii</i>              | mcj | <i>Methanosaetaceae</i>      | A, B |
| <i>Methanobrevibacter sp.</i>             | meb | <i>Methanobacteriaceae</i>   | A, B |
| <i>Methanobacterium sp.</i>               | mel | <i>Methanobacteriaceae</i>   | A, B |
| <i>Methanoculleus marisnigri</i>          | mem | <i>Methanomicrobiaceae</i>   | A, B |
| <i>Methanomassiliicoccus intestinalis</i> | mer | Unclassified                 | A, B |
| <i>Methanohalobium evestigatum</i>        | mev | <i>Methanosarcinaceae</i>    | A, B |
| <i>Methanobacterium sp.</i>               | mew | <i>Methanobacteriaceae</i>   | A, B |
| <i>Methanocella conradii</i>              | mez | <i>Methanocellaceae</i>      | A, B |
| <i>Methanocaldococcus fervens</i>         | mfe | <i>Methanocaldococcaceae</i> | A, B |
| <i>Methanoregula formicica</i>            | mfo | <i>Methanoregulaceae</i>     | A, B |
| <i>Methanocaldococcus sp.</i>             | mfs | <i>Methanocaldococcaceae</i> | A, B |
| <i>Methanothermus fervidus</i>            | mfv | <i>Methanothermaceae</i>     | A, B |
| <i>Methanosaeta harundinacea</i>          | mhi | <i>Methanosaetaceae</i>      | A, B |
| <i>Methanospirillum hungatei</i>          | mhu | <i>Methanospirillaceae</i>   | A, B |
| <i>Methanomethylovorans hollandica</i>    | mhz | <i>Methanosarcinaceae</i>    | A, B |
| <i>Methanocaldococcus infernus</i>        | mif | <i>Methanocaldococcaceae</i> | A, B |
| <i>Methanotorris igneus</i>               | mig | <i>Methanocaldococcaceae</i> | A, B |
| <i>Methanocaldococcus jannaschii</i>      | mja | <i>Methanocaldococcaceae</i> | A, B |
| <i>Methanopyrus kandleri</i>              | mka | <i>Methanopyraceae</i>       | A, B |
| <i>Methanocorpusculum labreanum</i>       | mla | <i>Methanocorpusculaceae</i> | A, B |
| <i>Methanosarcina mazei</i>               | mma | <i>Methanosarcinaceae</i>    | A, B |
| <i>Methanothermobacter marburgensis</i>   | mmg | <i>Methanobacteriaceae</i>   | A, B |
| <i>Methanohalophilus mahii</i>            | mmh | <i>Methanosarcinaceae</i>    | A, B |
| <i>Methanococcus maripaludis</i>          | mmq | <i>Methanococcaceae</i>      | A, B |
| <i>Methanococcus maripaludis</i>          | mmz | <i>Methanococcaceae</i>      | A    |
| <i>Methanothermococcus okinawensis</i>    | mok | <i>Methanococcaceae</i>      | A, B |

|                       |                                               |                          |                              |                           |   |
|-----------------------|-----------------------------------------------|--------------------------|------------------------------|---------------------------|---|
|                       | <i>Methanocella paludicola</i>                | mpd                      | <i>Methanocellaceae</i>      | A, B                      |   |
|                       | <i>Methanoplanus petrolearius</i>             | mpi                      | <i>Methanomicrobiaceae</i>   | A, B                      |   |
|                       | <i>Methanosphaerula palustris</i>             | mpl                      | <i>Methanoregulaceae</i>     | A, B                      |   |
|                       | <i>Methanolobus psychrophilus</i>             | mpy                      | <i>Methanosarcinaceae</i>    | A, B                      |   |
|                       | <i>Methanobrevibacter ruminantium</i>         | mru                      | <i>Methanobacteriaceae</i>   | A, B                      |   |
|                       | <i>Methanobrevibacter smithii</i>             | msi                      | <i>Methanobacteriaceae</i>   | A, B                      |   |
|                       | <i>Methanosphaera stadtmanae</i>              | mst                      | <i>Methanobacteriaceae</i>   | A, B                      |   |
|                       | <i>Methanothermobacter thermautotrophicus</i> | mth                      | <i>Methanobacteriaceae</i>   | A, B                      |   |
|                       | <i>Methanosaeta thermophila</i>               | mtp                      | <i>Methanosaetaceae</i>      | A, B                      |   |
|                       | <i>Methanococcus vannieli</i>                 | mvn                      | <i>Methanococcaceae</i>      | A, B                      |   |
|                       | <i>Methanococcus voltae</i>                   | mvo                      | <i>Methanococcaceae</i>      | A, B                      |   |
|                       | <i>Methanocaldococcus vulcanius</i>           | mvu                      | <i>Methanocaldococcaceae</i> | A, B                      |   |
|                       | <i>Methanosalsum zhilinae</i>                 | mzh                      | <i>Methanosarcinaceae</i>    | A, B                      |   |
|                       | <i>Natrinema</i> sp.                          | nat                      | <i>Halobacteriaceae</i>      | A, B                      |   |
|                       | <i>Natronobacterium gregoryi</i>              | nge                      | <i>Halobacteriaceae</i>      | A, B                      |   |
|                       | <i>Natrialba magadii</i>                      | nmg                      | <i>Halobacteriaceae</i>      | A, B                      |   |
|                       | <i>Natronomonas moolapensis</i>               | nmo                      | <i>Halobacteriaceae</i>      | A, B                      |   |
|                       | <i>Natronococcus occultus</i>                 | nou                      | <i>Halobacteriaceae</i>      | A, B                      |   |
|                       | <i>Natrinema pellirubrum</i>                  | npe                      | <i>Halobacteriaceae</i>      | A, B                      |   |
|                       | <i>Natronomonas pharaonis</i>                 | nph                      | <i>Halobacteriaceae</i>      | A, B                      |   |
|                       | <i>Pyrococcus abyssi</i>                      | pab                      | <i>Thermococcaceae</i>       | A, B                      |   |
|                       | <i>Pyrococcus furiosus</i>                    | pfi                      | <i>Thermococcaceae</i>       | A, B                      |   |
|                       | <i>Pyrococcus horikoshii</i>                  | pho                      | <i>Thermococcaceae</i>       | A, B                      |   |
|                       | <i>Picrophilus torridus</i>                   | pto                      | <i>Picrophilaceae</i>        | A, B                      |   |
|                       | <i>Pyrococcus yayanosii</i>                   | pya                      | <i>Thermococcaceae</i>       | A, B                      |   |
|                       | <i>Pyrococcus</i> sp.                         | pyn                      | <i>Thermococcaceae</i>       | A, B                      |   |
|                       | <i>Pyrococcus</i> sp.                         | pys                      | <i>Thermococcaceae</i>       | A                         |   |
|                       | <i>Methanocella arvoryzae</i>                 | rci                      | <i>Methanocellaceae</i>      | A, B                      |   |
|                       | <i>Salinarchaeum</i> sp.                      | sali                     | <i>Halobacteriaceae</i>      | A, B                      |   |
|                       | <i>Thermoplasma acidophilum</i>               | tac                      | <i>Thermoplasmataceae</i>    | A, B                      |   |
|                       | <i>Thermoplasmatales archaeon</i>             | tar                      | Unclassified                 | A, B                      |   |
|                       | <i>Thermococcus barophilus</i>                | tba                      | <i>Thermococcaceae</i>       | A, B                      |   |
|                       | <i>Thermococcus gammatolerans</i>             | tga                      | <i>Thermococcaceae</i>       | A, B                      |   |
|                       | <i>Thermococcus</i> sp.                       | the                      | <i>Thermococcaceae</i>       | A, B                      |   |
|                       | <i>Thermococcus kodakarensis</i>              | tko                      | <i>Thermococcaceae</i>       | A, B                      |   |
|                       | <i>Thermococcus litoralis</i>                 | tlt                      | <i>Thermococcaceae</i>       | A, B                      |   |
|                       | <i>Thermococcus onnurineus</i>                | ton                      | <i>Thermococcaceae</i>       | A, B                      |   |
|                       | <i>Thermococcus sibiricus</i>                 | tsi                      | <i>Thermococcaceae</i>       | A, B                      |   |
|                       | <i>Thermoplasma volcanium</i>                 | tvo                      | <i>Thermoplasmataceae</i>    | A, B                      |   |
| <i>Korarchaeota</i>   | <i>Korarchaeum cryptofilum</i>                | kcr                      | Unclassified                 | A, B                      |   |
| <i>Nanoarchaeota</i>  | <i>Nanoarchaeum equitans</i>                  | neq                      | Unclassified                 | A, B                      |   |
| <i>Thaumarchaeota</i> | <i>Cenarchaeum symbiosum</i>                  | csy                      | <i>Cenarchaeaceae</i>        | A, B                      |   |
|                       | <i>Nitrososphaera gargensis</i>               | nga                      | <i>Nitrososphaeraceae</i>    | A, B                      |   |
|                       | <i>Nitrosopumilus</i> sp.                     | nir                      | <i>Nitrosopumilaceae</i>     | A, B                      |   |
|                       | <i>Nitrosoarchaeum koreensis</i>              | nkr                      | <i>Nitrosopumilaceae</i>     | A, B                      |   |
|                       | <i>Nitrosopumilus maritimus</i>               | nmr                      | <i>Nitrosopumilaceae</i>     | A, B                      |   |
|                       | Unclassified <i>halophilic archaeon</i>       | hah                      | Unclassified                 | A, B                      |   |
| <b>Bacteria</b>       | <i>Firmicutes</i>                             | <i>Bacillus subtilis</i> | bsu                          | <i>Bacillaceae</i>        | A |
|                       | <i>γ-proteobacteria</i>                       | <i>Escherichia coli</i>  | eco                          | <i>Enterobacteriaceae</i> | A |

|           |                    |                                 |                                      |                           |                      |   |
|-----------|--------------------|---------------------------------|--------------------------------------|---------------------------|----------------------|---|
| Eukaryote | <i>Ascomycetes</i> | <i>Aspergillus fumigatus</i>    | afm                                  | <i>Aspergillaceae</i>     | B                    |   |
|           |                    | <i>Fusarium graminearum</i>     | fgr                                  | <i>Nectriaceae</i>        | B                    |   |
|           |                    | <i>Thielavia terrestris</i>     | ttt                                  | <i>Chaetomiaceae</i>      | B                    |   |
|           |                    | <i>Neurospora crassa</i>        | ncr                                  | <i>Sordariaceae</i>       | B                    |   |
|           |                    | <i>Debaryomyces hansenii</i>    | dha                                  | <i>Debaryomycetaceae</i>  | B                    |   |
|           |                    | <i>Yarrowia lipolytica</i>      | yli                                  | <i>Dipodascaceae</i>      | B                    |   |
|           |                    | <i>Eremothecium cymbalariae</i> | erc                                  | <i>Saccharomycetaceae</i> | B                    |   |
|           |                    | <i>Kazachstania africana</i>    | kaf                                  | <i>Saccharomycetaceae</i> | B                    |   |
|           |                    | <i>Pichia pastoris</i>          | ppa                                  | <i>Phaffomycetaceae</i>   | B                    |   |
|           |                    | <i>Naumovozyma castellii</i>    | ncs                                  | <i>Saccharomycetaceae</i> | B                    |   |
|           |                    | <i>Saccharomyces cerevisiae</i> | sce                                  | <i>Saccharomycetaceae</i> | B                    |   |
|           |                    | <i>Basidiomycetes</i>           | <i>Cryptococcus neoformans</i> JEC21 | cne                       | <i>Tremellaceae</i>  | B |
|           |                    | <i>Microsporidians</i>          | <i>Encephalitozoon cuniculi</i>      | ecu                       | <i>Unikaryonidae</i> | B |

---
