# Supplementary material for: Functional Classification of Uncultured “Candidatus Caldiarchaeum subterraneum” Using the Maple System
Source: PubMed Central journal article supplement (PMC4510362; doi:10.1371/journal.pone.0132994), 2015-07-21
Supplement: pone.0132994.s005.pdf [file pone.0132994.s005.pdf]

**Table S2** List of the archaeal species used for evaluation of physiological and metabolic potential by MAPLE system

| Species                                       | Species ID | Class                  | Order                     |
|-----------------------------------------------|------------|------------------------|---------------------------|
| [ <i>Euryarchaeota</i> : 53 species]          |            |                        |                           |
| <i>Methanocaldococcus jannaschii</i>          | mja        | <i>Methanococci</i>    | <i>Methanococcales</i>    |
| <i>Methanotorris igneus</i>                   | mig        | <i>Methanococci</i>    | <i>Methanococcales</i>    |
| <i>Methanococcus vannielii</i>                | mvn        | <i>Methanococci</i>    | <i>Methanococcales</i>    |
| <i>Methanothermococcus okinawensis</i>        | mok        | <i>Methanococci</i>    | <i>Methanococcales</i>    |
| <i>Methanosarcina barkeri</i>                 | mba        | <i>Methanomicrobia</i> | <i>Methanosarcinales</i>  |
| <i>Methanococcoides burtonii</i>              | mbu        | <i>Methanomicrobia</i> | <i>Methanosarcinales</i>  |
| <i>Methanohalophilus mahii</i>                | mmh        | <i>Methanomicrobia</i> | <i>Methanosarcinales</i>  |
| <i>Methanohalobium evestigatum</i>            | mev        | <i>Methanomicrobia</i> | <i>Methanosarcinales</i>  |
| <i>Methanosalsum zhilinae</i>                 | mzh        | <i>Methanomicrobia</i> | <i>Methanosarcinales</i>  |
| <i>Methanolobus psychrophilus</i>             | mpy        | <i>Methanomicrobia</i> | <i>Methanosarcinales</i>  |
| <i>Methanomethylovorans hollandica</i>        | mhz        | <i>Methanomicrobia</i> | <i>Methanosarcinales</i>  |
| <i>Methanosaeta concilii</i>                  | mcj        | <i>Methanomicrobia</i> | <i>Methanosarcinales</i>  |
| <i>Methanospirillum hungatei</i>              | mhu        | <i>Methanomicrobia</i> | <i>Methanomicrobiales</i> |
| <i>Methanocorpusculum labreanum</i>           | mlla       | <i>Methanomicrobia</i> | <i>Methanomicrobiales</i> |
| <i>Methanoculleus bourgensis</i>              | mbg        | <i>Methanomicrobia</i> | <i>Methanomicrobiales</i> |
| <i>Methanoplanus petrolearius</i>             | mpi        | <i>Methanomicrobia</i> | <i>Methanomicrobiales</i> |
| <i>Methanoregula boonei</i>                   | mbn        | <i>Methanomicrobia</i> | <i>Methanomicrobiales</i> |
| Candidatus <i>Methanosphaerula palustris</i>  | mpl        | <i>Methanomicrobia</i> | <i>Methanomicrobiales</i> |
| <i>Methanocella paludicola</i>                | mpd        | <i>Methanomicrobia</i> | <i>Methanocellales</i>    |
| <i>Methanomassiliicoccus</i> sp. Mx1-Issoire  | mer        | <i>Methanomicrobia</i> | Unclassified              |
| <i>Methanothermobacter thermautotrophicus</i> | mth        | <i>Methanobacteria</i> | <i>Methanobacteriales</i> |
| <i>Methanosphaera stadtmanae</i>              | mst        | <i>Methanobacteria</i> | <i>Methanobacteriales</i> |
| <i>Methanobrevibacter ruminantium</i>         | mru        | <i>Methanobacteria</i> | <i>Methanobacteriales</i> |
| <i>Methanobacterium lacus</i>                 | mel        | <i>Methanobacteria</i> | <i>Methanobacteriales</i> |
| <i>Methanothermus fervidus</i>                | mfv        | <i>Methanobacteria</i> | <i>Methanobacteriales</i> |
| <i>Methanopyrus kandleri</i>                  | mka        | <i>Methanopyri</i>     | <i>Methanopyrales</i>     |
| Candidatus <i>Methanomethylophilus alvus</i>  | max        | Unclassified           | Unclassified              |
| <i>Archaeoglobus fulgidus</i> DSM 4304        | afu        | <i>Archaeoglobi</i>    | <i>Archaeoglobales</i>    |
| <i>Ferroglobus placidus</i>                   | fpl        | <i>Archaeoglobi</i>    | <i>Archaeoglobales</i>    |
| <i>Halobacterium salinarum</i>                | hsl        | <i>Halobacteria</i>    | <i>Halobacteriales</i>    |
| <i>Haloarcula marismortui</i>                 | hma        | <i>Halobacteria</i>    | <i>Halobacteriales</i>    |
| <i>Haloquadratum walsbyi</i> DSM 16790        | hwa        | <i>Halobacteria</i>    | <i>Halobacteriales</i>    |
| <i>Natronomonas pharaonis</i>                 | nph        | <i>Halobacteria</i>    | <i>Halobacteriales</i>    |
| <i>Halorubrum lacusprofundi</i>               | hla        | <i>Halobacteria</i>    | <i>Halobacteriales</i>    |
| <i>Halorhabdus utahensis</i>                  | hut        | <i>Halobacteria</i>    | <i>Halobacteriales</i>    |
| <i>Halomicrobium mukohataei</i>               | hmu        | <i>Halobacteria</i>    | <i>Halobacteriales</i>    |
| <i>Haloterrigena turkmenica</i>               | htu        | <i>Halobacteria</i>    | <i>Halobacteriales</i>    |
| <i>Natrialba magadii</i>                      | nmg        | <i>Halobacteria</i>    | <i>Halobacteriales</i>    |
| <i>Haloferax volcanii</i>                     | hvo        | <i>Halobacteria</i>    | <i>Halobacteriales</i>    |
| <i>Halalkalicoccus jeotgali</i>               | hje        | <i>Halobacteria</i>    | <i>Halobacteriales</i>    |

|                                                |      |                       |                          |
|------------------------------------------------|------|-----------------------|--------------------------|
| <i>Halogeometricum borinquense</i>             | hbo  | <i>Halobacteria</i>   | <i>Halobacteriales</i>   |
| <i>Halopiger xanaduensis</i>                   | hxa  | <i>Halobacteria</i>   | <i>Halobacteriales</i>   |
| <i>Natrinema pellirubrum</i>                   | npe  | <i>Halobacteria</i>   | <i>Halobacteriales</i>   |
| <i>Natronobacterium gregoryi</i>               | nge  | <i>Halobacteria</i>   | <i>Halobacteriales</i>   |
| <i>Halovivax ruber</i>                         | hru  | <i>Halobacteria</i>   | <i>Halobacteriales</i>   |
| <i>Natronococcus occultus</i>                  | nou  | <i>Halobacteria</i>   | <i>Halobacteriales</i>   |
| <i>Salinarchaeum</i> sp. Harcht-Bsk1           | sali | <i>Halobacteria</i>   | <i>Halobacteriales</i>   |
| <i>Thermoplasma acidophilum</i>                | tac  | <i>Thermoplasmata</i> | <i>Thermoplasmatales</i> |
| <i>Picrophilus torridus</i>                    | pto  | <i>Thermoplasmata</i> | <i>Thermoplasmatales</i> |
| <i>Ferroplasma acidarmanus</i>                 | fac  | <i>Thermoplasmata</i> | <i>Thermoplasmatales</i> |
| <i>Pyrococcus furiosus</i> DSM 3638            | pfu  | <i>Thermococci</i>    | <i>Thermococcales</i>    |
| <i>Thermococcus kodakarensis</i>               | tko  | <i>Thermococci</i>    | <i>Thermococcales</i>    |
| <i>Aciduliprofundum boonei</i>                 | abi  | Unclassified          | Unclassified             |
| <b>[Crenarchaeota: 20 species]</b>             |      |                       |                          |
| <i>Aeropyrum pernix</i>                        | ape  | <i>Thermoprotei</i>   | <i>Desulfurococcales</i> |
| <i>Staphylothermus marinus</i>                 | smr  | <i>Thermoprotei</i>   | <i>Desulfurococcales</i> |
| <i>Ignicoccus hospitalis</i>                   | iho  | <i>Thermoprotei</i>   | <i>Desulfurococcales</i> |
| <i>Desulfurococcus mucosus</i>                 | dmu  | <i>Thermoprotei</i>   | <i>Desulfurococcales</i> |
| <i>Thermosphaera aggregans</i>                 | tag  | <i>Thermoprotei</i>   | <i>Desulfurococcales</i> |
| <i>Ignisphaera aggregans</i>                   | iag  | <i>Thermoprotei</i>   | <i>Desulfurococcales</i> |
| <i>Thermogladius cellulolyticus</i>            | thg  | <i>Thermoprotei</i>   | <i>Desulfurococcales</i> |
| <i>Hyperthermus butylicus</i>                  | hbu  | <i>Thermoprotei</i>   | <i>Desulfurococcales</i> |
| <i>Pyrolobus fumarii</i>                       | pfm  | <i>Thermoprotei</i>   | <i>Desulfurococcales</i> |
| <i>Sulfolobus acidocaldarius</i> DSM 639       | sai  | <i>Thermoprotei</i>   | <i>Sulfolobales</i>      |
| <i>Metallosphaera sedula</i>                   | mse  | <i>Thermoprotei</i>   | <i>Sulfolobales</i>      |
| <i>Acidianus hospitalis</i>                    | aho  | <i>Thermoprotei</i>   | <i>Sulfolobales</i>      |
| <i>Pyrobaculum islandicum</i>                  | pis  | <i>Thermoprotei</i>   | <i>Thermoproteales</i>   |
| <i>Caldivirga maquilingensis</i>               | cma  | <i>Thermoprotei</i>   | <i>Thermoproteales</i>   |
| <i>Thermoproteus tenax</i>                     | ttn  | <i>Thermoprotei</i>   | <i>Thermoproteales</i>   |
| <i>Vulcanisaeta distributa</i>                 | vdi  | <i>Thermoprotei</i>   | <i>Thermoproteales</i>   |
| <i>Thermofilum pendens</i>                     | tpe  | <i>Thermoprotei</i>   | <i>Thermoproteales</i>   |
| <i>Acidilobus saccharovorans</i>               | asc  | <i>Thermoprotei</i>   | <i>Acidilobales</i>      |
| <i>Caldisphaera lagunensis</i>                 | clg  | <i>Thermoprotei</i>   | <i>Acidilobales</i>      |
| <i>Fervidicoccus fontis</i>                    | ffo  | <i>Thermoprotei</i>   | <i>Fervidicoccales</i>   |
| <b>[Thaumarchaeota: 3 species]</b>             |      |                       |                          |
| <i>Nitrosopumilus maritimus</i>                | nmr  | Unclassified          | <i>Nitrosopumilales</i>  |
| <i>Cenarchaeum symbiosum</i>                   | csy  | Unclassified          | <i>Cenarchaeales</i>     |
| <i>Candidatus "Nitrososphaera gargensis"</i>   | nga  | Unclassified          | <i>Nitrososphaerales</i> |
| <b>[Aigarchaeota: 1 species]</b>               |      |                       |                          |
| <i>Candidatus "Caldiarchaeum subterraneum"</i> | csu  | Unclassified          | Unclassified             |
| <b>[Nanoarchaeota: 1 species]</b>              |      |                       |                          |
| <i>Nanoarchaeum equitans</i>                   | neq  | Unclassified          | Unclassified             |
| <b>[Korarchaeota: 1 species]</b>               |      |                       |                          |
| <i>Candidatus "Korarchaeum cryptofilum"</i>    | kcr  | Unclassified          | Unclassified             |
