# Supplementary material for: Functional Classification of Uncultured “Candidatus Caldiarchaeum subterraneum” Using the Maple System
Source: PubMed Central journal article supplement (PMC4510362; doi:10.1371/journal.pone.0132994), 2015-07-21
Supplement: pone.0132994.s006.pdf [file pone.0132994.s006.pdf]

**Table S3** Module completion patterns in 79 archaeal species listed in Table S2 (Methanogenic euryarchaeota).

| ID                | Module name                                                               | Module completion ratio (%) |      |      |      |      |      |      |      |      |      |      |      |      |      |      |      |      |      |      |      |      |      |      |      |      |      |      |  |
|-------------------|---------------------------------------------------------------------------|-----------------------------|------|------|------|------|------|------|------|------|------|------|------|------|------|------|------|------|------|------|------|------|------|------|------|------|------|------|--|
|                   |                                                                           | mja                         | mig  | mvn  | mok  | mba  | mbu  | mmh  | mev  | mzh  | mpy  | mlz  | mcj  | mhu  | mha  | mbg  | mpi  | mbn  | mpl  | mpd  | mer  | mth  | mst  | mru  | mel  | mfv  | mka  | max  |  |
| Pathway module    |                                                                           |                             |      |      |      |      |      |      |      |      |      |      |      |      |      |      |      |      |      |      |      |      |      |      |      |      |      |      |  |
| Energy metabolism |                                                                           |                             |      |      |      |      |      |      |      |      |      |      |      |      |      |      |      |      |      |      |      |      |      |      |      |      |      |      |  |
| M00165            | Reductive pentose phosphate cycle (Calvin cycle)                          | 54.5                        | 54.5 | 45.5 | 54.5 | 45.5 | 63.6 | 63.6 | 63.6 | 63.6 | 45.5 | 45.5 | 54.5 | 54.5 | 45.5 | 72.7 | 72.7 | 54.5 | 54.5 | 54.5 | 27.3 | 27.3 | 27.3 | 27.3 | 27.3 | 27.3 | 27.3 | 54.5 |  |
| M00166            | Reductive pentose phosphate cycle, ribulose-5P => glyceraldehyde-3P       | 75                          | 75   | 50   | 75   | 75   | 75   | 75   | 75   | 75   | 75   | 100  | 100  | 75   | 100  | 100  | 100  | 100  | 75   | 75   | 50   | 50   | 50   | 50   | 50   | 50   | 50   | 75   |  |
| M00167            | Reductive pentose phosphate cycle, glyceraldehyde-3P => ribulose-5P       | 42.9                        | 42.9 | 42.9 | 42.9 | 28.6 | 57.1 | 57.1 | 57.1 | 28.6 | 28.6 | 28.6 | 28.6 | 28.6 | 14.3 | 57.1 | 57.1 | 28.6 | 42.9 | 42.9 | 14.3 | 14.3 | 14.3 | 14.3 | 14.3 | 14.3 | 14.3 | 42.9 |  |
| M00168            | CAM (Crassulacean acid metabolism), dark                                  | 50                          | 50   | 50   | 50   | 100  | 0    | 50   | 100  | 100  | 50   | 50   | 0    | 100  | 50   | 100  | 100  | 50   | 50   | 0    | 50   | 100  | 50   | 50   | 50   | 50   | 100  | 0    |  |
| M00169            | CAM (Crassulacean acid metabolism), light                                 | 0                           | 0    | 0    | 0    | 50   | 50   | 50   | 50   | 50   | 50   | 0    | 50   | 0    | 0    | 0    | 0    | 0    | 0    | 0    | 0    | 0    | 0    | 0    | 0    | 0    | 0    | 0    |  |
| M00172            | C4-dicarboxylic acid cycle, NADP - malic enzyme type                      | 0                           | 0    | 0    | 0    | 50   | 25   | 25   | 50   | 50   | 25   | 25   | 0    | 50   | 0    | 25   | 25   | 0    | 0    | 0    | 25   | 25   | 0    | 0    | 0    | 25   | 25   | 0    |  |
| M00171            | C4-dicarboxylic acid cycle, NAD - malic enzyme type                       | 0                           | 0    | 0    | 0    | 28.6 | 14.3 | 14.3 | 28.6 | 28.6 | 14.3 | 14.3 | 0    | 28.6 | 0    | 14.3 | 14.3 | 0    | 0    | 0    | 14.3 | 14.3 | 0    | 0    | 0    | 14.3 | 14.3 | 0    |  |
| M00170            | C4-dicarboxylic acid cycle, phosphoenolpyruvate carboxykinase type        | 0                           | 0    | 0    | 0    | 25   | 0    | 0    | 25   | 25   | 0    | 0    | 0    | 25   | 0    | 25   | 25   | 0    | 0    | 0    | 25   | 25   | 0    | 0    | 0    | 25   | 25   | 0    |  |
| M00173            | Reductive citrate cycle (Arnon-Buchanan cycle)                            | 60                          | 60   | 60   | 60   | 72.7 | 60   | 80   | 81.8 | 72.7 | 70   | 70   | 50   | 63.6 | 60   | 63.6 | 63.6 | 60   | 60   | 40   | 54.5 | 54.5 | 60   | 60   | 70   | 54.5 | 63.6 | 36.4 |  |
| M00376            | 3-Hydroxypropionate bi-cycle                                              | 6.2                         | 6.2  | 6.2  | 6.2  | 6.2  | 6.2  | 12.5 | 12.5 | 12.5 | 6.2  | 6.2  | 6.2  | 6.2  | 6.2  | 6.2  | 6.2  | 6.2  | 6.2  | 6.2  | 6.2  | 6.2  | 6.2  | 6.2  | 12.5 | 6.2  | 6.2  | 6.2  |  |
| M00375            | Hydroxypropionate-hydroxybutyrate cycle                                   | 8.3                         | 8.3  | 8.3  | 8.3  | 8.3  | 8.3  | 8.3  | 8.3  | 8.3  | 8.3  | 8.3  | 8.3  | 8.3  | 8.3  | 8.3  | 8.3  | 8.3  | 8.3  | 8.3  | 8.3  | 8.3  | 8.3  | 8.3  | 8.3  | 8.3  | 8.3  | 8.3  |  |
| M00374            | Dicarboxylate-hydroxybutyrate cycle                                       | 46.2                        | 46.2 | 46.2 | 46.2 | 46.2 | 30.8 | 46.2 | 53.8 | 53.8 | 38.5 | 38.5 | 30.8 | 53.8 | 46.2 | 53.8 | 53.8 | 46.2 | 46.2 | 30.8 | 38.5 | 46.2 | 46.2 | 46.2 | 53.8 | 46.2 | 53.8 | 30.8 |  |
| M00377            | Reductive acetyl-CoA pathway (Wood-Ljungdahl pathway)                     | 14.3                        | 14.3 | 0    | 0    | 28.6 | 14.3 | 14.3 | 14.3 | 14.3 | 28.6 | 28.6 | 28.6 | 28.6 | 14.3 | 28.6 | 28.6 | 28.6 | 28.6 | 0    | 71.4 | 0    | 0    | 0    | 0    | 0    | 14.3 | 28.6 |  |
| M00579            | Phosphate acetyltransferase-acetate kinase pathway, acetyl-CoA => acetate | 0                           | 0    | 0    | 0    | 100  | 0    | 0    | 0    | 0    | 0    | 0    | 0    | 0    | 0    | 0    | 0    | 0    | 0    | 0    | 0    | 0    | 0    | 0    | 0    | 0    | 0    | 0    |  |
| M00175            | Nitrogen fixation, nitrogen => ammonia                                    | 0                           | 100  | 100  | 100  | 100  | 0    | 0    | 0    | 0    | 100  | 0    | 100  | 0    | 0    | 0    | 100  | 100  | 100  | 0    | 0    | 100  | 0    | 0    | 100  | 0    | 0    | 0    |  |
| M00531            | Assimilatory nitrate reduction, nitrate => ammonia                        | 0                           | 0    | 0    | 0    | 0    | 0    | 0    | 0    | 0    | 0    | 0    | 0    | 0    | 0    | 0    | 0    | 0    | 0    | 0    | 0    | 0    | 0    | 0    | 0    | 0    | 0    | 50   |  |
| M00530            | Dissimilatory nitrate reduction, nitrate => ammonia                       | 0                           | 0    | 0    | 0    | 0    | 0    | 0    | 0    | 0    | 0    | 0    | 0    | 0    | 0    | 0    | 0    | 0    | 0    | 0    | 0    | 0    | 0    | 0    | 0    | 0    | 0    | 0    |  |
| M00529            | Denitrification, nitrate => nitrogen                                      | 0                           | 0    | 0    | 0    | 0    | 0    | 0    | 0    | 0    | 0    | 0    | 0    | 0    | 0    | 0    | 0    | 0    | 0    | 0    | 0    | 0    | 0    | 0    | 0    | 0    | 0    | 0    |  |
| M00528            | Nitrification, ammonia => nitrite                                         | 0                           | 0    | 0    | 0    | 0    | 0    | 0    | 0    | 0    | 0    | 0    | 0    | 0    | 0    | 0    | 0    | 0    | 0    | 0    | 0    | 0    | 0    | 0    | 0    | 0    | 0    | 0    |  |
| M00567            | Methanogenesis, CO2 => methane                                            | 75                          | 100  | 100  | 100  | 100  | 100  | 100  | 100  | 100  | 100  | 100  | 100  | 100  | 100  | 100  | 100  | 100  | 100  | 25   | 100  | 100  | 100  | 100  | 100  | 100  | 25   |      |  |
| M00357            | Methanogenesis, acetate => methane                                        | 60                          | 80   | 80   | 100  | 100  | 100  | 100  | 100  | 100  | 100  | 100  | 100  | 100  | 80   | 100  | 80   | 100  | 100  | 80   | 60   | 100  | 80   | 80   | 100  | 100  | 80   | 40   |  |
| M00356            | Methanogenesis, methanol => methane                                       | 33.3                        | 66.7 | 66.7 | 66.7 | 100  | 100  | 100  | 100  | 100  | 100  | 100  | 66.7 | 66.7 | 66.7 | 66.7 | 66.7 | 66.7 | 66.7 | 100  | 66.7 | 100  | 66.7 | 100  | 66.7 | 66.7 | 100  | 100  |  |
| M00563            | Methanogenesis, mono-/di-/tri-methylamine => methane                      | 25                          | 50   | 50   | 50   | 100  | 100  | 100  | 100  | 100  | 100  | 50   | 50   | 50   | 50   | 50   | 50   | 50   | 50   | 75   | 50   | 50   | 50   | 50   | 50   | 50   | 75   |      |  |
| M00358            | Coenzyme M biosynthesis                                                   | 75                          | 100  | 100  | 100  | 0    | 25   | 25   | 0    | 0    | 25   | 25   | 25   | 0    | 0    | 0    | 0    | 0    | 25   | 25   | 100  | 100  | 50   | 100  | 100  | 100  | 0    |      |  |
| M00174            | Methane oxidation, methanotroph, methane => formaldehyde                  | 0                           | 0    | 0    | 0    | 0    | 0    | 0    | 0    | 0    | 0    | 0    | 0    | 0    | 0    | 0    | 0    | 0    | 0    | 0    | 0    | 0    | 0    | 0    | 0    | 0    | 0    |      |  |
| M00346            | Formaldehyde assimilation, serine pathway                                 | 33.3                        | 33.3 | 22.2 | 22.2 | 44.4 | 22.2 | 33.3 | 44.4 | 55.6 | 44.4 | 44.4 | 22.2 | 55.6 | 33.3 | 44.4 | 44.4 | 33.3 | 33.3 | 33.3 | 33.3 | 44.4 | 33.3 | 33.3 | 33.3 | 44.4 | 22.2 |      |  |

| ID                              | Module name                                                                               | Module completion ratio (%) |      |      |      |      |      |      |      |      |      |      |      |      |      |      |      |      |      |      |      |      |      |      |      |      |      |     |  |
|---------------------------------|-------------------------------------------------------------------------------------------|-----------------------------|------|------|------|------|------|------|------|------|------|------|------|------|------|------|------|------|------|------|------|------|------|------|------|------|------|-----|--|
|                                 |                                                                                           | mja                         | mig  | mvn  | mok  | mba  | mbu  | mmh  | mev  | mzh  | mpy  | mhz  | mcj  | mhu  | mha  | mbg  | mpi  | mbn  | mpl  | mpd  | mer  | mth  | mst  | mru  | mel  | mfv  | mka  | max |  |
| M00345                          | Formaldehyde assimilation, ribulose monophosphate pathway                                 | 50                          | 50   | 33.3 | 50   | 50   | 75   | 75   | 75   | 75   | 75   | 33.3 | 75   | 50   | 75   | 50   | 100  | 75   | 100  | 33.3 | 50   | 50   | 50   | 50   | 50   | 50   | 33.3 |     |  |
| M00344                          | Formaldehyde assimilation, xylulose monophosphate pathway                                 | 0                           | 0    | 0    | 0    | 0    | 25   | 25   | 25   | 25   | 0    | 0    | 25   | 25   | 0    | 25   | 50   | 25   | 25   | 0    | 0    | 0    | 0    | 0    | 0    | 0    | 0    |     |  |
| M00378                          | F420 biosynthesis                                                                         | 100                         | 100  | 100  | 100  | 80   | 80   | 80   | 80   | 100  | 100  | 80   | 80   | 60   | 60   | 60   | 80   | 60   | 60   | 80   | 0    | 80   | 80   | 80   | 80   | 80   | 0    |     |  |
| M00422                          | Acetyl-CoA pathway, CO2 => acetyl-CoA                                                     | 100                         | 100  | 100  | 100  | 100  | 100  | 100  | 100  | 100  | 100  | 100  | 100  | 0    | 50   | 0    | 100  | 50   | 0    | 0    | 100  | 0    | 0    | 100  | 100  | 100  | 0    |     |  |
| M00176                          | Assimilatory sulfate reduction, sulfate => H2S                                            | 33.3                        | 33.3 | 33.3 | 33.3 | 33.3 | 33.3 | 33.3 | 66.7 | 33.3 | 33.3 | 33.3 | 33.3 | 33.3 | 33.3 | 33.3 | 33.3 | 33.3 | 33.3 | 66.7 | 33.3 | 0    | 0    | 0    | 0    | 0    | 33.3 |     |  |
| M00596                          | Dissimilatory sulfate reduction, sulfate => H2S                                           | 0                           | 0    | 0    | 0    | 0    | 0    | 33.3 | 33.3 | 0    | 0    | 0    | 0    | 0    | 0    | 0    | 0    | 0    | 0    | 33.3 | 0    | 0    | 0    | 0    | 0    | 0    | 0    |     |  |
| Carbohydrate & lipid metabolism |                                                                                           |                             |      |      |      |      |      |      |      |      |      |      |      |      |      |      |      |      |      |      |      |      |      |      |      |      |      |     |  |
| M00001                          | Glycolysis (Embden-Meyerhof pathway), glucose => pyruvate                                 | 100                         | 90   | 100  | 100  | 100  | 100  | 100  | 100  | 100  | 100  | 90   | 100  | 80   | 100  | 70   | 90   | 100  | 90   | 70   | 60   | 60   | 70   | 60   | 60   | 60   | 60   |     |  |
| M00002                          | Glycolysis, core module involving three-carbon compounds                                  | 100                         | 83.3 | 100  | 100  | 100  | 100  | 100  | 100  | 100  | 100  | 83.3 | 100  | 83.3 | 100  | 83.3 | 83.3 | 100  | 100  | 83.3 | 83.3 | 83.3 | 100  | 83.3 | 83.3 | 83.3 | 83.3 |     |  |
| M00003                          | Gluconeogenesis, oxaloacetate => fructose-6P                                              | 62.5                        | 62.5 | 75   | 62.5 | 62.5 | 62.5 | 62.5 | 62.5 | 62.5 | 50   | 50   | 75   | 62.5 | 75   | 75   | 62.5 | 75   | 75   | 50   | 62.5 | 62.5 | 62.5 | 62.5 | 62.5 | 62.5 | 75   |     |  |
| M00307                          | Pyruvate oxidation, pyruvate => acetyl-CoA                                                | 100                         | 100  | 100  | 100  | 100  | 100  | 100  | 100  | 100  | 100  | 100  | 100  | 100  | 100  | 100  | 100  | 100  | 100  | 100  | 0    | 100  | 100  | 100  | 100  | 100  | 100  |     |  |
| M00009                          | Citrate cycle (TCA cycle, Krebs cycle)                                                    | 50                          | 50   | 50   | 50   | 62.5 | 37.5 | 50   | 50   | 50   | 62.5 | 62.5 | 37.5 | 50   | 50   | 50   | 50   | 50   | 50   | 25   | 62.5 | 62.5 | 50   | 62.5 | 62.5 | 50   | 37.5 |     |  |
| M00010                          | Citrate cycle, first carbon oxidation, oxaloacetate => 2-oxoglutarate                     | 0                           | 0    | 0    | 0    | 100  | 66.7 | 66.7 | 66.7 | 66.7 | 100  | 100  | 66.7 | 0    | 0    | 0    | 0    | 0    | 0    | 33.3 | 100  | 33.3 | 0    | 33.3 | 33.3 | 33.3 | 66.7 |     |  |
| M00011                          | Citrate cycle, second carbon oxidation, 2-oxoglutarate => oxaloacetate                    | 80                          | 80   | 80   | 80   | 40   | 20   | 40   | 40   | 40   | 40   | 40   | 20   | 80   | 80   | 80   | 80   | 80   | 80   | 20   | 40   | 80   | 80   | 80   | 80   | 60   | 20   |     |  |
| M00004                          | Pentose phosphate pathway (Pentose phosphate cycle)                                       | 71.4                        | 71.4 | 71.4 | 71.4 | 28.6 | 28.6 | 28.6 | 28.6 | 28.6 | 28.6 | 28.6 | 28.6 | 28.6 | 28.6 | 28.6 | 57.1 | 28.6 | 28.6 | 42.9 | 71.4 | 14.3 | 14.3 | 14.3 | 14.3 | 14.3 | 71.4 |     |  |
| M00006                          | Pentose phosphate pathway, oxidative phase, glucose 6P => ribulose 5P                     | 0                           | 0    | 0    | 0    | 0    | 0    | 0    | 0    | 0    | 0    | 0    | 0    | 0    | 0    | 0    | 0    | 0    | 0    | 50   | 0    | 0    | 0    | 0    | 0    | 0    | 0    |     |  |
| M00007                          | Pentose phosphate pathway, non-oxidative phase, fructose 6P => ribose 5P                  | 100                         | 100  | 100  | 100  | 25   | 25   | 25   | 25   | 25   | 25   | 25   | 25   | 25   | 25   | 75   | 25   | 25   | 25   | 100  | 25   | 25   | 25   | 25   | 25   | 25   | 100  |     |  |
| M00580                          | Pentose phosphate pathway, archaea, fructose 6P => ribose 5P                              | 100                         | 100  | 100  | 100  | 100  | 100  | 100  | 100  | 100  | 100  | 100  | 100  | 100  | 100  | 100  | 100  | 100  | 100  | 100  | 100  | 100  | 100  | 100  | 100  | 100  | 100  |     |  |
| M00005                          | PRPP biosynthesis, ribose 5P => PRPP                                                      | 100                         | 100  | 100  | 100  | 100  | 100  | 100  | 100  | 100  | 100  | 100  | 100  | 100  | 100  | 100  | 100  | 100  | 100  | 100  | 100  | 100  | 100  | 100  | 100  | 100  | 100  |     |  |
| M00008                          | Entner-Doudoroff pathway, glucose-6P => glyceraldehyde-3P + pyruvate                      | 0                           | 0    | 0    | 0    | 0    | 0    | 0    | 0    | 0    | 0    | 0    | 0    | 0    | 0    | 0    | 0    | 0    | 0    | 0    | 0    | 0    | 0    | 0    | 0    | 0    | 0    |     |  |
| M00308                          | Semi-phosphorylative Entner-Doudoroff pathway, gluconate => glyceraldehyde-3P + pyruvate  | 20                          | 20   | 20   | 20   | 20   | 20   | 20   | 20   | 20   | 20   | 20   | 20   | 20   | 20   | 20   | 20   | 20   | 20   | 20   | 20   | 20   | 20   | 20   | 20   | 25   | 20   |     |  |
| M00633                          | Semi-phosphorylative Entner-Doudoroff pathway, gluconate/galactonate => glyceraldehyde-3P | 0                           | 0    | 0    | 0    | 0    | 0    | 0    | 0    | 0    | 0    | 0    | 0    | 0    | 0    | 0    | 0    | 0    | 0    | 0    | 0    | 0    | 0    | 0    | 0    | 25   | 0    |     |  |
| M00309                          | Non-phosphorylative Entner-Doudoroff pathway, gluconate => glyceraldehyde + pyruvate      | 0                           | 0    | 0    | 0    | 33.3 | 0    | 0    | 33.3 | 33.3 | 33.3 | 33.3 | 0    | 33.3 | 33.3 | 0    | 0    | 0    | 33.3 | 33.3 | 0    | 0    | 0    | 0    | 0    | 0    | 0    |     |  |
| M00012                          | Glyoxylate cycle                                                                          | 20                          | 20   | 20   | 20   | 60   | 20   | 40   | 40   | 40   | 60   | 60   | 20   | 20   | 20   | 20   | 20   | 20   | 0    | 40   | 40   | 20   | 40   | 40   | 20   | 20   | 20   |     |  |
| M00373                          | Ethylmalonyl pathway                                                                      | 7.1                         | 7.1  | 7.1  | 7.1  | 7.1  | 7.1  | 7.1  | 7.1  | 7.1  | 7.1  | 7.1  | 7.1  | 7.1  | 7.1  | 7.1  | 7.1  | 7.1  | 7.1  | 7.1  | 7.1  | 7.1  | 7.1  | 7.1  | 7.1  | 7.1  | 7.1  |     |  |
| M00532                          | Photorespiration                                                                          | 20                          | 20   | 0    | 10   | 40   | 30   | 20   | 20   | 30   | 30   | 30   | 30   | 40   | 20   | 30   | 20   | 20   | 30   | 40   | 10   | 20   | 10   | 10   | 10   | 40   | 40   |     |  |
| M00013                          | Malonate semialdehyde pathway, propanoyl-CoA => Acetyl-CoA                                | 0                           | 0    | 0    | 0    | 0    | 0    | 0    | 0    | 0    | 0    | 0    | 0    | 0    | 0    | 0    | 0    | 0    | 0    | 0    | 0    | 0    | 0    | 0    | 0    | 0    | 0    |     |  |
| M00632                          | Galactose degradation, Leloir pathway, galactose => alpha-D-glucose-1P                    | 25                          | 25   | 25   | 25   | 50   | 50   | 50   | 25   | 25   | 50   | 50   | 50   | 25   | 25   | 25   | 25   | 25   | 25   | 50   | 25   | 25   | 25   | 25   | 25   | 25   | 50   |     |  |





| ID     | Module name                                                                                            | Module completion ratio (%) |      |      |      |      |      |      |      |      |      |      |      |      |      |      |      |      |      |      |      |      |      |      |      |      |      |      |  |
|--------|--------------------------------------------------------------------------------------------------------|-----------------------------|------|------|------|------|------|------|------|------|------|------|------|------|------|------|------|------|------|------|------|------|------|------|------|------|------|------|--|
|        |                                                                                                        | mja                         | mig  | mvn  | mok  | mba  | mbu  | mmh  | mev  | mzh  | mpy  | mhz  | mcj  | mhu  | mha  | mbg  | mpi  | mbn  | mpl  | mpd  | mer  | mth  | mst  | mru  | mel  | mfv  | mka  | max  |  |
| M00016 | Lysine biosynthesis, succinyl-DAP pathway, aspartate => lysine                                         | 88.9                        | 88.9 | 88.9 | 88.9 | 66.7 | 66.7 | 66.7 | 77.8 | 77.8 | 66.7 | 66.7 | 88.9 | 88.9 | 88.9 | 88.9 | 88.9 | 88.9 | 88.9 | 77.8 | 88.9 | 77.8 | 77.8 | 77.8 | 77.8 | 77.8 | 88.9 | 77.8 |  |
| M00525 | Lysine biosynthesis, acetyl-DAP pathway, aspartate => lysine                                           | 66.7                        | 66.7 | 66.7 | 66.7 | 55.6 | 55.6 | 55.6 | 66.7 | 66.7 | 55.6 | 55.6 | 66.7 | 66.7 | 66.7 | 66.7 | 66.7 | 66.7 | 66.7 | 66.7 | 66.7 | 66.7 | 66.7 | 66.7 | 66.7 | 66.7 | 66.7 | 66.7 |  |
| M00526 | Lysine biosynthesis, DAP dehydrogenase pathway, aspartate => lysine                                    | 83.3                        | 83.3 | 100  | 83.3 | 83.3 | 83.3 | 83.3 | 83.3 | 83.3 | 83.3 | 83.3 | 83.3 | 83.3 | 83.3 | 83.3 | 83.3 | 83.3 | 83.3 | 83.3 | 83.3 | 83.3 | 83.3 | 83.3 | 83.3 | 83.3 | 83.3 | 83.3 |  |
| M00527 | Lysine biosynthesis, DAP aminotransferase pathway, aspartate => lysine                                 | 100                         | 100  | 100  | 100  | 85.7 | 85.7 | 85.7 | 100  | 100  | 85.7 | 85.7 | 100  | 100  | 100  | 100  | 100  | 100  | 100  | 100  | 100  | 100  | 100  | 100  | 100  | 85.7 | 100  | 100  |  |
| M00030 | Lysine biosynthesis, AAA pathway, 2-oxoglutarate => 2-aminoadipate => lysine                           | 0                           | 0    | 0    | 0    | 0    | 0    | 0    | 0    | 0    | 0    | 0    | 0    | 0    | 0    | 0    | 12.5 | 0    | 0    | 0    | 0    | 0    | 0    | 0    | 0    | 0    | 0    | 0    |  |
| M00433 | Lysine biosynthesis, 2-oxoglutarate => 2-oxoadipate                                                    | 100                         | 100  | 100  | 100  | 100  | 66.7 | 100  | 100  | 100  | 100  | 100  | 100  | 100  | 100  | 66.7 | 100  | 100  | 100  | 100  | 0    | 100  | 100  | 100  | 100  | 100  | 100  | 0    |  |
| M00031 | Lysine biosynthesis, 2-aminoadipate => lysine                                                          | 0                           | 0    | 0    | 0    | 0    | 0    | 0    | 0    | 0    | 0    | 0    | 0    | 0    | 0    | 0    | 0    | 0    | 0    | 0    | 0    | 0    | 0    | 0    | 0    | 0    | 0    | 0    |  |
| M00032 | Lysine degradation, lysine => saccharopine => acetoacetyl-CoA                                          | 0                           | 0    | 0    | 0    | 0    | 0    | 0    | 0    | 0    | 0    | 0    | 0    | 0    | 0    | 0    | 12.5 | 0    | 0    | 0    | 0    | 0    | 0    | 0    | 0    | 0    | 0    | 0    |  |
| M00608 | 2-oxocarboxylic acid chain extension, 2-oxoglutarate => 2-oxoadipate => 2-oxopimelate => 2-oxosuberate | 100                         | 100  | 100  | 100  | 100  | 66.7 | 100  | 100  | 100  | 100  | 100  | 100  | 100  | 100  | 66.7 | 100  | 100  | 100  | 100  | 0    | 100  | 100  | 100  | 100  | 100  | 100  | 0    |  |
| M00015 | Proline biosynthesis, glutamate => proline                                                             | 0                           | 0    | 0    | 0    | 100  | 100  | 100  | 100  | 100  | 100  | 100  | 0    | 0    | 0    | 50   | 50   | 0    | 0    | 0    | 100  | 0    | 50   | 50   | 50   | 0    | 0    | 100  |  |
| M00028 | Ornithine biosynthesis, glutamate => ornithine                                                         | 100                         | 100  | 100  | 100  | 100  | 100  | 100  | 100  | 100  | 100  | 100  | 100  | 100  | 100  | 100  | 100  | 100  | 100  | 100  | 100  | 100  | 100  | 100  | 100  | 100  | 100  | 100  |  |
| M00029 | Urea cycle                                                                                             | 60                          | 60   | 60   | 60   | 60   | 60   | 60   | 60   | 60   | 60   | 60   | 60   | 60   | 60   | 60   | 60   | 60   | 60   | 80   | 60   | 60   | 60   | 60   | 60   | 60   | 60   | 60   |  |
| M00026 | Histidine biosynthesis, PRPP => histidine                                                              | 88.9                        | 88.9 | 88.9 | 88.9 | 88.9 | 88.9 | 88.9 | 88.9 | 88.9 | 88.9 | 77.8 | 88.9 | 88.9 | 88.9 | 88.9 | 88.9 | 88.9 | 88.9 | 88.9 | 87.5 | 88.9 | 88.9 | 88.9 | 88.9 | 88.9 | 88.9 | 87.5 |  |
| M00045 | Histidine degradation, histidine => N-formiminoglutamate => glutamate                                  | 0                           | 0    | 0    | 0    | 0    | 0    | 0    | 0    | 0    | 0    | 0    | 0    | 0    | 0    | 0    | 0    | 0    | 0    | 0    | 0    | 0    | 0    | 0    | 0    | 0    | 0    | 0    |  |
| M00022 | Shikimate pathway, phosphoenolpyruvate + erythrose-4P => chorismate                                    | 71.4                        | 71.4 | 71.4 | 71.4 | 71.4 | 71.4 | 71.4 | 71.4 | 71.4 | 71.4 | 71.4 | 71.4 | 71.4 | 60   | 42.9 | 42.9 | 60   | 42.9 | 71.4 | 66.7 | 60   | 71.4 | 71.4 | 71.4 | 71.4 | 66.7 |      |  |
| M00023 | Tryptophan biosynthesis, chorismate => tryptophan                                                      | 100                         | 100  | 100  | 100  | 100  | 100  | 100  | 100  | 100  | 100  | 100  | 100  | 100  | 100  | 100  | 100  | 100  | 100  | 100  | 25   | 75   | 100  | 100  | 100  | 100  | 100  |      |  |
| M00024 | Phenylalanine biosynthesis, chorismate => phenylalanine                                                | 66.7                        | 66.7 | 66.7 | 66.7 | 66.7 | 66.7 | 66.7 | 66.7 | 66.7 | 66.7 | 66.7 | 66.7 | 66.7 | 33.3 | 66.7 | 66.7 | 66.7 | 66.7 | 66.7 | 66.7 | 66.7 | 66.7 | 66.7 | 66.7 | 66.7 | 66.7 |      |  |
| M00025 | Tyrosine biosynthesis, chorismate => tyrosine                                                          | 66.7                        | 66.7 | 66.7 | 66.7 | 66.7 | 66.7 | 66.7 | 66.7 | 66.7 | 66.7 | 66.7 | 66.7 | 66.7 | 33.3 | 66.7 | 66.7 | 66.7 | 66.7 | 66.7 | 50   | 66.7 | 66.7 | 66.7 | 66.7 | 66.7 | 33.3 | 66.7 |  |
| M00042 | Catecholamine biosynthesis, tyrosine => dopamine => noradrenaline => adrenaline                        | 25                          | 25   | 25   | 25   | 25   | 25   | 25   | 25   | 25   | 25   | 25   | 25   | 25   | 25   | 25   | 25   | 25   | 25   | 25   | 0    | 25   | 25   | 25   | 25   | 25   | 25   | 0    |  |
| M00044 | Tyrosine degradation, tyrosine => homogentisate                                                        | 0                           | 0    | 0    | 0    | 0    | 0    | 0    | 0    | 0    | 0    | 0    | 0    | 0    | 0    | 0    | 0    | 0    | 0    | 0    | 0    | 0    | 0    | 0    | 0    | 0    | 0    | 0    |  |
| M00038 | Tryptophan metabolism, tryptophan => kynurenine => 2-aminomuconate                                     | 0                           | 0    | 0    | 0    | 14.3 | 0    | 0    | 14.3 | 0    | 14.3 | 14.3 | 14.3 | 0    | 0    | 14.3 | 14.3 | 14.3 | 14.3 | 14.3 | 0    | 0    | 0    | 0    | 0    | 0    | 0    | 0    |  |
| M00027 | GABA (gamma-Aminobutyrate) shunt                                                                       | 0                           | 0    | 0    | 0    | 100  | 33.3 | 33.3 | 33.3 | 33.3 | 33.3 | 33.3 | 33.3 | 33.3 | 0    | 0    | 66.7 | 0    | 0    | 0    | 33.3 | 0    | 0    | 0    | 33.3 | 0    | 0    | 0    |  |
| M00127 | Thiamine biosynthesis, AIR => thiamine-P/thiamine-2P                                                   | 60                          | 60   | 100  | 60   | 100  | 60   | 100  | 60   | 60   | 100  | 100  | 100  | 100  | 100  | 100  | 100  | 80   | 100  | 100  | 100  | 60   | 100  | 100  | 60   | 60   | 60   | 100  |  |
| M00125 | Riboflavin biosynthesis, GTP => riboflavin/FMN/FAD                                                     | 50                          | 50   | 50   | 50   | 50   | 50   | 50   | 50   | 50   | 50   | 66.7 | 50   | 33.3 | 50   | 50   | 50   | 50   | 50   | 50   | 50   | 50   | 50   | 50   | 50   | 50   | 50   | 50   |  |
| M00124 | Pyridoxal biosynthesis, erythrose-4P => pyridoxal-5P                                                   | 0                           | 0    | 0    | 0    | 16.7 | 0    | 0    | 0    | 0    | 0    | 0    | 0    | 0    | 0    | 0    | 0    | 0    | 0    | 0    | 0    | 0    | 0    | 0    | 0    | 0    | 0    | 0    |  |
| M00115 | NAD biosynthesis, aspartate => NAD                                                                     | 60                          | 60   | 60   | 60   | 60   | 60   | 60   | 60   | 60   | 60   | 60   | 60   | 60   | 60   | 60   | 60   | 60   | 60   | 60   | 60   | 60   | 60   | 60   | 60   | 60   | 60   | 60   |  |
| M00622 | Nicotinate degradation, nicotinate => fumarate                                                         | 0                           | 0    | 0    | 0    | 0    | 0    | 0    | 0    | 0    | 0    | 0    | 0    | 0    | 0    | 0    | 0    | 0    | 0    | 0    | 0    | 0    | 0    | 0    | 0    | 0    | 0    | 0    |  |
| M00119 | Pantothenate biosynthesis, valine/L-aspartate => pantothenate                                          | 20                          | 20   | 40   | 20   | 20   | 20   | 20   | 20   | 20   | 20   | 40   | 40   | 20   | 40   | 40   | 40   | 40   | 20   | 40   | 60   | 20   | 40   | 40   | 40   | 20   | 20   | 40   |  |



| ID                              | Module name                                                    | Module completion ratio (%) |      |      |      |      |      |      |      |      |      |      |      |      |      |      |      |      |      |      |      |      |      |      |      |      |      |      |  |
|---------------------------------|----------------------------------------------------------------|-----------------------------|------|------|------|------|------|------|------|------|------|------|------|------|------|------|------|------|------|------|------|------|------|------|------|------|------|------|--|
|                                 |                                                                | mja                         | mig  | mvn  | mok  | mba  | mbu  | mmh  | mev  | mzh  | mpy  | mhz  | mcj  | mhu  | mha  | mbg  | mpi  | mbn  | mpl  | mpd  | mer  | mth  | mst  | mru  | mel  | mfv  | mka  | max  |  |
| Structural complex              |                                                                |                             |      |      |      |      |      |      |      |      |      |      |      |      |      |      |      |      |      |      |      |      |      |      |      |      |      |      |  |
| Energy metabolism               |                                                                |                             |      |      |      |      |      |      |      |      |      |      |      |      |      |      |      |      |      |      |      |      |      |      |      |      |      |      |  |
| M00163                          | Photosystem I                                                  | 0                           | 0    | 0    | 0    | 0    | 0    | 0    | 0    | 0    | 0    | 0    | 0    | 0    | 0    | 0    | 0    | 0    | 0    | 0    | 0    | 0    | 0    | 0    | 0    | 0    | 0    | 0    |  |
| M00144                          | NADH:quinone oxidoreductase, prokaryotes                       | 0                           | 0    | 0    | 0    | 78.6 | 71.4 | 78.6 | 78.6 | 71.4 | 78.6 | 71.4 | 76.9 | 9.1  | 0    | 0    | 0    | 0    | 18.2 | 9.1  | 64.3 | 18.2 | 0    | 0    | 18.2 | 25   | 0    | 64.3 |  |
| M00145                          | NAD(P)H:quinone oxidoreductase, chloroplasts and cyanobacteria | 0                           | 0    | 0    | 0    | 0    | 0    | 0    | 0    | 0    | 0    | 0    | 0    | 0    | 0    | 0    | 0    | 0    | 0    | 0    | 9.1  | 0    | 0    | 0    | 0    | 0    | 0    |      |  |
| M00149                          | Succinate dehydrogenase, prokaryotes                           | 0                           | 0    | 0    | 0    | 0    | 25   | 50   | 50   | 50   | 0    | 0    | 0    | 0    | 0    | 0    | 0    | 0    | 0    | 0    | 0    | 0    | 0    | 0    | 50   | 0    | 0    |      |  |
| M00150                          | Fumarate reductase, prokaryotes                                | 0                           | 0    | 0    | 0    | 0    | 0    | 0    | 0    | 0    | 0    | 0    | 0    | 0    | 0    | 0    | 0    | 0    | 0    | 0    | 0    | 0    | 0    | 0    | 0    | 0    | 0    |      |  |
| M00162                          | Cytochrome b6f complex                                         | 0                           | 0    | 0    | 0    | 0    | 0    | 0    | 0    | 0    | 0    | 0    | 0    | 0    | 0    | 0    | 0    | 0    | 0    | 0    | 0    | 0    | 0    | 0    | 0    | 0    | 0    |      |  |
| M00151                          | Cytochrome bc1 complex respiratory unit                        | 0                           | 0    | 0    | 0    | 0    | 0    | 0    | 0    | 0    | 0    | 0    | 0    | 0    | 0    | 0    | 0    | 0    | 0    | 0    | 0    | 0    | 0    | 0    | 0    | 0    | 0    |      |  |
| M00152                          | Cytochrome bc1 complex                                         | 0                           | 0    | 0    | 0    | 0    | 0    | 0    | 0    | 0    | 0    | 0    | 0    | 0    | 0    | 0    | 0    | 0    | 0    | 0    | 0    | 0    | 0    | 0    | 0    | 0    | 0    |      |  |
| M00154                          | Cytochrome c oxidase                                           | 0                           | 0    | 0    | 0    | 0    | 0    | 0    | 0    | 0    | 0    | 0    | 0    | 0    | 0    | 0    | 0    | 0    | 0    | 0    | 0    | 0    | 0    | 0    | 0    | 0    | 0    |      |  |
| M00155                          | Cytochrome c oxidase, prokaryotes                              | 0                           | 0    | 0    | 0    | 0    | 0    | 0    | 0    | 0    | 0    | 0    | 0    | 0    | 0    | 0    | 0    | 0    | 0    | 0    | 0    | 0    | 0    | 0    | 0    | 0    | 0    |      |  |
| M00153                          | Cytochrome d ubiquinol oxidase                                 | 0                           | 0    | 0    | 0    | 100  | 0    | 0    | 0    | 0    | 0    | 0    | 0    | 0    | 0    | 0    | 0    | 0    | 0    | 0    | 0    | 0    | 0    | 0    | 0    | 0    | 0    |      |  |
| M00416                          | Cytochrome aa3-600 menaquinol oxidase                          | 0                           | 0    | 0    | 0    | 0    | 0    | 0    | 0    | 0    | 0    | 0    | 0    | 0    | 0    | 0    | 0    | 0    | 0    | 0    | 0    | 0    | 0    | 0    | 0    | 0    | 0    |      |  |
| M00157                          | F-type ATPase, prokaryotes and chloroplasts                    | 0                           | 0    | 0    | 0    | 87.5 | 0    | 0    | 0    | 0    | 0    | 0    | 0    | 0    | 0    | 0    | 0    | 0    | 0    | 0    | 0    | 0    | 0    | 0    | 0    | 0    | 0    |      |  |
| M00159                          | V-type ATPase, prokaryotes                                     | 100                         | 100  | 100  | 87.5 | 100  | 100  | 100  | 100  | 100  | 100  | 100  | 100  | 100  | 100  | 100  | 100  | 100  | 100  | 100  | 100  | 100  | 100  | 100  | 100  | 100  | 100  |      |  |
| Carbohydrate & lipid metabolism |                                                                |                             |      |      |      |      |      |      |      |      |      |      |      |      |      |      |      |      |      |      |      |      |      |      |      |      |      |      |  |
| M00310                          | Pyruvate:ferredoxin oxidoreductase                             | 100                         | 100  | 100  | 100  | 100  | 100  | 100  | 100  | 100  | 100  | 100  | 100  | 100  | 100  | 100  | 100  | 100  | 100  | 100  | 100  | 75   | 100  | 100  | 100  | 100  | 100  |      |  |
| M00311                          | 2-oxoglutarate:ferredoxin oxidoreductase                       | 100                         | 100  | 100  | 100  | 50   | 50   | 50   | 50   | 50   | 50   | 50   | 50   | 100  | 100  | 100  | 100  | 100  | 100  | 0    | 100  | 100  | 100  | 100  | 100  | 100  | 0    |      |  |
| M00312                          | 2-oxoisovalerate:ferredoxin oxidoreductase                     | 0                           | 0    | 75   | 0    | 75   | 75   | 75   | 0    | 75   | 75   | 75   | 25   | 0    | 0    | 0    | 0    | 0    | 0    | 50   | 75   | 0    | 75   | 75   | 75   | 0    | 0    |      |  |
| M00313                          | indolepyruvate:ferredoxin oxidoreductase                       | 0                           | 0    | 100  | 0    | 100  | 100  | 100  | 100  | 100  | 100  | 100  | 100  | 100  | 100  | 100  | 100  | 100  | 100  | 100  | 100  | 100  | 100  | 100  | 0    | 0    | 100  |      |  |
| M00072                          | Oligosaccharyltransferase                                      | 16.7                        | 16.7 | 16.7 | 16.7 | 16.7 | 16.7 | 16.7 | 16.7 | 16.7 | 16.7 | 16.7 | 16.7 | 16.7 | 16.7 | 16.7 | 16.7 | 16.7 | 16.7 | 16.7 | 16.7 | 16.7 | 16.7 | 16.7 | 16.7 | 0    | 0    |      |  |
| Genetic information processing  |                                                                |                             |      |      |      |      |      |      |      |      |      |      |      |      |      |      |      |      |      |      |      |      |      |      |      |      |      |      |  |
| M00260                          | DNA polymerase III complex, bacteria                           | 0                           | 0    | 0    | 0    | 0    | 0    | 0    | 0    | 16.7 | 0    | 0    | 0    | 0    | 16.7 | 0    | 0    | 0    | 16.7 | 16.7 | 0    | 0    | 0    | 16.7 | 0    | 0    | 16.7 |      |  |
| M00264                          | DNA polymerase II complex, archaea                             | 100                         | 100  | 100  | 100  | 100  | 50   | 100  | 100  | 100  | 100  | 100  | 100  | 100  | 100  | 100  | 100  | 100  | 100  | 100  | 100  | 100  | 100  | 100  | 100  | 100  | 100  |      |  |
| M00261                          | DNA polymerase alpha / primase complex                         | 25                          | 25   | 25   | 25   | 25   | 25   | 25   | 25   | 25   | 25   | 25   | 25   | 25   | 25   | 25   | 25   | 25   | 25   | 25   | 25   | 25   | 25   | 25   | 25   | 25   | 25   |      |  |
| M00288                          | RPA complex                                                    | 33.3                        | 33.3 | 33.3 | 33.3 | 33.3 | 33.3 | 33.3 | 33.3 | 33.3 | 33.3 | 33.3 | 33.3 | 33.3 | 33.3 | 33.3 | 33.3 | 33.3 | 33.3 | 33.3 | 33.3 | 33.3 | 33.3 | 33.3 | 33.3 | 33.3 | 33.3 |      |  |
| M00290                          | Holo-TFIID complex                                             | 0                           | 0    | 0    | 0    | 10   | 10   | 10   | 10   | 10   | 10   | 10   | 10   | 10   | 10   | 10   | 10   | 10   | 10   | 10   | 10   | 0    | 0    | 0    | 0    | 0    | 10   |      |  |









| ID                                   | Module name                                                                     | Module completion ratio (%) |      |      |      |      |      |      |      |      |      |      |      |      |      |      |      |      |      |      |      |      |      |      |      |      |      |      |  |
|--------------------------------------|---------------------------------------------------------------------------------|-----------------------------|------|------|------|------|------|------|------|------|------|------|------|------|------|------|------|------|------|------|------|------|------|------|------|------|------|------|--|
|                                      |                                                                                 | mja                         | mig  | mvn  | mok  | mba  | mbu  | mmh  | mev  | mzh  | mpy  | mhz  | mcj  | mhu  | mha  | mbg  | mpi  | mbn  | mpl  | mpd  | mer  | mth  | mst  | mrp  | mel  | mfv  | mka  | max  |  |
| Functional set                       |                                                                                 |                             |      |      |      |      |      |      |      |      |      |      |      |      |      |      |      |      |      |      |      |      |      |      |      |      |      |      |  |
| Metabolism                           |                                                                                 |                             |      |      |      |      |      |      |      |      |      |      |      |      |      |      |      |      |      |      |      |      |      |      |      |      |      |      |  |
| M00360                               | Aminoacyl-tRNA biosynthesis, prokaryotes                                        | 94.4                        | 94.4 | 100  | 100  | 100  | 94.4 | 100  | 100  | 100  | 100  | 100  | 94.4 | 100  | 94.4 | 88.9 | 94.4 | 100  | 100  | 100  | 100  | 94.4 | 100  | 100  | 94.4 | 94.4 | 100  |      |  |
| M00359                               | Aminoacyl-tRNA biosynthesis, eukaryotes                                         | 80                          | 80   | 85   | 85   | 90   | 80   | 85   | 85   | 85   | 85   | 85   | 80   | 90   | 80   | 80   | 80   | 90   | 90   | 90   | 85   | 80   | 85   | 85   | 85   | 80   | 80   | 85   |  |
| M00362                               | Nucleotide sugar biosynthesis, prokaryotes                                      | 71.4                        | 85.7 | 71.4 | 85.7 | 100  | 100  | 85.7 | 57.1 | 71.4 | 85.7 | 100  | 71.4 | 85.7 | 57.1 | 57.1 | 42.9 | 71.4 | 57.1 | 85.7 | 42.9 | 71.4 | 71.4 | 71.4 | 71.4 | 71.4 | 42.9 | 28.6 |  |
| M00361                               | Nucleotide sugar biosynthesis, eukaryotes                                       | 50                          | 50   | 50   | 50   | 66.7 | 66.7 | 66.7 | 50   | 50   | 50   | 66.7 | 33.3 | 66.7 | 50   | 33.3 | 50   | 66.7 | 33.3 | 50   | 33.3 | 50   | 50   | 50   | 50   | 50   | 33.3 | 33.3 |  |
| Environmental information processing |                                                                                 |                             |      |      |      |      |      |      |      |      |      |      |      |      |      |      |      |      |      |      |      |      |      |      |      |      |      |      |  |
| M00454                               | KdpD-KdpE (potassium transport) two-component regulatory system                 | 0                           | 0    | 0    | 0    | 0    | 0    | 0    | 0    | 0    | 0    | 0    | 0    | 0    | 0    | 50   | 0    | 50   | 50   | 0    | 0    | 0    | 0    | 0    | 50   | 0    | 0    | 0    |  |
| M00459                               | VicK-VicR (cell wall metabolism) two-component regulatory system                | 0                           | 0    | 0    | 0    | 0    | 0    | 0    | 0    | 0    | 50   | 0    | 0    | 0    | 0    | 0    | 0    | 0    | 0    | 0    | 0    | 0    | 0    | 0    | 0    | 0    | 0    | 0    |  |
| M00460                               | MprB-MprA (maintenance of persistent infection two-component regulatory system) | 0                           | 0    | 0    | 0    | 0    | 0    | 0    | 0    | 0    | 0    | 0    | 0    | 0    | 0    | 0    | 0    | 0    | 0    | 0    | 0    | 0    | 0    | 0    | 0    | 0    | 0    | 0    |  |
| M00506                               | CheA-CheYBV (chemotaxis) two-component regulatory system                        | 0                           | 0    | 60   | 60   | 80   | 80   | 0    | 60   | 60   | 80   | 60   | 0    | 60   | 0    | 60   | 60   | 80   | 80   | 40   | 0    | 0    | 0    | 0    | 20   | 0    | 0    | 0    |  |
| M00507                               | ChpA-ChpB/PilGH (chemosensory) two-component regulatory system                  | 0                           | 0    | 0    | 0    | 0    | 0    | 0    | 0    | 0    | 0    | 0    | 0    | 0    | 0    | 0    | 20   | 0    | 0    | 0    | 0    | 0    | 0    | 0    | 0    | 0    | 0    | 0    |  |
| M00511                               | PleC-PleD (cell fate control) two-component regulatory system                   | 0                           | 0    | 0    | 0    | 0    | 0    | 16.7 | 16.7 | 0    | 16.7 | 16.7 | 0    | 0    | 0    | 0    | 0    | 0    | 0    | 0    | 0    | 0    | 0    | 0    | 0    | 0    | 0    | 0    |  |
| M00520                               | ChvG-ChvI (acidity sensing) two-component regulatory system                     | 0                           | 0    | 0    | 0    | 0    | 0    | 0    | 0    | 0    | 0    | 0    | 0    | 0    | 0    | 0    | 0    | 0    | 0    | 0    | 0    | 0    | 0    | 0    | 0    | 0    | 0    | 0    |  |

Full species name of each abbreviation is described in Table S2.

**Table S3** Module completion patterns in 79 archaeal species listed in Table S2 (continued: Halophilic and other euryarchaeota).

| ID                | Module name                                                               | Module completion ratio (%) |      |      |      |      |      |      |      |      |      |      |      |      |      |      |      |      |      |      |      |      |      |      |      |      |     |  |  |
|-------------------|---------------------------------------------------------------------------|-----------------------------|------|------|------|------|------|------|------|------|------|------|------|------|------|------|------|------|------|------|------|------|------|------|------|------|-----|--|--|
|                   |                                                                           | afu                         | fpl  | hsl  | hma  | hwa  | nph  | hla  | hut  | hmu  | htu  | nmg  | hvo  | hje  | hbo  | hxa  | npe  | nge  | hru  | nou  | sali | tac  | pto  | fac  | pfu  | tko  | abi |  |  |
| Pathway module    |                                                                           |                             |      |      |      |      |      |      |      |      |      |      |      |      |      |      |      |      |      |      |      |      |      |      |      |      |     |  |  |
| Energy metabolism |                                                                           |                             |      |      |      |      |      |      |      |      |      |      |      |      |      |      |      |      |      |      |      |      |      |      |      |      |     |  |  |
| M00165            | Reductive pentose phosphate cycle (Calvin cycle)                          | 36.4                        | 45.5 | 36.4 | 36.4 | 36.4 | 45.5 | 36.4 | 63.6 | 45.5 | 36.4 | 45.5 | 63.6 | 36.4 | 63.6 | 36.4 | 36.4 | 36.4 | 36.4 | 36.4 | 45.5 | 45.5 | 45.5 | 54.5 | 54.5 | 63.6 |     |  |  |
| M00166            | Reductive pentose phosphate cycle, ribulose-5P => glyceraldehyde-3P       | 75                          | 100  | 50   | 50   | 50   | 75   | 50   | 50   | 75   | 50   | 75   | 75   | 50   | 75   | 50   | 50   | 50   | 50   | 50   | 50   | 50   | 50   | 75   | 75   | 100  |     |  |  |
| M00167            | Reductive pentose phosphate cycle, glyceraldehyde-3P => ribulose-5P       | 14.3                        | 14.3 | 28.6 | 28.6 | 28.6 | 28.6 | 28.6 | 71.4 | 28.6 | 28.6 | 28.6 | 57.1 | 28.6 | 57.1 | 28.6 | 28.6 | 28.6 | 28.6 | 28.6 | 28.6 | 42.9 | 42.9 | 42.9 | 42.9 | 42.9 |     |  |  |
| M00168            | CAM (Crassulacean acid metabolism), dark                                  | 100                         | 100  | 100  | 100  | 100  | 50   | 100  | 50   | 100  | 100  | 100  | 100  | 100  | 100  | 100  | 100  | 100  | 50   | 100  | 100  | 50   | 100  | 100  | 50   | 0    |     |  |  |
| M00169            | CAM (Crassulacean acid metabolism), light                                 | 0                           | 0    | 50   | 50   | 50   | 50   | 50   | 50   | 50   | 50   | 50   | 50   | 50   | 50   | 50   | 50   | 50   | 50   | 50   | 50   | 0    | 0    | 0    | 0    | 50   |     |  |  |
| M00172            | C4-dicarboxylic acid cycle, NADP - malic enzyme type                      | 25                          | 25   | 50   | 50   | 50   | 25   | 50   | 50   | 50   | 50   | 50   | 50   | 50   | 50   | 50   | 50   | 50   | 25   | 50   | 50   | 25   | 25   | 25   | 25   | 0    |     |  |  |
| M00171            | C4-dicarboxylic acid cycle, NAD - malic enzyme type                       | 14.3                        | 14.3 | 14.3 | 14.3 | 14.3 | 0    | 14.3 | 14.3 | 14.3 | 14.3 | 14.3 | 14.3 | 14.3 | 14.3 | 14.3 | 14.3 | 14.3 | 0    | 14.3 | 14.3 | 14.3 | 14.3 | 14.3 | 14.3 | 0    |     |  |  |
| M00170            | C4-dicarboxylic acid cycle, phosphoenolpyruvate carboxykinase type        | 25                          | 25   | 25   | 25   | 25   | 0    | 50   | 25   | 25   | 50   | 50   | 25   | 50   | 25   | 50   | 50   | 50   | 25   | 50   | 25   | 0    | 25   | 25   | 25   | 0    |     |  |  |
| M00173            | Reductive citrate cycle (Arnon-Buchanan cycle)                            | 81.8                        | 81.8 | 81.8 | 81.8 | 81.8 | 72.7 | 81.8 | 72.7 | 81.8 | 81.8 | 81.8 | 81.8 | 81.8 | 81.8 | 81.8 | 81.8 | 81.8 | 72.7 | 81.8 | 81.8 | 72.7 | 81.8 | 72.7 | 54.5 | 27.3 |     |  |  |
| M00376            | 3-Hydroxypropionate bi-cycle                                              | 18.8                        | 25   | 25   | 25   | 25   | 25   | 25   | 12.5 | 25   | 25   | 25   | 25   | 25   | 25   | 25   | 25   | 25   | 25   | 25   | 25   | 22.2 | 22.2 | 11.1 | 18.8 | 18.8 |     |  |  |
| M00375            | Hydroxypropionate-hydroxybutylate cycle                                   | 33.3                        | 33.3 | 33.3 | 33.3 | 16.7 | 25   | 33.3 | 8.3  | 33.3 | 33.3 | 33.3 | 33.3 | 33.3 | 33.3 | 33.3 | 33.3 | 33.3 | 33.3 | 33.3 | 33.3 | 28.6 | 28.6 | 21.4 | 25   | 25   |     |  |  |
| M00374            | Dicarboxylate-hydroxybutyrate cycle                                       | 76.9                        | 69.2 | 61.5 | 61.5 | 46.2 | 46.2 | 61.5 | 46.2 | 61.5 | 61.5 | 61.5 | 61.5 | 61.5 | 61.5 | 61.5 | 61.5 | 61.5 | 53.8 | 61.5 | 61.5 | 46.2 | 61.5 | 53.8 | 30.8 | 23.1 |     |  |  |
| M00377            | Reductive acetyl-CoA pathway (Wood-Ljungdahl pathway)                     | 14.3                        | 14.3 | 14.3 | 42.9 | 42.9 | 14.3 | 28.6 | 14.3 | 14.3 | 14.3 | 14.3 | 14.3 | 14.3 | 28.6 | 14.3 | 14.3 | 42.9 | 14.3 | 42.9 | 14.3 | 28.6 | 28.6 | 28.6 | 0    | 28.6 |     |  |  |
| M00579            | Phosphate acetyltransferase-acetate kinase pathway, acetyl-CoA => acetate | 0                           | 0    | 0    | 0    | 0    | 0    | 0    | 0    | 0    | 0    | 0    | 0    | 0    | 0    | 0    | 0    | 0    | 0    | 0    | 0    | 0    | 0    | 0    | 0    | 0    |     |  |  |
| M00175            | Nitrogen fixation, nitrogen => ammonia                                    | 0                           | 0    | 0    | 0    | 0    | 0    | 0    | 0    | 0    | 0    | 0    | 0    | 0    | 0    | 0    | 0    | 0    | 0    | 0    | 0    | 0    | 0    | 0    | 0    | 0    |     |  |  |
| M00531            | Assimilatory nitrate reduction, nitrate => ammonia                        | 50                          | 50   | 0    | 100  | 100  | 100  | 100  | 50   | 50   | 100  | 50   | 100  | 100  | 50   | 100  | 100  | 0    | 0    | 100  | 50   | 0    | 0    | 0    | 0    | 0    |     |  |  |
| M00530            | Dissimilatory nitrate reduction, nitrate => ammonia                       | 0                           | 50   | 0    | 0    | 0    | 0    | 0    | 0    | 0    | 0    | 0    | 0    | 0    | 0    | 0    | 0    | 0    | 0    | 0    | 0    | 0    | 0    | 0    | 0    | 0    |     |  |  |
| M00529            | Denitrification, nitrate => nitrogen                                      | 0                           | 75   | 0    | 50   | 0    | 25   | 25   | 25   | 25   | 25   | 0    | 25   | 0    | 50   | 50   | 25   | 0    | 25   | 25   | 25   | 0    | 0    | 0    | 0    | 0    |     |  |  |
| M00528            | Nitrification, ammonia => nitrite                                         | 0                           | 0    | 0    | 0    | 0    | 0    | 0    | 0    | 0    | 0    | 0    | 0    | 0    | 0    | 0    | 0    | 0    | 0    | 0    | 0    | 0    | 0    | 0    | 0    | 0    |     |  |  |
| M00567            | Methanogenesis, CO2 => methane                                            | 75                          | 75   | 12.5 | 25   | 25   | 25   | 25   | 25   | 25   | 25   | 25   | 25   | 25   | 25   | 25   | 25   | 25   | 25   | 25   | 25   | 0    | 0    | 0    | 0    | 12.5 |     |  |  |
| M00357            | Methanogenesis, acetate => methane                                        | 60                          | 60   | 20   | 20   | 20   | 20   | 20   | 20   | 20   | 20   | 20   | 20   | 20   | 20   | 20   | 20   | 20   | 20   | 20   | 20   | 20   | 20   | 20   | 0    | 20   |     |  |  |
| M00356            | Methanogenesis, methanol => methane                                       | 33.3                        | 33.3 | 0    | 0    | 0    | 0    | 0    | 0    | 0    | 0    | 0    | 0    | 0    | 0    | 0    | 0    | 0    | 0    | 0    | 0    | 0    | 0    | 0    | 0    | 33.3 |     |  |  |
| M00563            | Methanogenesis, mono-/di-/tri-methylamine => methane                      | 25                          | 25   | 0    | 0    | 0    | 0    | 0    | 0    | 0    | 0    | 0    | 0    | 0    | 0    | 0    | 0    | 0    | 0    | 0    | 0    | 0    | 0    | 0    | 0    | 25   |     |  |  |
| M00358            | Coenzyme M biosynthesis                                                   | 0                           | 0    | 0    | 0    | 0    | 0    | 0    | 0    | 0    | 0    | 0    | 25   | 0    | 0    | 0    | 0    | 0    | 0    | 0    | 0    | 25   | 25   | 25   | 0    | 0    |     |  |  |
| M00174            | Methane oxidation, methanotroph, methane => formaldehyde                  | 0                           | 0    | 0    | 0    | 0    | 0    | 0    | 0    | 0    | 0    | 0    | 0    | 0    | 0    | 0    | 0    | 0    | 0    | 0    | 0    | 0    | 0    | 0    | 0    | 0    |     |  |  |
| M00346            | Formaldehyde assimilation, serine pathway                                 | 44.4                        | 44.4 | 44.4 | 55.6 | 44.4 | 44.4 | 55.6 | 33.3 | 44.4 | 55.6 | 55.6 | 55.6 | 55.6 | 44.4 | 55.6 | 55.6 | 55.6 | 44.4 | 55.6 | 55.6 | 66.7 | 55.6 | 44.4 | 22.2 | 22.2 |     |  |  |

| ID                              | Module name                                                                              | Module completion ratio (%) |      |      |      |      |      |      |      |      |      |      |      |      |      |      |      |      |      |      |      |      |      |      |      |      |      |
|---------------------------------|------------------------------------------------------------------------------------------|-----------------------------|------|------|------|------|------|------|------|------|------|------|------|------|------|------|------|------|------|------|------|------|------|------|------|------|------|
|                                 |                                                                                          | afu                         | fpl  | hsl  | hma  | hwa  | nph  | hla  | hut  | hmu  | htu  | nmg  | hvo  | hje  | hbo  | hxa  | npe  | nge  | hru  | nou  | sali | tac  | pto  | fac  | pfu  | tko  | abi  |
| M00345                          | Formaldehyde assimilation, ribulose monophosphate pathway                                | 50                          | 50   | 0    | 0    | 0    | 0    | 0    | 33.3 | 0    | 0    | 0    | 33.3 | 0    | 33.3 | 0    | 0    | 0    | 0    | 0    | 0    | 0    | 33.3 | 0    | 33.3 | 33.3 | 33.3 |
| M00344                          | Formaldehyde assimilation, xylulose monophosphate pathway                                | 0                           | 0    | 25   | 25   | 25   | 25   | 25   | 25   | 25   | 25   | 25   | 50   | 25   | 50   | 25   | 25   | 25   | 25   | 25   | 25   | 0    | 0    | 0    | 0    | 0    |      |
| M00378                          | F420 biosynthesis                                                                        | 80                          | 80   | 60   | 60   | 40   | 60   | 60   | 60   | 60   | 60   | 60   | 60   | 60   | 60   | 60   | 60   | 60   | 60   | 60   | 0    | 0    | 0    | 0    | 0    | 0    |      |
| M00422                          | Acetyl-CoA pathway, CO2 => acetyl-CoA                                                    | 100                         | 100  | 0    | 0    | 0    | 0    | 0    | 0    | 0    | 0    | 0    | 0    | 0    | 0    | 0    | 0    | 0    | 0    | 0    | 0    | 0    | 0    | 0    | 0    | 0    |      |
| M00176                          | Assimilatory sulfate reduction, sulfate => H2S                                           | 33.3                        | 33.3 | 33.3 | 33.3 | 33.3 | 33.3 | 33.3 | 33.3 | 33.3 | 33.3 | 33.3 | 33.3 | 33.3 | 33.3 | 33.3 | 33.3 | 33.3 | 33.3 | 33.3 | 0    | 0    | 33.3 | 33.3 | 33.3 | 66.7 |      |
| M00596                          | Dissimilatory sulfate reduction, sulfate => H2S                                          | 100                         | 66.7 | 0    | 0    | 0    | 0    | 0    | 0    | 0    | 0    | 0    | 0    | 0    | 0    | 0    | 0    | 0    | 0    | 0    | 0    | 0    | 0    | 33.3 | 33.3 | 0    | 33.3 |
| Carbohydrate & lipid metabolism |                                                                                          |                             |      |      |      |      |      |      |      |      |      |      |      |      |      |      |      |      |      |      |      |      |      |      |      |      |      |
| M00001                          | Glycolysis (Embden-Meyerhof pathway), glucose => pyruvate                                | 70                          | 90   | 90   | 90   | 90   | 80   | 90   | 90   | 90   | 90   | 100  | 90   | 90   | 90   | 90   | 100  | 100  | 90   | 90   | 80   | 90   | 80   | 100  | 100  | 80   |      |
| M00002                          | Glycolysis, core module involving three-carbon compounds                                 | 83.3                        | 100  | 100  | 100  | 100  | 100  | 100  | 100  | 100  | 100  | 100  | 100  | 100  | 100  | 100  | 100  | 100  | 100  | 100  | 100  | 100  | 100  | 100  | 100  | 100  |      |
| M00003                          | Gluconeogenesis, oxaloacetate => fructose-6P                                             | 62.5                        | 62.5 | 50   | 62.5 | 62.5 | 50   | 75   | 62.5 | 62.5 | 100  | 100  | 87.5 | 100  | 75   | 100  | 100  | 100  | 87.5 | 75   | 62.5 | 100  | 62.5 | 100  | 100  | 100  |      |
| M00307                          | Pyruvate oxidation, pyruvate => acetyl-CoA                                               | 100                         | 100  | 100  | 100  | 0    | 100  | 100  | 100  | 100  | 100  | 100  | 100  | 100  | 100  | 100  | 100  | 100  | 100  | 100  | 100  | 100  | 0    | 0    | 0    | 100  |      |
| M00009                          | Citrate cycle (TCA cycle, Krebs cycle)                                                   | 87.5                        | 75   | 87.5 | 87.5 | 87.5 | 87.5 | 87.5 | 87.5 | 87.5 | 87.5 | 87.5 | 87.5 | 87.5 | 87.5 | 87.5 | 87.5 | 87.5 | 87.5 | 87.5 | 87.5 | 75   | 62.5 | 62.5 | 25   | 62.5 |      |
| M00010                          | Citrate cycle, first carbon oxidation, oxaloacetate => 2-oxoglutarate                    | 66.7                        | 66.7 | 100  | 100  | 100  | 100  | 100  | 100  | 100  | 100  | 100  | 100  | 100  | 100  | 100  | 100  | 100  | 100  | 100  | 100  | 100  | 100  | 100  | 0    | 66.7 |      |
| M00011                          | Citrate cycle, second carbon oxidation, 2-oxoglutarate => oxaloacetate                   | 100                         | 80   | 80   | 80   | 80   | 80   | 80   | 80   | 80   | 80   | 80   | 80   | 80   | 80   | 80   | 80   | 80   | 80   | 80   | 80   | 60   | 40   | 40   | 40   | 60   |      |
| M00004                          | Pentose phosphate pathway (Pentose phosphate cycle)                                      | 28.6                        | 28.6 | 42.9 | 42.9 | 42.9 | 42.9 | 42.9 | 71.4 | 42.9 | 42.9 | 42.9 | 42.9 | 42.9 | 42.9 | 42.9 | 42.9 | 42.9 | 42.9 | 42.9 | 50   | 71.4 | 71.4 | 71.4 | 42.9 | 71.4 |      |
| M00006                          | Pentose phosphate pathway, oxidative phase, glucose 6P => ribulose 5P                    | 0                           | 0    | 50   | 50   | 50   | 50   | 50   | 0    | 50   | 50   | 50   | 50   | 50   | 50   | 50   | 50   | 50   | 50   | 50   | 66.7 | 0    | 0    | 0    | 0    | 0    |      |
| M00007                          | Pentose phosphate pathway, non-oxidative phase, fructose 6P => ribose 5P                 | 25                          | 25   | 25   | 25   | 25   | 25   | 25   | 100  | 25   | 25   | 25   | 25   | 25   | 25   | 25   | 25   | 25   | 25   | 25   | 25   | 100  | 100  | 100  | 50   | 100  |      |
| M00580                          | Pentose phosphate pathway, archaea, fructose 6P => ribose 5P                             | 100                         | 100  | 50   | 50   | 50   | 50   | 50   | 50   | 50   | 50   | 50   | 50   | 50   | 50   | 50   | 50   | 50   | 50   | 50   | 50   | 50   | 50   | 100  | 100  | 100  |      |
| M00005                          | PRPP biosynthesis, ribose 5P => PRPP                                                     | 100                         | 100  | 100  | 100  | 100  | 100  | 100  | 100  | 100  | 100  | 100  | 100  | 100  | 100  | 100  | 100  | 100  | 100  | 100  | 100  | 100  | 100  | 100  | 100  | 100  |      |
| M00008                          | Entner-Doudoroff pathway, glucose-6P => glyceraldehyde-3P + pyruvate                     | 0                           | 0    | 0    | 25   | 25   | 0    | 25   | 25   | 25   | 25   | 25   | 25   | 0    | 25   | 25   | 0    | 25   | 25   | 25   | 50   | 0    | 0    | 0    | 0    | 0    |      |
| M00308                          | Semi-phosphorylative Entner-Doudoroff pathway, gluconate => glyceraldehyde-3P + pyruvate | 20                          | 20   | 75   | 100  | 100  | 20   | 100  | 80   | 100  | 100  | 100  | 100  | 80   | 100  | 100  | 75   | 100  | 100  | 100  | 40   | 40   | 40   | 25   | 25   | 20   |      |
| M00633                          | Semi-phosphorylative Entner-Doudoroff pathway, gluconate/galactonate => glycerate-3P     | 0                           | 0    | 75   | 25   | 25   | 0    | 25   | 0    | 25   | 50   | 50   | 25   | 25   | 25   | 50   | 25   | 25   | 25   | 25   | 50   | 50   | 50   | 25   | 25   | 0    |      |
| M00309                          | Non-phosphorylative Entner-Doudoroff pathway, gluconate => glyceraldehyde + pyruvate     | 33.3                        | 33.3 | 66.7 | 66.7 | 33.3 | 33.3 | 66.7 | 0    | 33.3 | 66.7 | 66.7 | 66.7 | 66.7 | 66.7 | 66.7 | 66.7 | 66.7 | 33.3 | 66.7 | 33.3 | 100  | 100  | 100  | 33.3 | 33.3 | 33.3 |
| M00012                          | Glyoxylate cycle                                                                         | 40                          | 40   | 60   | 60   | 80   | 60   | 60   | 40   | 60   | 60   | 60   | 60   | 60   | 60   | 60   | 60   | 60   | 60   | 60   | 60   | 60   | 60   | 40   | 0    | 20   |      |
| M00373                          | Ethylmalonyl pathway                                                                     | 7.1                         | 21.4 | 21.4 | 21.4 | 14.3 | 14.3 | 21.4 | 7.1  | 21.4 | 21.4 | 21.4 | 21.4 | 21.4 | 21.4 | 21.4 | 21.4 | 21.4 | 28.6 | 21.4 | 21.4 | 7.1  | 7.1  | 7.1  | 21.4 | 21.4 | 21.4 |
| M00532                          | Photorespiration                                                                         | 20                          | 30   | 30   | 40   | 20   | 50   | 40   | 20   | 40   | 50   | 60   | 50   | 40   | 40   | 50   | 40   | 40   | 50   | 50   | 40   | 40   | 40   | 20   | 30   | 40   |      |
| M00013                          | Malonate semialdehyde pathway, propanoyl-CoA => Acetyl-CoA                               | 25                          | 25   | 0    | 25   | 0    | 25   | 25   | 0    | 25   | 50   | 50   | 25   | 25   | 25   | 0    | 50   | 25   | 0    | 50   | 25   | 25   | 25   | 0    | 0    | 0    |      |
| M00632                          | Galactose degradation, Leloir pathway, galactose => alpha-D-glucose-1P                   | 25                          | 25   | 25   | 25   | 25   | 25   | 25   | 50   | 25   | 25   | 25   | 50   | 25   | 25   | 25   | 25   | 25   | 25   | 25   | 25   | 50   | 25   | 75   | 75   | 50   |      |



| ID                                 | Module name                                                                       | Module completion ratio (%) |      |      |      |      |      |      |      |      |      |      |      |      |      |      |      |      |      |      |      |      |      |      |      |      |     |
|------------------------------------|-----------------------------------------------------------------------------------|-----------------------------|------|------|------|------|------|------|------|------|------|------|------|------|------|------|------|------|------|------|------|------|------|------|------|------|-----|
|                                    |                                                                                   | afu                         | fpl  | hsl  | hma  | hwa  | nph  | hla  | hut  | hmu  | htu  | nmg  | hvo  | hje  | hbo  | hxa  | npe  | nge  | hru  | nou  | sali | tac  | pto  | fac  | pfu  | tko  | abi |
| M00366                             | C10-C20 isoprenoid biosynthesis, plants                                           | 25                          | 25   | 25   | 25   | 25   | 25   | 25   | 25   | 25   | 25   | 25   | 25   | 25   | 25   | 25   | 25   | 25   | 25   | 25   | 25   | 25   | 25   | 25   | 25   | 25   |     |
| M00367                             | C10-C20 isoprenoid biosynthesis, non-plant eukaryotes                             | 33.3                        | 33.3 | 33.3 | 33.3 | 33.3 | 33.3 | 33.3 | 33.3 | 33.3 | 33.3 | 33.3 | 33.3 | 33.3 | 33.3 | 33.3 | 33.3 | 33.3 | 33.3 | 33.3 | 33.3 | 33.3 | 33.3 | 33.3 | 33.3 | 33.3 |     |
| M00097                             | beta-Carotene biosynthesis, GGAP => beta-carotene                                 | 0                           | 0    | 16.7 | 16.7 | 16.7 | 16.7 | 16.7 | 16.7 | 16.7 | 16.7 | 16.7 | 16.7 | 16.7 | 16.7 | 16.7 | 16.7 | 16.7 | 16.7 | 16.7 | 0    | 16.7 | 0    | 0    | 0    | 0    |     |
| M00372                             | Abscisic acid biosynthesis, beta-carotene => abscisic acid                        | 0                           | 0    | 0    | 0    | 0    | 0    | 0    | 0    | 0    | 0    | 0    | 0    | 0    | 0    | 0    | 0    | 0    | 0    | 0    | 0    | 0    | 16.7 | 0    | 0    | 0    |     |
| Nucleotide & amino acid metabolism |                                                                                   |                             |      |      |      |      |      |      |      |      |      |      |      |      |      |      |      |      |      |      |      |      |      |      |      |      |     |
| M00048                             | Inosine monophosphate biosynthesis, PRPP + glutamine => IMP                       | 80                          | 72.7 | 90   | 90   | 100  | 90   | 90   | 90   | 90   | 90   | 90   | 90   | 90   | 90   | 90   | 90   | 90   | 90   | 90   | 100  | 100  | 100  | 90.9 | 100  | 90   |     |
| M00049                             | Adenine ribonucleotide biosynthesis, IMP => ADP, ATP                              | 100                         | 100  | 100  | 100  | 100  | 100  | 100  | 100  | 100  | 100  | 100  | 100  | 100  | 100  | 100  | 100  | 100  | 100  | 100  | 100  | 100  | 100  | 100  | 100  | 100  |     |
| M00050                             | Guanine ribonucleotide biosynthesis IMP => GDP, GTP                               | 75                          | 75   | 75   | 75   | 75   | 75   | 75   | 75   | 75   | 75   | 75   | 75   | 75   | 75   | 75   | 75   | 75   | 75   | 75   | 75   | 75   | 75   | 75   | 75   | 75   |     |
| M00546                             | Purine degradation, xanthine => urea                                              | 0                           | 0    | 0    | 0    | 0    | 0    | 0    | 0    | 0    | 0    | 50   | 50   | 0    | 20   | 0    | 20   | 0    | 66.7 | 0    | 0    | 0    | 0    | 0    | 0    | 0    |     |
| M00051                             | Uridine monophosphate biosynthesis, glutamine (+ PRPP) => UMP                     | 100                         | 100  | 100  | 100  | 100  | 100  | 100  | 100  | 100  | 100  | 100  | 100  | 100  | 100  | 83.3 | 83.3 | 83.3 | 83.3 | 83.3 | 100  | 100  | 100  | 100  | 83.3 | 83.3 |     |
| M00052                             | Pyrimidine ribonucleotide biosynthesis, UMP => UDP/UTP, CDP/CTP                   | 100                         | 100  | 100  | 100  | 100  | 100  | 100  | 100  | 100  | 100  | 100  | 100  | 100  | 100  | 100  | 100  | 100  | 100  | 100  | 100  | 100  | 100  | 100  | 100  | 100  |     |
| M00053                             | Pyrimidine deoxyribonucleotide biosynthesis, CDP/CTP => dCDP/dCTP, dTDP/dTTP      | 62.5                        | 62.5 | 75   | 62.5 | 62.5 | 75   | 87.5 | 87.5 | 87.5 | 87.5 | 75   | 75   | 87.5 | 75   | 87.5 | 87.5 | 87.5 | 62.5 | 87.5 | 50   | 50   | 50   | 62.5 | 62.5 | 62.5 |     |
| M00046                             | Pyrimidine degradation, uracil => beta-alanine, thymine => 3-aminoisobutanoate    | 0                           | 0    | 0    | 0    | 0    | 0    | 33.3 | 0    | 0    | 33.3 | 33.3 | 33.3 | 0    | 0    | 0    | 0    | 0    | 33.3 | 0    | 0    | 0    | 33.3 | 0    | 0    | 0    |     |
| M00020                             | Serine biosynthesis, glycerate-3P => serine                                       | 66.7                        | 66.7 | 66.7 | 66.7 | 66.7 | 66.7 | 66.7 | 66.7 | 66.7 | 66.7 | 66.7 | 66.7 | 66.7 | 66.7 | 66.7 | 66.7 | 66.7 | 66.7 | 66.7 | 33.3 | 66.7 | 66.7 | 66.7 | 66.7 | 33.3 |     |
| M00018                             | Threonine biosynthesis, aspartate => homoserine => threonine                      | 80                          | 80   | 100  | 100  | 100  | 100  | 100  | 100  | 100  | 100  | 100  | 100  | 100  | 100  | 100  | 100  | 100  | 100  | 100  | 100  | 100  | 100  | 100  | 100  | 20   |     |
| M00555                             | Betaine biosynthesis, choline => betaine                                          | 0                           | 0    | 0    | 0    | 0    | 0    | 0    | 0    | 0    | 0    | 0    | 0    | 0    | 0    | 0    | 0    | 0    | 50   | 0    | 0    | 0    | 0    | 0    | 0    | 0    |     |
| M00021                             | Cysteine biosynthesis, serine => cysteine                                         | 0                           | 0    | 100  | 100  | 100  | 100  | 50   | 100  | 100  | 100  | 100  | 100  | 100  | 100  | 100  | 100  | 50   | 100  | 50   | 50   | 50   | 50   | 50   | 50   | 50   |     |
| M00338                             | Cysteine biosynthesis, homocysteine + serine => cysteine                          | 0                           | 0    | 50   | 0    | 0    | 0    | 0    | 0    | 0    | 50   | 50   | 50   | 0    | 100  | 0    | 50   | 50   | 0    | 0    | 50   | 0    | 0    | 0    | 0    | 0    |     |
| M00609                             | Cysteine biosynthesis, methionine => cysteine                                     | 16.7                        | 16.7 | 16.7 | 16.7 | 16.7 | 16.7 | 16.7 | 16.7 | 16.7 | 16.7 | 16.7 | 16.7 | 16.7 | 16.7 | 16.7 | 16.7 | 16.7 | 16.7 | 16.7 | 16.7 | 16.7 | 16.7 | 16.7 | 16.7 | 16.7 |     |
| M00017                             | Methionine biosynthesis, aspartate => homoserine => methionine                    | 57.1                        | 57.1 | 57.1 | 71.4 | 57.1 | 57.1 | 57.1 | 71.4 | 57.1 | 57.1 | 57.1 | 57.1 | 57.1 | 57.1 | 57.1 | 57.1 | 57.1 | 57.1 | 57.1 | 57.1 | 71.4 | 71.4 | 71.4 | 71.4 | 0    |     |
| M00034                             | Methionine salvage pathway                                                        | 62.5                        | 62.5 | 12.5 | 25   | 37.5 | 12.5 | 25   | 12.5 | 25   | 12.5 | 25   | 37.5 | 25   | 25   | 25   | 12.5 | 12.5 | 12.5 | 25   | 12.5 | 50   | 50   | 62.5 | 50   | 62.5 |     |
| M00035                             | Methionine degradation                                                            | 50                          | 75   | 50   | 50   | 50   | 50   | 50   | 50   | 75   | 75   | 75   | 75   | 50   | 100  | 75   | 75   | 75   | 50   | 50   | 50   | 50   | 75   | 75   | 50   | 50   |     |
| M00368                             | Ethylene biosynthesis, methionine => ethylene                                     | 33.3                        | 33.3 | 33.3 | 33.3 | 33.3 | 33.3 | 33.3 | 33.3 | 33.3 | 33.3 | 33.3 | 33.3 | 33.3 | 33.3 | 33.3 | 33.3 | 33.3 | 33.3 | 33.3 | 33.3 | 33.3 | 33.3 | 33.3 | 33.3 | 33.3 |     |
| M00019                             | Valine/isoleucine biosynthesis, pyruvate => valine / 2-oxobutanoate => isoleucine | 100                         | 100  | 25   | 100  | 100  | 100  | 100  | 100  | 100  | 100  | 100  | 100  | 100  | 100  | 100  | 100  | 100  | 100  | 100  | 0    | 50   | 50   | 50   | 0    | 0    |     |
| M00535                             | Isoleucine biosynthesis, pyruvate => 2-oxobutanoate                               | 100                         | 100  | 0    | 100  | 100  | 100  | 100  | 100  | 100  | 100  | 100  | 100  | 100  | 100  | 100  | 100  | 100  | 66.7 | 100  | 100  | 0    | 66.7 | 66.7 | 33.3 | 66.7 |     |
| M00570                             | Isoleucine biosynthesis, threonine => 2-oxobutanoate => isoleucine                | 80                          | 80   | 40   | 100  | 100  | 100  | 100  | 100  | 100  | 100  | 100  | 100  | 100  | 100  | 100  | 100  | 100  | 100  | 100  | 20   | 60   | 60   | 40   | 0    | 0    |     |
| M00432                             | Leucine biosynthesis, 2-oxoisovalerate => 2-oxoisocaproate                        | 100                         | 100  | 0    | 100  | 66.7 | 100  | 100  | 100  | 100  | 100  | 100  | 100  | 100  | 100  | 100  | 100  | 100  | 66.7 | 100  | 100  | 0    | 100  | 100  | 66.7 | 66.7 |     |
| M00036                             | Leucine degradation, leucine => acetoacetate + acetyl-CoA                         | 33.3                        | 33.3 | 16.7 | 33.3 | 16.7 | 33.3 | 50   | 16.7 | 16.7 | 33.3 | 33.3 | 33.3 | 33.3 | 16.7 | 33.3 | 33.3 | 16.7 | 33.3 | 33.3 | 16.7 | 16.7 | 16.7 | 0    | 0    | 0    |     |

| ID     | Module name                                                                                            | Module completion ratio (%) |      |      |      |      |      |      |      |      |      |      |      |      |      |      |      |      |      |      |      |      |      |      |      |      |     |
|--------|--------------------------------------------------------------------------------------------------------|-----------------------------|------|------|------|------|------|------|------|------|------|------|------|------|------|------|------|------|------|------|------|------|------|------|------|------|-----|
|        |                                                                                                        | afu                         | fpl  | hsl  | hma  | hwa  | nph  | hla  | hut  | hmu  | htu  | nmg  | hvo  | hje  | hbo  | hxa  | npe  | nge  | hru  | nou  | sali | tac  | pto  | fac  | pfu  | tko  | abi |
| M00016 | Lysine biosynthesis, succinyl-DAP pathway, aspartate => lysine                                         | 88.9                        | 88.9 | 22.2 | 77.8 | 88.9 | 66.7 | 88.9 | 66.7 | 66.7 | 77.8 | 88.9 | 77.8 | 77.8 | 77.8 | 77.8 | 77.8 | 33.3 | 66.7 | 66.7 | 44.4 | 44.4 | 55.6 | 44.4 | 44.4 | 11.1 |     |
| M00525 | Lysine biosynthesis, acetyl-DAP pathway, aspartate => lysine                                           | 66.7                        | 66.7 | 22.2 | 55.6 | 66.7 | 55.6 | 66.7 | 55.6 | 66.7 | 55.6 | 66.7 | 66.7 | 66.7 | 55.6 | 66.7 | 55.6 | 33.3 | 55.6 | 55.6 | 33.3 | 33.3 | 44.4 | 33.3 | 33.3 | 0    |     |
| M00526 | Lysine biosynthesis, DAP dehydrogenase pathway, aspartate => lysine                                    | 83.3                        | 83.3 | 33.3 | 83.3 | 83.3 | 83.3 | 83.3 | 83.3 | 83.3 | 83.3 | 83.3 | 83.3 | 83.3 | 83.3 | 83.3 | 83.3 | 50   | 83.3 | 83.3 | 50   | 50   | 66.7 | 50   | 50   | 0    |     |
| M00527 | Lysine biosynthesis, DAP aminotransferase pathway, aspartate => lysine                                 | 100                         | 100  | 28.6 | 71.4 | 85.7 | 71.4 | 85.7 | 71.4 | 85.7 | 71.4 | 85.7 | 85.7 | 85.7 | 71.4 | 85.7 | 71.4 | 42.9 | 71.4 | 71.4 | 42.9 | 42.9 | 57.1 | 42.9 | 42.9 | 0    |     |
| M00030 | Lysine biosynthesis, AAA pathway, 2-oxoglutarate => 2-aminoadipate => lysine                           | 0                           | 0    | 0    | 0    | 0    | 0    | 0    | 0    | 0    | 0    | 0    | 0    | 0    | 0    | 0    | 0    | 0    | 0    | 0    | 0    | 0    | 0    | 0    | 0    | 0    |     |
| M00433 | Lysine biosynthesis, 2-oxoglutarate => 2-oxoadipate                                                    | 0                           | 0    | 0    | 0    | 0    | 0    | 0    | 0    | 0    | 0    | 0    | 0    | 0    | 0    | 0    | 0    | 0    | 0    | 0    | 0    | 0    | 0    | 0    | 0    | 0    |     |
| M00031 | Lysine biosynthesis, 2-aminoadipate => lysine                                                          | 0                           | 0    | 0    | 100  | 100  | 100  | 100  | 100  | 100  | 100  | 100  | 100  | 100  | 100  | 100  | 100  | 100  | 100  | 100  | 100  | 0    | 100  | 100  | 100  | 0    |     |
| M00032 | Lysine degradation, lysine => saccharopine => acetoacetyl-CoA                                          | 14.3                        | 0    | 14.3 | 14.3 | 0    | 14.3 | 14.3 | 0    | 14.3 | 14.3 | 14.3 | 14.3 | 14.3 | 14.3 | 14.3 | 14.3 | 14.3 | 14.3 | 14.3 | 0    | 0    | 12.5 | 0    | 0    | 0    |     |
| M00608 | 2-oxocarboxylic acid chain extension, 2-oxoglutarate => 2-oxoadipate => 2-oxopimelate => 2-oxosuberate | 0                           | 0    | 0    | 0    | 0    | 0    | 0    | 0    | 0    | 0    | 0    | 0    | 0    | 0    | 0    | 0    | 0    | 0    | 0    | 0    | 0    | 0    | 0    | 0    | 0    |     |
| M00015 | Proline biosynthesis, glutamate => proline                                                             | 0                           | 50   | 0    | 0    | 100  | 100  | 0    | 100  | 100  | 100  | 0    | 100  | 0    | 0    | 0    | 100  | 100  | 0    | 0    | 100  | 50   | 50   | 50   | 50   | 0    |     |
| M00028 | Ornithine biosynthesis, glutamate => ornithine                                                         | 100                         | 100  | 0    | 80   | 80   | 80   | 80   | 80   | 80   | 100  | 80   | 80   | 80   | 80   | 100  | 80   | 80   | 80   | 80   | 100  | 0    | 60   | 60   | 80   | 80   | 0   |
| M00029 | Urea cycle                                                                                             | 60                          | 60   | 60   | 80   | 60   | 60   | 80   | 60   | 80   | 80   | 80   | 80   | 80   | 80   | 80   | 80   | 60   | 80   | 80   | 80   | 60   | 80   | 60   | 60   | 20   | 20  |
| M00026 | Histidine biosynthesis, PRPP => histidine                                                              | 77.8                        | 88.9 | 88.9 | 88.9 | 88.9 | 88.9 | 100  | 100  | 100  | 100  | 100  | 88.9 | 88.9 | 88.9 | 100  | 100  | 100  | 88.9 | 100  | 88.9 | 14.3 | 87.5 | 87.5 | 87.5 | 87.5 | 0   |
| M00045 | Histidine degradation, histidine => N-formiminoglutamate => glutamate                                  | 0                           | 0    | 100  | 100  | 0    | 0    | 0    | 0    | 0    | 100  | 75   | 100  | 0    | 75   | 0    | 0    | 75   | 75   | 75   | 0    | 75   | 100  | 50   | 0    | 0    | 75  |
| M00022 | Shikimate pathway, phosphoenolpyruvate + erythrose-4P => chorismate                                    | 71.4                        | 71.4 | 71.4 | 71.4 | 71.4 | 71.4 | 71.4 | 71.4 | 71.4 | 71.4 | 71.4 | 71.4 | 71.4 | 71.4 | 71.4 | 71.4 | 71.4 | 71.4 | 71.4 | 100  | 100  | 100  | 100  | 100  | 0    |     |
| M00023 | Tryptophan biosynthesis, chorismate => tryptophan                                                      | 75                          | 100  | 100  | 100  | 100  | 100  | 100  | 100  | 100  | 100  | 100  | 100  | 100  | 100  | 100  | 100  | 100  | 100  | 100  | 100  | 100  | 100  | 100  | 100  | 0    |     |
| M00024 | Phenylalanine biosynthesis, chorismate => phenylalanine                                                | 50                          | 50   | 66.7 | 66.7 | 66.7 | 66.7 | 66.7 | 66.7 | 66.7 | 66.7 | 66.7 | 66.7 | 66.7 | 66.7 | 66.7 | 66.7 | 66.7 | 66.7 | 66.7 | 33.3 | 33.3 | 33.3 | 66.7 | 66.7 | 33.3 | 0   |
| M00025 | Tyrosine biosynthesis, chorismate => tyrosine                                                          | 33.3                        | 33.3 | 66.7 | 66.7 | 66.7 | 66.7 | 66.7 | 66.7 | 66.7 | 66.7 | 66.7 | 66.7 | 66.7 | 66.7 | 66.7 | 66.7 | 66.7 | 66.7 | 66.7 | 33.3 | 33.3 | 33.3 | 50   | 66.7 | 66.7 | 0   |
| M00042 | Catecholamine biosynthesis, tyrosine => dopamine => noradrenaline => adrenaline                        | 25                          | 25   | 25   | 25   | 0    | 25   | 25   | 25   | 25   | 25   | 25   | 25   | 25   | 25   | 25   | 25   | 25   | 25   | 25   | 0    | 0    | 0    | 25   | 25   | 25   |     |
| M00044 | Tyrosine degradation, tyrosine => homogentisate                                                        | 0                           | 0    | 0    | 0    | 0    | 0    | 0    | 0    | 0    | 0    | 0    | 0    | 0    | 0    | 0    | 0    | 0    | 0    | 0    | 0    | 0    | 40   | 40   | 0    | 0    | 0   |
| M00038 | Tryptophan metabolism, tryptophan => kynurenine => 2-aminomuconate                                     | 0                           | 0    | 14.3 | 0    | 0    | 0    | 0    | 0    | 0    | 0    | 0    | 14.3 | 0    | 14.3 | 0    | 0    | 0    | 28.6 | 0    | 0    | 0    | 0    | 0    | 0    | 0    | 0   |
| M00027 | GABA (gamma-Aminobutyrate) shunt                                                                       | 0                           | 0    | 66.7 | 66.7 | 33.3 | 33.3 | 66.7 | 0    | 66.7 | 66.7 | 66.7 | 66.7 | 66.7 | 66.7 | 66.7 | 66.7 | 66.7 | 66.7 | 66.7 | 33.3 | 33.3 | 100  | 33.3 | 33.3 | 33.3 |     |
| M00127 | Thiamine biosynthesis, AIR => thiamine-P/thiamine-2P                                                   | 100                         | 80   | 60   | 80   | 80   | 100  | 40   | 80   | 80   | 100  | 100  | 100  | 40   | 100  | 100  | 100  | 100  | 100  | 80   | 100  | 60   | 60   | 60   | 100  | 60   | 80  |
| M00125 | Riboflavin biosynthesis, GTP => riboflavin/FMN/FAD                                                     | 66.7                        | 66.7 | 50   | 50   | 50   | 50   | 50   | 66.7 | 50   | 50   | 50   | 50   | 50   | 50   | 50   | 50   | 50   | 50   | 50   | 50   | 16.7 | 66.7 | 66.7 | 83.3 | 83.3 | 50  |
| M00124 | Pyridoxal biosynthesis, erythrose-4P => pyridoxal-5P                                                   | 0                           | 0    | 0    | 0    | 0    | 0    | 0    | 0    | 0    | 0    | 16.7 | 16.7 | 0    | 0    | 0    | 0    | 0    | 16.7 | 16.7 | 0    | 0    | 16.7 | 0    | 0    | 0    | 0   |
| M00115 | NAD biosynthesis, aspartate => NAD                                                                     | 60                          | 60   | 80   | 80   | 60   | 80   | 20   | 80   | 80   | 80   | 80   | 80   | 20   | 80   | 80   | 80   | 80   | 80   | 80   | 80   | 20   | 20   | 20   | 80   | 80   | 60  |
| M00622 | Nicotinate degradation, nicotinate => fumarate                                                         | 0                           | 0    | 0    | 0    | 0    | 0    | 0    | 0    | 0    | 16.7 | 0    | 0    | 16.7 | 16.7 | 0    | 16.7 | 16.7 | 0    | 16.7 | 0    | 0    | 16.7 | 16.7 | 16.7 | 0    |     |
| M00119 | Pantothenate biosynthesis, valine/L-aspartate => pantothenate                                          | 40                          | 40   | 60   | 60   | 40   | 60   | 60   | 60   | 60   | 60   | 60   | 60   | 60   | 60   | 60   | 60   | 60   | 60   | 60   | 60   | 0    | 0    | 0    | 40   | 40   | 20  |





| ID                              | Module name                                                    | Module completion ratio (%) |      |      |      |      |      |      |      |      |      |      |      |      |      |      |      |      |      |      |      |      |      |      |      |      |      |
|---------------------------------|----------------------------------------------------------------|-----------------------------|------|------|------|------|------|------|------|------|------|------|------|------|------|------|------|------|------|------|------|------|------|------|------|------|------|
|                                 |                                                                | afu                         | fpl  | hsl  | hma  | hwa  | nph  | hla  | hut  | hmu  | htu  | nmg  | hvo  | hje  | hbo  | hxa  | npe  | nge  | hru  | nou  | sali | tac  | pto  | fac  | pfu  | tko  | abi  |
| Structural complex              |                                                                |                             |      |      |      |      |      |      |      |      |      |      |      |      |      |      |      |      |      |      |      |      |      |      |      |      |      |
| Energy metabolism               |                                                                |                             |      |      |      |      |      |      |      |      |      |      |      |      |      |      |      |      |      |      |      |      |      |      |      |      |      |
| M00163                          | Photosystem I                                                  | 0                           | 0    | 0    | 0    | 0    | 0    | 0    | 0    | 0    | 0    | 0    | 0    | 0    | 0    | 0    | 0    | 0    | 0    | 0    | 0    | 0    | 0    | 0    | 0    | 0    | 0    |
| M00144                          | NADH:quinone oxidoreductase, prokaryotes                       | 71.4                        | 78.6 | 76.9 | 84.6 | 76.9 | 76.9 | 76.9 | 92.3 | 76.9 | 84.6 | 76.9 | 84.6 | 84.6 | 84.6 | 76.9 | 76.9 | 76.9 | 84.6 | 76.9 | 78.6 | 78.6 | 71.4 | 50   | 71.4 | 57.1 |      |
| M00145                          | NAD(P)H:quinone oxidoreductase, chloroplasts and cyanobacteria | 0                           | 0    | 0    | 9.1  | 9.1  | 9.1  | 0    | 9.1  | 9.1  | 9.1  | 0    | 9.1  | 0    | 9.1  | 9.1  | 9.1  | 0    | 0    | 9.1  | 0    | 0    | 0    | 0    | 0    | 0    | 0    |
| M00149                          | Succinate dehydrogenase, prokaryotes                           | 100                         | 100  | 100  | 100  | 100  | 100  | 100  | 100  | 100  | 100  | 100  | 100  | 100  | 100  | 100  | 100  | 100  | 100  | 100  | 100  | 100  | 75   | 75   | 0    | 0    | 25   |
| M00150                          | Fumarate reductase, prokaryotes                                | 25                          | 0    | 0    | 0    | 0    | 0    | 25   | 0    | 0    | 0    | 0    | 25   | 0    | 0    | 0    | 0    | 0    | 0    | 0    | 0    | 0    | 0    | 0    | 0    | 0    | 0    |
| M00162                          | Cytochrome b6f complex                                         | 0                           | 0    | 0    | 0    | 0    | 0    | 0    | 0    | 0    | 0    | 0    | 0    | 0    | 0    | 0    | 0    | 0    | 0    | 0    | 0    | 0    | 0    | 0    | 0    | 0    | 0    |
| M00151                          | Cytochrome bc1 complex respiratory unit                        | 0                           | 0    | 0    | 0    | 0    | 0    | 0    | 0    | 0    | 0    | 0    | 0    | 0    | 0    | 0    | 0    | 0    | 0    | 0    | 0    | 0    | 0    | 0    | 0    | 0    | 0    |
| M00152                          | Cytochrome bc1 complex                                         | 0                           | 0    | 0    | 0    | 0    | 0    | 0    | 0    | 0    | 0    | 0    | 0    | 0    | 0    | 0    | 0    | 0    | 0    | 0    | 0    | 0    | 0    | 0    | 0    | 0    | 0    |
| M00154                          | Cytochrome c oxidase                                           | 0                           | 0    | 6.7  | 0    | 0    | 0    | 6.7  | 6.7  | 6.7  | 6.7  | 6.7  | 6.7  | 6.7  | 6.7  | 6.7  | 6.7  | 6.7  | 6.7  | 6.7  | 6.7  | 6.7  | 0    | 0    | 0    | 0    | 0    |
| M00155                          | Cytochrome c oxidase, prokaryotes                              | 50                          | 50   | 100  | 100  | 100  | 100  | 100  | 100  | 100  | 100  | 100  | 100  | 100  | 100  | 100  | 100  | 100  | 100  | 100  | 100  | 0    | 100  | 100  | 0    | 0    | 0    |
| M00153                          | Cytochrome d ubiquinol oxidase                                 | 50                          | 0    | 100  | 0    | 0    | 0    | 0    | 100  | 100  | 100  | 100  | 100  | 100  | 100  | 0    | 100  | 100  | 0    | 0    | 100  | 100  | 50   | 100  | 0    | 0    | 0    |
| M00416                          | Cytochrome aa3-600 menaquinol oxidase                          | 0                           | 0    | 0    | 0    | 0    | 0    | 0    | 0    | 0    | 0    | 0    | 0    | 0    | 0    | 0    | 0    | 0    | 0    | 0    | 0    | 0    | 0    | 0    | 0    | 0    | 0    |
| M00157                          | F-type ATPase, prokaryotes and chloroplasts                    | 0                           | 0    | 0    | 0    | 0    | 0    | 0    | 0    | 0    | 0    | 0    | 0    | 0    | 0    | 0    | 0    | 0    | 0    | 0    | 0    | 0    | 0    | 0    | 0    | 0    | 0    |
| M00159                          | V-type ATPase, prokaryotes                                     | 100                         | 100  | 100  | 100  | 100  | 100  | 100  | 100  | 100  | 100  | 100  | 100  | 100  | 100  | 100  | 100  | 100  | 100  | 100  | 100  | 100  | 100  | 100  | 100  | 100  | 87.5 |
| Carbohydrate & lipid metabolism |                                                                |                             |      |      |      |      |      |      |      |      |      |      |      |      |      |      |      |      |      |      |      |      |      |      |      |      |      |
| M00310                          | Pyruvate:ferredoxin oxidoreductase                             | 100                         | 100  | 0    | 0    | 0    | 0    | 0    | 100  | 0    | 0    | 0    | 0    | 0    | 0    | 0    | 0    | 0    | 0    | 0    | 0    | 75   | 0    | 0    | 75   | 75   | 100  |
| M00311                          | 2-oxoglutarate:ferredoxin oxidoreductase                       | 100                         | 75   | 50   | 50   | 50   | 50   | 50   | 50   | 50   | 50   | 50   | 50   | 50   | 50   | 50   | 50   | 50   | 50   | 50   | 50   | 50   | 50   | 50   | 100  | 100  | 100  |
| M00312                          | 2-oxoisovalerate:ferredoxin oxidoreductase                     | 0                           | 0    | 0    | 0    | 0    | 0    | 0    | 0    | 0    | 0    | 0    | 0    | 0    | 0    | 0    | 0    | 0    | 0    | 0    | 25   | 0    | 0    | 100  | 100  | 50   |      |
| M00313                          | indolepyruvate:ferredoxin oxidoreductase                       | 100                         | 100  | 0    | 0    | 0    | 0    | 0    | 0    | 0    | 0    | 0    | 0    | 0    | 0    | 0    | 0    | 0    | 0    | 0    | 0    | 100  | 0    | 100  | 100  | 100  | 100  |
| M00072                          | Oligosaccharyltransferase                                      | 16.7                        | 16.7 | 16.7 | 16.7 | 16.7 | 16.7 | 16.7 | 16.7 | 16.7 | 16.7 | 16.7 | 16.7 | 16.7 | 16.7 | 16.7 | 16.7 | 16.7 | 16.7 | 16.7 | 16.7 | 16.7 | 16.7 | 16.7 | 16.7 | 16.7 | 16.7 |
| Genetic information processing  |                                                                |                             |      |      |      |      |      |      |      |      |      |      |      |      |      |      |      |      |      |      |      |      |      |      |      |      |      |
| M00260                          | DNA polymerase III complex, bacteria                           | 16.7                        | 16.7 | 0    | 0    | 0    | 0    | 0    | 0    | 0    | 0    | 0    | 0    | 0    | 0    | 0    | 0    | 0    | 0    | 0    | 0    | 16.7 | 0    | 0    | 0    | 0    | 0    |
| M00264                          | DNA polymerase II complex, archaea                             | 100                         | 100  | 100  | 100  | 100  | 100  | 100  | 100  | 100  | 100  | 100  | 100  | 100  | 100  | 100  | 100  | 100  | 100  | 100  | 100  | 100  | 100  | 100  | 100  | 100  | 100  |
| M00261                          | DNA polymerase alpha / primase complex                         | 25                          | 25   | 25   | 25   | 25   | 25   | 25   | 25   | 25   | 25   | 25   | 25   | 25   | 25   | 25   | 25   | 25   | 25   | 25   | 25   | 25   | 25   | 25   | 25   | 25   | 25   |
| M00288                          | RPA complex                                                    | 33.3                        | 33.3 | 33.3 | 33.3 | 33.3 | 33.3 | 33.3 | 33.3 | 33.3 | 33.3 | 33.3 | 33.3 | 33.3 | 33.3 | 33.3 | 33.3 | 33.3 | 33.3 | 33.3 | 33.3 | 33.3 | 33.3 | 33.3 | 33.3 | 33.3 | 33.3 |
| M00290                          | Holo-TFIIF complex                                             | 0                           | 10   | 20   | 10   | 10   | 10   | 20   | 10   | 20   | 20   | 20   | 20   | 20   | 20   | 20   | 20   | 20   | 20   | 20   | 20   | 10   | 10   | 10   | 10   | 10   | 10   |





| ID     | Module name                                  | Module completion ratio (%) |      |      |      |      |      |      |      |      |      |      |      |      |      |      |      |      |      |      |      |     |     |     |      |      |     |
|--------|----------------------------------------------|-----------------------------|------|------|------|------|------|------|------|------|------|------|------|------|------|------|------|------|------|------|------|-----|-----|-----|------|------|-----|
|        |                                              | afu                         | fpl  | hsl  | hma  | hwa  | nph  | hla  | hut  | hmu  | htu  | nmg  | hvo  | hje  | hbo  | hxa  | npe  | nge  | hru  | nou  | sali | tac | pto | fac | pfu  | tko  | abi |
| M00243 | Manganese/iron transport system              | 0                           | 0    | 0    | 0    | 0    | 0    | 0    | 0    | 0    | 0    | 0    | 0    | 0    | 0    | 0    | 0    | 0    | 0    | 0    | 0    | 0   | 0   | 0   | 0    | 0    | 0   |
| M00245 | Cobalt/nickel transport system               | 100                         | 100  | 100  | 75   | 100  | 0    | 0    | 75   | 100  | 0    | 0    | 100  | 0    | 100  | 0    | 0    | 0    | 0    | 0    | 0    | 0   | 0   | 0   | 100  | 100  | 100 |
| M00246 | Nickel transport system                      | 100                         | 100  | 100  | 66.7 | 100  | 0    | 0    | 100  | 100  | 0    | 0    | 100  | 0    | 100  | 0    | 0    | 0    | 0    | 0    | 0    | 0   | 0   | 0   | 100  | 100  | 100 |
| M00581 | Biotin transport system                      | 33.3                        | 33.3 | 100  | 100  | 100  | 100  | 100  | 0    | 100  | 100  | 100  | 100  | 100  | 100  | 100  | 100  | 100  | 100  | 100  | 33.3 | 0   | 0   | 0   | 33.3 | 33.3 | 0   |
| M00582 | Energy-coupling factor transport system      | 100                         | 100  | 25   | 25   | 25   | 25   | 25   | 0    | 25   | 25   | 25   | 100  | 25   | 25   | 100  | 25   | 25   | 25   | 25   | 25   | 0   | 0   | 0   | 100  | 100  | 100 |
| M00244 | Putative zinc/manganese transport system     | 100                         | 0    | 0    | 0    | 0    | 0    | 0    | 0    | 0    | 0    | 0    | 0    | 0    | 0    | 0    | 0    | 0    | 0    | 0    | 0    | 0   | 0   | 0   | 100  | 100  | 100 |
| M00298 | Multidrug/hemolysin transport system         | 0                           | 0    | 0    | 0    | 0    | 0    | 0    | 0    | 0    | 0    | 0    | 0    | 0    | 0    | 0    | 0    | 0    | 0    | 0    | 0    | 0   | 0   | 0   | 0    | 0    | 0   |
| M00250 | Lipopolysaccharide transport system          | 100                         | 0    | 0    | 0    | 0    | 0    | 0    | 0    | 0    | 0    | 0    | 0    | 0    | 0    | 0    | 0    | 0    | 0    | 0    | 0    | 0   | 0   | 0   | 0    | 0    | 0   |
| M00320 | Lipopolysaccharide export system             | 0                           | 33.3 | 0    | 0    | 0    | 0    | 0    | 0    | 0    | 0    | 0    | 0    | 0    | 0    | 0    | 0    | 0    | 0    | 0    | 0    | 0   | 0   | 0   | 0    | 0    | 0   |
| M00252 | Lipooligosaccharide transport system         | 0                           | 0    | 0    | 0    | 0    | 0    | 0    | 0    | 0    | 0    | 0    | 0    | 0    | 0    | 0    | 0    | 0    | 0    | 0    | 0    | 0   | 0   | 0   | 0    | 0    | 0   |
| M00224 | Fluoroquinolones transport system            | 0                           | 0    | 0    | 0    | 0    | 0    | 0    | 0    | 0    | 0    | 0    | 0    | 0    | 0    | 0    | 0    | 0    | 0    | 0    | 0    | 0   | 0   | 0   | 100  | 100  | 0   |
| M00255 | Lipoprotein-releasing system                 | 0                           | 0    | 0    | 0    | 0    | 0    | 0    | 0    | 0    | 0    | 0    | 0    | 0    | 0    | 0    | 0    | 0    | 0    | 0    | 0    | 0   | 0   | 0   | 0    | 0    | 0   |
| M00259 | Heme transport system                        | 100                         | 100  | 0    | 100  | 0    | 100  | 0    | 0    | 0    | 0    | 0    | 0    | 0    | 0    | 0    | 0    | 100  | 0    | 0    | 0    | 0   | 0   | 0   | 0    | 0    | 0   |
| M00258 | Uncharacterized ABC transport system_2       | 100                         | 100  | 100  | 100  | 100  | 100  | 100  | 50   | 100  | 100  | 100  | 100  | 50   | 100  | 100  | 100  | 100  | 100  | 100  | 100  | 0   | 0   | 0   | 0    | 50   | 100 |
| M00254 | Uncharacterized ABC transport system_3       | 100                         | 100  | 100  | 100  | 100  | 100  | 100  | 100  | 100  | 100  | 100  | 100  | 100  | 100  | 100  | 100  | 100  | 100  | 100  | 100  | 100 | 100 | 100 | 100  | 100  | 100 |
| M00273 | PTS system, fructose-specific II component   | 0                           | 0    | 0    | 100  | 0    | 0    | 0    | 0    | 0    | 100  | 0    | 100  | 100  | 0    | 0    | 0    | 0    | 0    | 0    | 0    | 0   | 0   | 0   | 0    | 0    | 0   |
| M00279 | PTS system, galactitol-specific II component | 0                           | 0    | 0    | 0    | 0    | 0    | 0    | 0    | 0    | 0    | 0    | 100  | 0    | 0    | 0    | 0    | 0    | 0    | 0    | 0    | 0   | 0   | 0   | 0    | 0    | 0   |
| M00276 | PTS system, mannose-specific II component    | 0                           | 0    | 0    | 0    | 0    | 0    | 0    | 0    | 0    | 0    | 0    | 0    | 0    | 0    | 0    | 0    | 0    | 0    | 0    | 0    | 0   | 0   | 0   | 0    | 0    | 0   |
| M00334 | Type VI secretion system                     | 0                           | 0    | 0    | 0    | 0    | 0    | 0    | 0    | 0    | 0    | 0    | 0    | 0    | 0    | 0    | 0    | 0    | 0    | 0    | 0    | 0   | 0   | 0   | 0    | 0    | 0   |
| M00335 | Sec (secretion) system                       | 25                          | 25   | 44.4 | 44.4 | 44.4 | 44.4 | 44.4 | 44.4 | 44.4 | 44.4 | 44.4 | 44.4 | 44.4 | 44.4 | 44.4 | 44.4 | 44.4 | 44.4 | 44.4 | 44.4 | 25  | 25  | 25  | 44.4 | 44.4 | 25  |

| ID                                   | Module name                                                                     | Module completion ratio (%) |      |      |      |      |      |      |      |      |      |      |      |      |      |      |      |      |      |      |      |      |      |      |      |      |     |
|--------------------------------------|---------------------------------------------------------------------------------|-----------------------------|------|------|------|------|------|------|------|------|------|------|------|------|------|------|------|------|------|------|------|------|------|------|------|------|-----|
|                                      |                                                                                 | afu                         | fpl  | hsl  | hma  | hwa  | nph  | hla  | hut  | hmu  | htu  | nmg  | hvo  | hje  | hbo  | hxa  | npe  | nge  | hru  | nou  | sali | tac  | pto  | fac  | pfu  | tko  | abi |
| Functional set                       |                                                                                 |                             |      |      |      |      |      |      |      |      |      |      |      |      |      |      |      |      |      |      |      |      |      |      |      |      |     |
| Metabolism                           |                                                                                 |                             |      |      |      |      |      |      |      |      |      |      |      |      |      |      |      |      |      |      |      |      |      |      |      |      |     |
| M00360                               | Aminoacyl-tRNA biosynthesis, prokaryotes                                        | 100                         | 100  | 100  | 100  | 100  | 100  | 100  | 100  | 100  | 100  | 100  | 100  | 100  | 100  | 100  | 100  | 100  | 100  | 100  | 100  | 100  | 100  | 100  | 100  | 100  | 100 |
| M00359                               | Aminoacyl-tRNA biosynthesis, eukaryotes                                         | 85                          | 85   | 85   | 85   | 85   | 85   | 85   | 85   | 85   | 85   | 85   | 85   | 85   | 85   | 85   | 90   | 85   | 85   | 85   | 90   | 90   | 90   | 90   | 90   | 95   |     |
| M00362                               | Nucleotide sugar biosynthesis, prokaryotes                                      | 42.9                        | 71.4 | 57.1 | 71.4 | 57.1 | 57.1 | 28.6 | 57.1 | 71.4 | 42.9 | 57.1 | 71.4 | 57.1 | 71.4 | 57.1 | 57.1 | 42.9 | 42.9 | 42.9 | 28.6 | 28.6 | 28.6 | 100  | 71.4 | 28.6 |     |
| M00361                               | Nucleotide sugar biosynthesis, eukaryotes                                       | 33.3                        | 50   | 50   | 50   | 50   | 50   | 16.7 | 33.3 | 50   | 33.3 | 33.3 | 50   | 33.3 | 50   | 33.3 | 50   | 33.3 | 33.3 | 33.3 | 33.3 | 33.3 | 33.3 | 66.7 | 33.3 | 16.7 |     |
| Environmental information processing |                                                                                 |                             |      |      |      |      |      |      |      |      |      |      |      |      |      |      |      |      |      |      |      |      |      |      |      |      |     |
| M00454                               | KdpD-KdpE (potassium transport) two-component regulatory system                 | 0                           | 0    | 0    | 0    | 0    | 0    | 0    | 0    | 0    | 0    | 0    | 0    | 0    | 0    | 0    | 0    | 0    | 0    | 0    | 0    | 0    | 0    | 0    | 0    | 0    |     |
| M00459                               | VicK-VicR (cell wall metabolism) two-component regulatory system                | 0                           | 0    | 0    | 0    | 0    | 0    | 0    | 0    | 0    | 0    | 0    | 0    | 0    | 0    | 0    | 0    | 0    | 0    | 0    | 0    | 0    | 0    | 0    | 0    | 0    |     |
| M00460                               | MprB-MprA (maintenance of persistent infection two-component regulatory system) | 0                           | 0    | 0    | 0    | 0    | 0    | 0    | 50   | 0    | 0    | 0    | 0    | 0    | 0    | 0    | 0    | 0    | 0    | 0    | 0    | 0    | 0    | 0    | 0    | 0    |     |
| M00506                               | CheA-CheYBV (chemotaxis) two-component regulatory system                        | 60                          | 60   | 60   | 60   | 0    | 60   | 60   | 60   | 60   | 60   | 60   | 60   | 20   | 60   | 60   | 60   | 60   | 60   | 0    | 60   | 0    | 0    | 0    | 60   | 20   |     |
| M00507                               | ChpA-ChpB/PilGH (chemosensory) two-component regulatory system                  | 0                           | 0    | 0    | 0    | 0    | 0    | 0    | 0    | 0    | 0    | 0    | 0    | 0    | 0    | 0    | 0    | 0    | 0    | 0    | 0    | 0    | 0    | 0    | 0    | 0    |     |
| M00511                               | PleC-PleD (cell fate control) two-component regulatory system                   | 0                           | 0    | 0    | 0    | 0    | 0    | 0    | 0    | 0    | 0    | 0    | 0    | 0    | 0    | 0    | 0    | 0    | 0    | 0    | 0    | 0    | 0    | 0    | 0    | 0    |     |
| M00520                               | ChvG-ChvI (acidity sensing) two-component regulatory system                     | 0                           | 0    | 0    | 0    | 0    | 0    | 0    | 0    | 0    | 0    | 0    | 0    | 0    | 0    | 0    | 0    | 0    | 0    | 0    | 0    | 0    | 0    | 0    | 0    | 0    |     |

Full species name of each abbreviation is described in Table S2.

**Table S3** Module completion patterns in 79 archaeal species listed in Table S2 (continued: *Crenarchaeota*).

| ID                | Module name                                                               | Module completion ratio (%) |      |      |      |      |      |      |      |      |      |      |      |      |      |      |      |      |      |      |     |
|-------------------|---------------------------------------------------------------------------|-----------------------------|------|------|------|------|------|------|------|------|------|------|------|------|------|------|------|------|------|------|-----|
|                   |                                                                           | ape                         | smr  | iho  | dmu  | tag  | iag  | thg  | hbu  | pfm  | sai  | mse  | aho  | pis  | cma  | ttn  | vdi  | tpe  | asc  | clg  | ffo |
| Pathway module    |                                                                           |                             |      |      |      |      |      |      |      |      |      |      |      |      |      |      |      |      |      |      |     |
| Energy metabolism |                                                                           |                             |      |      |      |      |      |      |      |      |      |      |      |      |      |      |      |      |      |      |     |
| M00165            | Reductive pentose phosphate cycle (Calvin cycle)                          | 45.5                        | 36.4 | 45.5 | 36.4 | 36.4 | 36.4 | 36.4 | 36.4 | 45.5 | 45.5 | 45.5 | 45.5 | 45.5 | 45.5 | 45.5 | 36.4 | 27.3 | 45.5 | 27.3 |     |
| M00166            | Reductive pentose phosphate cycle, ribulose-5P => glyceraldehyde-3P       | 50                          | 75   | 50   | 75   | 75   | 25   | 75   | 75   | 50   | 50   | 50   | 50   | 50   | 50   | 50   | 75   | 50   | 50   | 50   |     |
| M00167            | Reductive pentose phosphate cycle, glyceraldehyde-3P => ribulose-5P       | 42.9                        | 14.3 | 42.9 | 14.3 | 14.3 | 42.9 | 14.3 | 14.3 | 42.9 | 42.9 | 42.9 | 42.9 | 42.9 | 42.9 | 42.9 | 14.3 | 14.3 | 42.9 | 14.3 |     |
| M00168            | CAM (Crassulacean acid metabolism), dark                                  | 50                          | 0    | 100  | 0    | 0    | 50   | 0    | 0    | 100  | 100  | 100  | 100  | 100  | 100  | 100  | 50   | 50   | 50   | 0    |     |
| M00169            | CAM (Crassulacean acid metabolism), light                                 | 0                           | 0    | 0    | 0    | 0    | 50   | 0    | 0    | 0    | 0    | 50   | 0    | 0    | 50   | 50   | 0    | 0    | 50   | 0    |     |
| M00172            | C4-dicarboxylic acid cycle, NADP - malic enzyme type                      | 0                           | 0    | 25   | 0    | 0    | 50   | 0    | 0    | 25   | 25   | 50   | 25   | 25   | 50   | 50   | 25   | 25   | 25   | 0    |     |
| M00171            | C4-dicarboxylic acid cycle, NAD - malic enzyme type                       | 0                           | 0    | 14.3 | 0    | 0    | 28.6 | 0    | 0    | 14.3 | 14.3 | 14.3 | 14.3 | 14.3 | 28.6 | 28.6 | 14.3 | 14.3 | 14.3 | 0    |     |
| M00170            | C4-dicarboxylic acid cycle, phosphoenolpyruvate carboxykinase type        | 25                          | 0    | 25   | 0    | 0    | 25   | 0    | 0    | 25   | 25   | 25   | 25   | 25   | 25   | 25   | 25   | 25   | 0    | 0    |     |
| M00173            | Reductive citrate cycle (Arnon-Buchanan cycle)                            | 72.7                        | 36.4 | 81.8 | 36.4 | 36.4 | 45.5 | 40   | 40   | 72.7 | 90.9 | 90.9 | 90.9 | 90.9 | 90.9 | 90.9 | 45.5 | 81.8 | 81.8 | 36.4 |     |
| M00376            | 3-Hydroxypropionate bi-cycle                                              | 18.8                        | 0    | 12.5 | 0    | 0    | 0    | 0    | 12.5 | 12.5 | 52.6 | 52.6 | 52.6 | 16.7 | 16.7 | 16.7 | 27.8 | 0    | 18.8 | 18.8 |     |
| M00375            | Hydroxypropionate-hydroxybutylate cycle                                   | 25                          | 0    | 33.3 | 8.3  | 8.3  | 8.3  | 8.3  | 0    | 33.3 | 100  | 100  | 93.3 | 50   | 28.6 | 50   | 28.6 | 8.3  | 25   | 33.3 |     |
| M00374            | Dicarboxylate-hydroxybutyrate cycle                                       | 53.8                        | 23.1 | 84.6 | 30.8 | 30.8 | 23.1 | 30.8 | 30.8 | 84.6 | 100  | 100  | 92.3 | 100  | 69.2 | 100  | 69.2 | 38.5 | 61.5 | 69.2 |     |
| M00377            | Reductive acetyl-CoA pathway (Wood-Ljungdahl pathway)                     | 0                           | 0    | 0    | 0    | 0    | 0    | 0    | 0    | 0    | 0    | 0    | 0    | 14.3 | 0    | 14.3 | 0    | 0    | 0    | 0    |     |
| M00579            | Phosphate acetyltransferase-acetate kinase pathway, acetyl-CoA => acetate | 0                           | 0    | 0    | 0    | 0    | 0    | 0    | 0    | 0    | 0    | 0    | 0    | 0    | 0    | 0    | 0    | 0    | 0    | 0    |     |
| M00175            | Nitrogen fixation, nitrogen => ammonia                                    | 0                           | 0    | 0    | 0    | 0    | 0    | 0    | 0    | 0    | 0    | 0    | 0    | 0    | 0    | 0    | 0    | 0    | 0    | 0    |     |
| M00531            | Assimilatory nitrate reduction, nitrate => ammonia                        | 0                           | 0    | 0    | 0    | 0    | 0    | 0    | 0    | 0    | 0    | 100  | 0    | 0    | 50   | 0    | 50   | 0    | 0    | 0    |     |
| M00530            | Dissimilatory nitrate reduction, nitrate => ammonia                       | 0                           | 0    | 0    | 0    | 0    | 0    | 0    | 0    | 0    | 0    | 0    | 0    | 0    | 0    | 0    | 50   | 0    | 0    | 0    |     |
| M00529            | Denitrification, nitrate => nitrogen                                      | 0                           | 0    | 0    | 0    | 0    | 0    | 0    | 0    | 0    | 0    | 0    | 0    | 0    | 0    | 0    | 25   | 0    | 0    | 0    |     |
| M00528            | Nitrification, ammonia => nitrite                                         | 0                           | 0    | 0    | 0    | 0    | 0    | 0    | 0    | 0    | 0    | 0    | 0    | 0    | 0    | 0    | 0    | 0    | 0    | 0    |     |
| M00567            | Methanogenesis, CO2 => methane                                            | 0                           | 0    | 0    | 0    | 0    | 0    | 0    | 0    | 0    | 12.5 | 12.5 | 12.5 | 0    | 0    | 0    | 0    | 0    | 0    | 0    |     |
| M00357            | Methanogenesis, acetate => methane                                        | 20                          | 0    | 20   | 0    | 0    | 0    | 0    | 0    | 20   | 40   | 40   | 40   | 20   | 20   | 20   | 20   | 20   | 20   | 0    |     |
| M00356            | Methanogenesis, methanol => methane                                       | 0                           | 0    | 0    | 0    | 0    | 0    | 0    | 0    | 0    | 33.3 | 33.3 | 33.3 | 0    | 0    | 0    | 0    | 0    | 0    | 0    |     |
| M00563            | Methanogenesis, mono-/di-/tri-methylamine => methane                      | 0                           | 0    | 0    | 0    | 0    | 0    | 0    | 0    | 0    | 25   | 25   | 25   | 0    | 0    | 0    | 0    | 0    | 0    | 0    |     |
| M00358            | Coenzyme M biosynthesis                                                   | 0                           | 0    | 0    | 0    | 0    | 0    | 0    | 0    | 0    | 0    | 0    | 0    | 0    | 0    | 0    | 0    | 0    | 0    | 0    |     |
| M00174            | Methane oxidation, methanotroph, methane => formaldehyde                  | 0                           | 0    | 0    | 0    | 0    | 0    | 0    | 0    | 0    | 0    | 0    | 0    | 0    | 0    | 0    | 0    | 0    | 0    | 0    |     |
| M00346            | Formaldehyde assimilation, serine pathway                                 | 44.4                        | 33.3 | 44.4 | 22.2 | 22.2 | 44.4 | 22.2 | 33.3 | 44.4 | 55.6 | 55.6 | 55.6 | 44.4 | 55.6 | 44.4 | 55.6 | 33.3 | 44.4 | 44.4 |     |

| ID                              | Module name                                                                               | Module completion ratio (%) |      |      |      |      |      |      |      |      |      |      |      |      |      |      |      |      |      |      |      |
|---------------------------------|-------------------------------------------------------------------------------------------|-----------------------------|------|------|------|------|------|------|------|------|------|------|------|------|------|------|------|------|------|------|------|
|                                 |                                                                                           | ape                         | smr  | iho  | dmu  | tag  | iag  | thg  | hbu  | pfm  | sai  | mse  | aho  | pis  | cma  | ttn  | vdi  | tpe  | asc  | clg  | ffo  |
| M00345                          | Formaldehyde assimilation, ribulose monophosphate pathway                                 | 50                          | 50   | 50   | 50   | 50   | 50   | 50   | 50   | 50   | 50   | 50   | 50   | 75   | 75   | 75   | 50   | 50   | 50   | 50   |      |
| M00344                          | Formaldehyde assimilation, xylulose monophosphate pathway                                 | 0                           | 0    | 0    | 0    | 0    | 0    | 0    | 0    | 0    | 0    | 0    | 0    | 0    | 0    | 0    | 0    | 0    | 0    | 0    |      |
| M00378                          | F420 biosynthesis                                                                         | 0                           | 0    | 0    | 0    | 0    | 0    | 0    | 0    | 0    | 0    | 0    | 0    | 0    | 0    | 0    | 0    | 0    | 20   | 0    | 0    |
| M00422                          | Acetyl-CoA pathway, CO2 => acetyl-CoA                                                     | 0                           | 0    | 0    | 0    | 0    | 0    | 0    | 0    | 0    | 0    | 0    | 0    | 0    | 0    | 0    | 0    | 0    | 0    | 0    | 0    |
| M00176                          | Assimilatory sulfate reduction, sulfate => H2S                                            | 33.3                        | 66.7 | 66.7 | 33.3 | 33.3 | 33.3 | 33.3 | 66.7 | 66.7 | 33.3 | 33.3 | 0    | 66.7 | 0    | 33.3 | 33.3 | 33.3 | 33.3 | 33.3 | 0    |
| M00596                          | Dissimilatory sulfate reduction, sulfate => H2S                                           | 33.3                        | 33.3 | 33.3 | 0    | 0    | 0    | 0    | 33.3 | 33.3 | 33.3 | 33.3 | 0    | 66.7 | 100  | 100  | 100  | 0    | 33.3 | 33.3 | 0    |
| Carbohydrate & lipid metabolism |                                                                                           |                             |      |      |      |      |      |      |      |      |      |      |      |      |      |      |      |      |      |      |      |
| M00001                          | Glycolysis (Embden-Meyerhof pathway), glucose => pyruvate                                 | 90                          | 90   | 70   | 90   | 90   | 88.9 | 90   | 70   | 60   | 70   | 80   | 80   | 80   | 100  | 100  | 100  | 90   | 90   | 90   | 70   |
| M00002                          | Glycolysis, core module involving three-carbon compounds                                  | 100                         | 100  | 83.3 | 100  | 100  | 100  | 100  | 100  | 83.3 | 100  | 100  | 100  | 100  | 100  | 100  | 100  | 100  | 100  | 100  | 100  |
| M00003                          | Gluconeogenesis, oxaloacetate => fructose-6P                                              | 100                         | 62.5 | 62.5 | 100  | 100  | 50   | 100  | 100  | 62.5 | 100  | 100  | 62.5 | 62.5 | 100  | 62.5 | 75   | 100  | 75   | 75   | 100  |
| M00307                          | Pyruvate oxidation, pyruvate => acetyl-CoA                                                | 100                         | 100  | 100  | 100  | 100  | 100  | 100  | 100  | 100  | 100  | 100  | 100  | 100  | 100  | 100  | 100  | 100  | 100  | 100  | 100  |
| M00009                          | Citrate cycle (TCA cycle, Krebs cycle)                                                    | 87.5                        | 12.5 | 62.5 | 25   | 25   | 12.5 | 37.5 | 37.5 | 75   | 75   | 75   | 87.5 | 75   | 87.5 | 75   | 100  | 12.5 | 87.5 | 87.5 | 12.5 |
| M00010                          | Citrate cycle, first carbon oxidation, oxaloacetate => 2-oxoglutarate                     | 100                         | 0    | 33.3 | 0    | 0    | 33.3 | 33.3 | 0    | 66.7 | 100  | 100  | 100  | 100  | 100  | 100  | 100  | 0    | 100  | 100  | 0    |
| M00011                          | Citrate cycle, second carbon oxidation, 2-oxoglutarate => oxaloacetate                    | 80                          | 20   | 80   | 40   | 40   | 0    | 40   | 60   | 80   | 60   | 60   | 80   | 60   | 80   | 60   | 100  | 20   | 80   | 80   | 20   |
| M00004                          | Pentose phosphate pathway (Pentose phosphate cycle)                                       | 42.9                        | 28.6 | 42.9 | 28.6 | 28.6 | 42.9 | 28.6 | 28.6 | 42.9 | 42.9 | 42.9 | 42.9 | 42.9 | 42.9 | 42.9 | 42.9 | 28.6 | 28.6 | 42.9 | 28.6 |
| M00006                          | Pentose phosphate pathway, oxidative phase, glucose 6P => ribulose 5P                     | 0                           | 0    | 0    | 0    | 0    | 0    | 0    | 0    | 0    | 0    | 0    | 0    | 0    | 0    | 0    | 0    | 0    | 0    | 0    | 0    |
| M00007                          | Pentose phosphate pathway, non-oxidative phase, fructose 6P => ribose 5P                  | 50                          | 25   | 50   | 25   | 25   | 50   | 25   | 25   | 50   | 50   | 50   | 50   | 50   | 50   | 50   | 50   | 25   | 25   | 50   | 25   |
| M00580                          | Pentose phosphate pathway, archaea, fructose 6P => ribose 5P                              | 100                         | 100  | 100  | 100  | 100  | 100  | 100  | 100  | 100  | 100  | 100  | 100  | 100  | 100  | 100  | 100  | 100  | 100  | 100  | 100  |
| M00005                          | PRPP biosynthesis, ribose 5P => PRPP                                                      | 100                         | 100  | 100  | 100  | 100  | 100  | 100  | 100  | 100  | 100  | 100  | 100  | 100  | 100  | 100  | 100  | 100  | 100  | 100  | 100  |
| M00008                          | Entner-Doudoroff pathway, glucose-6P => glyceraldehyde-3P + pyruvate                      | 0                           | 0    | 0    | 0    | 0    | 0    | 0    | 0    | 0    | 0    | 0    | 0    | 0    | 0    | 0    | 0    | 0    | 0    | 0    | 0    |
| M00308                          | Semi-phosphorylative Entner-Doudoroff pathway, gluconate => glyceraldehyde-3P + pyruvate  | 25                          | 25   | 20   | 25   | 25   | 25   | 25   | 20   | 20   | 50   | 50   | 40   | 20   | 50   | 50   | 50   | 20   | 25   | 25   | 25   |
| M00633                          | Semi-phosphorylative Entner-Doudoroff pathway, gluconate/galactonate => glyceraldehyde-3P | 25                          | 25   | 0    | 25   | 25   | 25   | 25   | 0    | 0    | 100  | 100  | 50   | 0    | 75   | 100  | 75   | 0    | 25   | 25   | 25   |
| M00309                          | Non-phosphorylative Entner-Doudoroff pathway, gluconate => glyceraldehyde + pyruvate      | 33.3                        | 33.3 | 33.3 | 33.3 | 33.3 | 0    | 33.3 | 33.3 | 33.3 | 100  | 100  | 100  | 33.3 | 66.7 | 100  | 66.7 | 33.3 | 33.3 | 33.3 | 33.3 |
| M00012                          | Glyoxylate cycle                                                                          | 60                          | 0    | 20   | 0    | 0    | 0    | 0    | 0    | 40   | 100  | 80   | 60   | 80   | 60   | 80   | 60   | 0    | 60   | 60   | 0    |
| M00373                          | Ethylmalonyl pathway                                                                      | 7.1                         | 0    | 7.1  | 7.1  | 7.1  | 7.1  | 7.1  | 0    | 7.1  | 21.4 | 21.4 | 21.4 | 7.1  | 7.1  | 7.1  | 14.3 | 7.1  | 7.1  | 7.1  | 7.1  |
| M00532                          | Photorespiration                                                                          | 20                          | 40   | 10   | 40   | 40   | 20   | 40   | 30   | 20   | 20   | 20   | 20   | 20   | 20   | 10   | 30   | 10   | 20   | 20   | 30   |
| M00013                          | Malonate semialdehyde pathway, propanoyl-CoA => Acetyl-CoA                                | 25                          | 0    | 0    | 0    | 0    | 0    | 0    | 0    | 0    | 0    | 25   | 0    | 25   | 25   | 0    | 25   | 0    | 25   | 25   | 0    |
| M00632                          | Galactose degradation, Leloir pathway, galactose => alpha-D-glucose-1P                    | 0                           | 75   | 25   | 25   | 25   | 75   | 25   | 0    | 0    | 25   | 25   | 25   | 25   | 75   | 25   | 75   | 75   | 75   | 75   | 25   |





| ID                                 | Module name                                                                     | Module completion ratio (%) |      |      |      |      |      |      |      |      |      |      |      |      |      |      |      |      |      |      |      |
|------------------------------------|---------------------------------------------------------------------------------|-----------------------------|------|------|------|------|------|------|------|------|------|------|------|------|------|------|------|------|------|------|------|
|                                    |                                                                                 | ape                         | smr  | iho  | dmu  | tag  | iag  | thg  | hbu  | pfm  | sai  | mse  | aho  | pis  | cma  | ttn  | vdi  | tpe  | asc  | clg  | ffo  |
| M00366                             | C10-C20 isoprenoid biosynthesis, plants                                         | 25                          | 25   | 25   | 25   | 25   | 25   | 25   | 25   | 25   | 25   | 25   | 25   | 25   | 25   | 25   | 25   | 25   | 25   | 25   | 25   |
| M00367                             | C10-C20 isoprenoid biosynthesis, non-plant eukaryotes                           | 33.3                        | 33.3 | 33.3 | 33.3 | 33.3 | 33.3 | 33.3 | 33.3 | 33.3 | 33.3 | 33.3 | 33.3 | 33.3 | 33.3 | 33.3 | 33.3 | 33.3 | 33.3 | 33.3 | 33.3 |
| M00097                             | beta-Carotene biosynthesis, GGAP => beta-carotene                               | 0                           | 0    | 0    | 0    | 0    | 0    | 0    | 0    | 0    | 16.7 | 16.7 | 0    | 0    | 0    | 0    | 0    | 0    | 0    | 0    | 0    |
| M00372                             | Abscisic acid biosynthesis, beta-carotene => abscisic acid                      | 0                           | 0    | 0    | 0    | 0    | 0    | 0    | 0    | 0    | 16.7 | 16.7 | 0    | 0    | 0    | 0    | 0    | 0    | 0    | 0    | 0    |
| Nucleotide & amino acid metabolism |                                                                                 |                             |      |      |      |      |      |      |      |      |      |      |      |      |      |      |      |      |      |      |      |
| M00048                             | Inosine monophosphate biosynthesis, PRPP + glutamine => IMP                     | 0                           | 10   | 81.8 | 0    | 0    | 81.8 | 0    | 0    | 81.8 | 90.9 | 90.9 | 90.9 | 90.9 | 90.9 | 90.9 | 90.9 | 0    | 0    | 0    | 81.8 |
| M00049                             | Adenine ribonucleotide biosynthesis, IMP => ADP, ATP                            | 50                          | 50   | 100  | 50   | 50   | 100  | 50   | 50   | 100  | 100  | 100  | 100  | 100  | 100  | 100  | 100  | 50   | 50   | 50   | 100  |
| M00050                             | Guanine ribonucleotide biosynthesis IMP => GDP, GTP                             | 75                          | 25   | 50   | 50   | 50   | 75   | 25   | 25   | 50   | 50   | 50   | 50   | 75   | 50   | 50   | 50   | 75   | 75   | 75   | 50   |
| M00546                             | Purine degradation, xanthine => urea                                            | 0                           | 20   | 0    | 0    | 0    | 0    | 0    | 0    | 0    | 0    | 0    | 0    | 0    | 0    | 0    | 0    | 0    | 0    | 0    | 0    |
| M00051                             | Uridine monophosphate biosynthesis, glutamine (+ PRPP) => UMP                   | 83.3                        | 83.3 | 100  | 80   | 0    | 100  | 75   | 100  | 100  | 100  | 100  | 100  | 100  | 100  | 100  | 100  | 83.3 | 83.3 | 100  | 83.3 |
| M00052                             | Pyrimidine ribonucleotide biosynthesis, UMP => UDP/UTP, CDP/CTP                 | 100                         | 100  | 100  | 66.7 | 66.7 | 66.7 | 100  | 100  | 100  | 100  | 100  | 100  | 100  | 100  | 100  | 100  | 66.7 | 100  | 100  | 100  |
| M00053                             | Pyrimidine deoxyribonucleotide biosynthesis, CDP/CTP => dCDP/dCTP, dTDP/dTTP    | 62.5                        | 75   | 62.5 | 37.5 | 37.5 | 62.5 | 62.5 | 75   | 75   | 62.5 | 50   | 50   | 75   | 50   | 75   | 62.5 | 37.5 | 62.5 | 62.5 | 62.5 |
| M00046                             | Pyrimidine degradation, uracil => beta-alanine, thymine => 3-aminoisobutanoate  | 0                           | 0    | 0    | 33.3 | 33.3 | 0    | 33.3 | 0    | 0    | 0    | 0    | 0    | 0    | 0    | 0    | 0    | 0    | 0    | 0    | 0    |
| M00020                             | Serine biosynthesis, glycerate-3P => serine                                     | 33.3                        | 33.3 | 66.7 | 66.7 | 66.7 | 66.7 | 66.7 | 33.3 | 66.7 | 33.3 | 33.3 | 33.3 | 66.7 | 33.3 | 66.7 | 66.7 | 0    | 33.3 | 66.7 | 33.3 |
| M00018                             | Threonine biosynthesis, aspartate => homoserine => threonine                    | 100                         | 20   | 80   | 20   | 20   | 100  | 100  | 60   | 80   | 100  | 100  | 100  | 100  | 100  | 100  | 20   | 20   | 100  | 20   |      |
| M00555                             | Betaine biosynthesis, choline => betaine                                        | 0                           | 0    | 0    | 0    | 0    | 0    | 0    | 0    | 0    | 50   | 0    | 0    | 0    | 0    | 0    | 0    | 0    | 0    | 0    | 0    |
| M00021                             | Cysteine biosynthesis, serine => cysteine                                       | 0                           | 50   | 50   | 50   | 50   | 0    | 50   | 50   | 50   | 50   | 50   | 50   | 50   | 50   | 50   | 50   | 50   | 0    | 0    | 0    |
| M00338                             | Cysteine biosynthesis, homocysteine + serine => cysteine                        | 100                         | 0    | 0    | 50   | 50   | 50   | 50   | 50   | 50   | 0    | 0    | 0    | 50   | 0    | 0    | 0    | 50   | 50   | 50   | 0    |
| M00609                             | Cysteine biosynthesis, methionine => cysteine                                   | 16.7                        | 16.7 | 16.7 | 16.7 | 16.7 | 16.7 | 16.7 | 16.7 | 16.7 | 16.7 | 16.7 | 16.7 | 16.7 | 16.7 | 16.7 | 16.7 | 16.7 | 16.7 | 33.3 | 16.7 |
| M00017                             | Methionine biosynthesis, aspartate => homoserine => methionine                  | 71.4                        | 14.3 | 57.1 | 0    | 0    | 71.4 | 71.4 | 42.9 | 57.1 | 71.4 | 71.4 | 71.4 | 71.4 | 71.4 | 71.4 | 71.4 | 14.3 | 28.6 | 71.4 | 0    |
| M00034                             | Methionine salvage pathway                                                      | 50                          | 62.5 | 62.5 | 62.5 | 62.5 | 62.5 | 62.5 | 62.5 | 50   | 62.5 | 50   | 50   | 50   | 50   | 50   | 62.5 | 62.5 | 62.5 | 62.5 |      |
| M00035                             | Methionine degradation                                                          | 100                         | 75   | 75   | 100  | 100  | 100  | 100  | 100  | 100  | 75   | 75   | 75   | 100  | 75   | 75   | 75   | 100  | 100  | 100  | 75   |
| M00368                             | Ethylene biosynthesis, methionine => ethylene                                   | 33.3                        | 33.3 | 33.3 | 33.3 | 33.3 | 33.3 | 33.3 | 33.3 | 33.3 | 33.3 | 33.3 | 33.3 | 33.3 | 33.3 | 33.3 | 33.3 | 33.3 | 33.3 | 33.3 | 33.3 |
| M00019                             | Valine/isoleucine biosynthesis, pyruvate => valine/2-oxobutanoate => isoleucine | 25                          | 0    | 75   | 0    | 0    | 75   | 0    | 0    | 75   | 50   | 50   | 50   | 75   | 75   | 100  | 100  | 0    | 25   | 50   | 0    |
| M00535                             | Isoleucine biosynthesis, pyruvate => 2-oxobutanoate                             | 0                           | 0    | 66.7 | 0    | 0    | 66.7 | 33.3 | 0    | 66.7 | 66.7 | 66.7 | 66.7 | 66.7 | 66.7 | 66.7 | 66.7 | 0    | 0    | 0    | 0    |
| M00570                             | Isoleucine biosynthesis, threonine => 2-oxobutanoate => isoleucine              | 40                          | 20   | 60   | 0    | 0    | 80   | 0    | 20   | 60   | 60   | 60   | 60   | 80   | 80   | 100  | 100  | 20   | 40   | 60   | 20   |
| M00432                             | Leucine biosynthesis, 2-oxoisovalerate => 2-oxoisocaproate                      | 0                           | 0    | 100  | 0    | 0    | 100  | 33.3 | 0    | 100  | 100  | 100  | 100  | 100  | 100  | 100  | 100  | 0    | 0    | 33.3 | 0    |
| M00036                             | Leucine degradation, leucine => acetoacetate + acetyl-CoA                       | 16.7                        | 0    | 0    | 0    | 0    | 16.7 | 0    | 0    | 0    | 0    | 16.7 | 0    | 16.7 | 16.7 | 16.7 | 33.3 | 0    | 16.7 | 0    | 0    |

| ID     | Module name                                                                                            | Module completion ratio (%) |      |      |      |      |      |      |      |      |      |      |      |      |      |      |      |      |      |      |      |
|--------|--------------------------------------------------------------------------------------------------------|-----------------------------|------|------|------|------|------|------|------|------|------|------|------|------|------|------|------|------|------|------|------|
|        |                                                                                                        | ape                         | smr  | iho  | dmu  | tag  | iag  | thg  | hbu  | pfm  | sai  | mse  | aho  | pis  | cma  | ttn  | vdi  | tpe  | asc  | clg  | ffo  |
| M00016 | Lysine biosynthesis, succinyl-DAP pathway, aspartate => lysine                                         | 44.4                        | 22.2 | 33.3 | 11.1 | 11.1 | 44.4 | 33.3 | 33.3 | 33.3 | 44.4 | 44.4 | 44.4 | 44.4 | 66.7 | 44.4 | 66.7 | 22.2 | 22.2 | 55.6 | 44.4 |
| M00525 | Lysine biosynthesis, acetyl-DAP pathway, aspartate => lysine                                           | 33.3                        | 11.1 | 22.2 | 0    | 0    | 33.3 | 22.2 | 22.2 | 22.2 | 33.3 | 33.3 | 33.3 | 33.3 | 55.6 | 33.3 | 55.6 | 11.1 | 11.1 | 44.4 | 33.3 |
| M00526 | Lysine biosynthesis, DAP dehydrogenase pathway, aspartate => lysine                                    | 50                          | 16.7 | 33.3 | 0    | 0    | 50   | 33.3 | 33.3 | 33.3 | 50   | 50   | 50   | 50   | 83.3 | 50   | 83.3 | 16.7 | 16.7 | 66.7 | 50   |
| M00527 | Lysine biosynthesis, DAP aminotransferase pathway, aspartate => lysine                                 | 42.9                        | 14.3 | 28.6 | 0    | 0    | 42.9 | 28.6 | 28.6 | 28.6 | 42.9 | 42.9 | 42.9 | 42.9 | 71.4 | 42.9 | 71.4 | 14.3 | 14.3 | 57.1 | 42.9 |
| M00030 | Lysine biosynthesis, AAA pathway, 2-oxoglutarate => 2-aminoadipate => lysine                           | 0                           | 0    | 0    | 0    | 0    | 0    | 0    | 0    | 0    | 0    | 0    | 0    | 0    | 0    | 0    | 0    | 0    | 0    | 0    | 0    |
| M00433 | Lysine biosynthesis, 2-oxoglutarate => 2-oxoadipate                                                    | 0                           | 0    | 0    | 0    | 0    | 0    | 0    | 0    | 0    | 0    | 0    | 0    | 0    | 0    | 0    | 0    | 0    | 0    | 0    | 0    |
| M00031 | Lysine biosynthesis, 2-aminoadipate => lysine                                                          | 100                         | 0    | 100  | 0    | 0    | 100  | 0    | 0    | 100  | 100  | 100  | 100  | 100  | 100  | 100  | 100  | 0    | 0    | 0    | 0    |
| M00032 | Lysine degradation, lysine => saccharopine => acetoacetyl-CoA                                          | 0                           | 0    | 0    | 0    | 0    | 0    | 0    | 0    | 0    | 0    | 0    | 0    | 0    | 0    | 0    | 0    | 0    | 0    | 0    | 0    |
| M00608 | 2-oxocarboxylic acid chain extension, 2-oxoglutarate => 2-oxoadipate => 2-oxopimelate => 2-oxosuberate | 0                           | 0    | 0    | 0    | 0    | 0    | 0    | 0    | 0    | 0    | 0    | 0    | 0    | 0    | 0    | 0    | 0    | 0    | 0    | 0    |
| M00015 | Proline biosynthesis, glutamate => proline                                                             | 50                          | 0    | 50   | 50   | 0    | 50   | 50   | 50   | 50   | 0    | 50   | 50   | 50   | 50   | 50   | 50   | 50   | 50   | 50   | 0    |
| M00028 | Ornithine biosynthesis, glutamate => ornithine                                                         | 60                          | 0    | 60   | 0    | 0    | 60   | 0    | 0    | 60   | 60   | 60   | 60   | 60   | 60   | 60   | 60   | 0    | 0    | 0    | 0    |
| M00029 | Urea cycle                                                                                             | 20                          | 20   | 60   | 20   | 20   | 60   | 20   | 60   | 60   | 60   | 60   | 60   | 60   | 60   | 60   | 60   | 20   | 20   | 20   | 20   |
| M00026 | Histidine biosynthesis, PRPP => histidine                                                              | 14.3                        | 0    | 88.9 | 0    | 0    | 88.9 | 14.3 | 14.3 | 77.8 | 88.9 | 88.9 | 88.9 | 88.9 | 88.9 | 88.9 | 88.9 | 0    | 0    | 0    | 0    |
| M00045 | Histidine degradation, histidine => N-formiminoglutamate => glutamate                                  | 0                           | 0    | 0    | 0    | 0    | 0    | 0    | 0    | 0    | 0    | 0    | 0    | 0    | 75   | 0    | 75   | 0    | 75   | 75   | 0    |
| M00022 | Shikimate pathway, phosphoenolpyruvate + erythrose-4P => chorismate                                    | 100                         | 0    | 100  | 0    | 0    | 100  | 0    | 0    | 100  | 100  | 100  | 100  | 100  | 100  | 100  | 100  | 0    | 0    | 100  | 0    |
| M00023 | Tryptophan biosynthesis, chorismate => tryptophan                                                      | 100                         | 0    | 100  | 0    | 0    | 100  | 0    | 0    | 100  | 100  | 100  | 100  | 100  | 100  | 100  | 100  | 0    | 0    | 100  | 0    |
| M00024 | Phenylalanine biosynthesis, chorismate => phenylalanine                                                | 0                           | 0    | 66.7 | 0    | 0    | 50   | 0    | 0    | 66.7 | 66.7 | 33.3 | 66.7 | 33.3 | 33.3 | 33.3 | 33.3 | 0    | 0    | 0    | 0    |
| M00025 | Tyrosine biosynthesis, chorismate => tyrosine                                                          | 33.3                        | 0    | 50   | 0    | 0    | 33.3 | 0    | 0    | 50   | 50   | 50   | 50   | 33.3 | 0    | 33.3 | 0    | 0    | 0    | 33.3 | 0    |
| M00042 | Catecholamine biosynthesis, tyrosine => dopamine => noradrenaline => adrenaline                        | 0                           | 25   | 0    | 25   | 25   | 0    | 25   | 25   | 0    | 0    | 0    | 0    | 0    | 0    | 0    | 0    | 0    | 25   | 0    | 0    |
| M00044 | Tyrosine degradation, tyrosine => homogentisate                                                        | 0                           | 0    | 0    | 0    | 0    | 0    | 0    | 0    | 0    | 0    | 0    | 0    | 0    | 0    | 0    | 0    | 0    | 0    | 0    | 0    |
| M00038 | Tryptophan metabolism, tryptophan => kynurenine => 2-aminomuconate                                     | 0                           | 0    | 0    | 0    | 0    | 0    | 0    | 0    | 0    | 0    | 0    | 0    | 0    | 0    | 0    | 0    | 0    | 0    | 0    | 0    |
| M00027 | GABA (gamma-Aminobutyrate) shunt                                                                       | 66.7                        | 33.3 | 0    | 33.3 | 33.3 | 33.3 | 33.3 | 33.3 | 0    | 33.3 | 33.3 | 0    | 33.3 | 33.3 | 33.3 | 33.3 | 33.3 | 33.3 | 33.3 | 33.3 |
| M00127 | Thiamine biosynthesis, AIR => thiamine-P/thiamine-2P                                                   | 40                          | 40   | 60   | 40   | 80   | 60   | 60   | 60   | 60   | 60   | 60   | 60   | 60   | 80   | 60   | 100  | 20   | 40   | 40   | 40   |
| M00125 | Riboflavin biosynthesis, GTP => riboflavin/FMN/FAD                                                     | 50                          | 50   | 50   | 0    | 0    | 16.7 | 0    | 50   | 50   | 50   | 50   | 50   | 50   | 0    | 50   | 50   | 0    | 50   | 50   | 0    |
| M00124 | Pyridoxal biosynthesis, erythrose-4P => pyridoxal-5P                                                   | 0                           | 0    | 0    | 0    | 0    | 16.7 | 0    | 0    | 0    | 0    | 0    | 0    | 0    | 16.7 | 0    | 0    | 0    | 0    | 0    | 0    |
| M00115 | NAD biosynthesis, aspartate => NAD                                                                     | 20                          | 20   | 60   | 20   | 20   | 20   | 20   | 60   | 60   | 80   | 20   | 80   | 20   | 80   | 80   | 80   | 40   | 20   | 20   | 20   |
| M00622 | Nicotinate degradation, nicotinate => fumarate                                                         | 16.7                        | 0    | 0    | 0    | 0    | 0    | 0    | 0    | 0    | 0    | 0    | 16.7 | 0    | 16.7 | 0    | 16.7 | 0    | 16.7 | 0    | 0    |
| M00119 | Pantothenate biosynthesis, valine/L-aspartate => pantothenate                                          | 40                          | 40   | 20   | 40   | 40   | 20   | 40   | 40   | 40   | 20   | 20   | 20   | 60   | 40   | 80   | 60   | 0    | 40   | 40   | 40   |



| ID                              | Module name                                                    | Module completion ratio (%) |      |      |      |      |      |      |      |      |      |      |      |      |      |      |      |      |      |      |      |
|---------------------------------|----------------------------------------------------------------|-----------------------------|------|------|------|------|------|------|------|------|------|------|------|------|------|------|------|------|------|------|------|
|                                 |                                                                | ape                         | smr  | iho  | dmu  | tag  | iag  | thg  | hbu  | pfm  | sai  | mse  | aho  | pis  | cma  | tnn  | vdi  | tpe  | asc  | clg  | ffo  |
| Structural complex              |                                                                |                             |      |      |      |      |      |      |      |      |      |      |      |      |      |      |      |      |      |      |      |
| Energy metabolism               |                                                                |                             |      |      |      |      |      |      |      |      |      |      |      |      |      |      |      |      |      |      |      |
| M00163                          | Photosystem I                                                  | 0                           | 0    | 16.7 | 0    | 0    | 0    | 0    | 0    | 0    | 0    | 0    | 0    | 0    | 0    | 0    | 0    | 0    | 0    | 0    |      |
| M00144                          | NADH:quinone oxidoreductase, prokaryotes                       | 78.6                        | 38.5 | 76.9 | 38.5 | 42.9 | 23.1 | 42.9 | 71.4 | 78.6 | 76.9 | 76.9 | 76.9 | 71.4 | 71.4 | 71.4 | 71.4 | 78.6 | 78.6 | 71.4 | 64.3 |
| M00145                          | NAD(P)H:quinone oxidoreductase, chloroplasts and cyanobacteria | 0                           | 0    | 0    | 0    | 0    | 0    | 0    | 9.1  | 0    | 0    | 0    | 0    | 9.1  | 0    | 0    | 0    | 9.1  | 0    | 0    | 0    |
| M00149                          | Succinate dehydrogenase, prokaryotes                           | 100                         | 0    | 75   | 0    | 0    | 0    | 0    | 100  | 50   | 75   | 75   | 100  | 75   | 100  | 75   | 100  | 75   | 100  | 100  | 0    |
| M00150                          | Fumarate reductase, prokaryotes                                | 0                           | 0    | 0    | 0    | 0    | 0    | 0    | 0    | 0    | 0    | 0    | 0    | 0    | 0    | 0    | 0    | 0    | 0    | 0    | 0    |
| M00162                          | Cytochrome b6f complex                                         | 0                           | 0    | 0    | 0    | 0    | 0    | 0    | 0    | 0    | 0    | 0    | 0    | 0    | 0    | 0    | 0    | 0    | 0    | 0    | 0    |
| M00151                          | Cytochrome bc1 complex respiratory unit                        | 0                           | 0    | 0    | 0    | 0    | 0    | 0    | 0    | 0    | 0    | 0    | 0    | 0    | 0    | 0    | 0    | 0    | 0    | 0    | 0    |
| M00152                          | Cytochrome bc1 complex                                         | 0                           | 0    | 0    | 0    | 0    | 0    | 0    | 0    | 0    | 0    | 0    | 0    | 0    | 0    | 0    | 0    | 0    | 0    | 0    | 0    |
| M00154                          | Cytochrome c oxidase                                           | 0                           | 0    | 0    | 0    | 0    | 0    | 0    | 0    | 0    | 0    | 0    | 0    | 0    | 0    | 0    | 0    | 0    | 0    | 0    | 0    |
| M00155                          | Cytochrome c oxidase, prokaryotes                              | 100                         | 0    | 0    | 0    | 0    | 0    | 0    | 0    | 0    | 0    | 66.7 | 0    | 0    | 66.7 | 0    | 0    | 0    | 0    | 0    | 0    |
| M00153                          | Cytochrome d ubiquinol oxidase                                 | 0                           | 0    | 0    | 0    | 0    | 0    | 0    | 50   | 0    | 0    | 0    | 50   | 50   | 50   | 50   | 50   | 50   | 50   | 50   | 0    |
| M00416                          | Cytochrome aa3-600 menaquinol oxidase                          | 0                           | 0    | 0    | 0    | 0    | 0    | 0    | 0    | 0    | 75   | 75   | 50   | 0    | 0    | 0    | 0    | 0    | 0    | 0    | 0    |
| M00157                          | F-type ATPase, prokaryotes and chloroplasts                    | 0                           | 0    | 0    | 0    | 0    | 0    | 0    | 0    | 0    | 0    | 0    | 0    | 0    | 0    | 0    | 0    | 0    | 0    | 0    | 0    |
| M00159                          | V-type ATPase, prokaryotes                                     | 87.5                        | 75   | 87.5 | 75   | 75   | 87.5 | 87.5 | 87.5 | 87.5 | 87.5 | 87.5 | 87.5 | 100  | 100  | 100  | 100  | 75   | 87.5 | 100  | 100  |
| Carbohydrate & lipid metabolism |                                                                |                             |      |      |      |      |      |      |      |      |      |      |      |      |      |      |      |      |      |      |      |
| M00310                          | Pyruvate:ferredoxin oxidoreductase                             | 0                           | 100  | 100  | 100  | 100  | 100  | 100  | 100  | 100  | 100  | 100  | 100  | 100  | 100  | 100  | 100  | 100  | 100  | 100  | 100  |
| M00311                          | 2-oxoglutarate:ferredoxin oxidoreductase                       | 50                          | 50   | 100  | 100  | 100  | 50   | 100  | 25   | 100  | 50   | 50   | 50   | 50   | 50   | 100  | 50   | 50   | 50   | 50   | 50   |
| M00312                          | 2-oxoisovalerate:ferredoxin oxidoreductase                     | 0                           | 0    | 0    | 0    | 0    | 0    | 0    | 0    | 0    | 0    | 0    | 0    | 0    | 0    | 0    | 0    | 0    | 0    | 0    | 0    |
| M00313                          | indolepyruvate:ferredoxin oxidoreductase                       | 0                           | 100  | 0    | 100  | 100  | 0    | 100  | 100  | 0    | 100  | 100  | 0    | 100  | 100  | 100  | 100  | 100  | 100  | 100  | 100  |
| M00072                          | Oligosaccharyltransferase                                      | 0                           | 16.7 | 16.7 | 16.7 | 16.7 | 16.7 | 16.7 | 16.7 | 16.7 | 16.7 | 16.7 | 16.7 | 16.7 | 16.7 | 16.7 | 16.7 | 16.7 | 16.7 | 16.7 | 16.7 |
| Genetic information processing  |                                                                |                             |      |      |      |      |      |      |      |      |      |      |      |      |      |      |      |      |      |      |      |
| M00260                          | DNA polymerase III complex, bacteria                           | 0                           | 0    | 0    | 0    | 0    | 0    | 0    | 0    | 0    | 0    | 0    | 0    | 0    | 0    | 0    | 0    | 0    | 0    | 0    | 0    |
| M00264                          | DNA polymerase II complex, archaea                             | 0                           | 0    | 0    | 0    | 0    | 0    | 0    | 0    | 0    | 0    | 0    | 0    | 0    | 0    | 0    | 0    | 0    | 0    | 0    | 0    |
| M00261                          | DNA polymerase alpha / primase complex                         | 25                          | 25   | 25   | 25   | 25   | 25   | 25   | 25   | 25   | 25   | 25   | 25   | 25   | 25   | 25   | 25   | 25   | 25   | 25   | 25   |
| M00288                          | RPA complex                                                    | 33.3                        | 33.3 | 33.3 | 33.3 | 33.3 | 33.3 | 33.3 | 33.3 | 0    | 33.3 | 33.3 | 33.3 | 0    | 0    | 0    | 0    | 33.3 | 33.3 | 33.3 | 33.3 |
| M00290                          | Holo-TFIIF complex                                             | 10                          | 0    | 10   | 0    | 0    | 10   | 0    | 10   | 10   | 10   | 10   | 10   | 10   | 10   | 10   | 10   | 10   | 0    | 10   | 0    |









| ID                                   | Module name                                                                     | Module completion ratio (%) |      |      |      |      |      |      |      |      |      |      |      |      |      |      |      |      |      |      |      |
|--------------------------------------|---------------------------------------------------------------------------------|-----------------------------|------|------|------|------|------|------|------|------|------|------|------|------|------|------|------|------|------|------|------|
|                                      |                                                                                 | ape                         | smr  | iho  | dmu  | tag  | iag  | thg  | hbu  | pfm  | sai  | mse  | aho  | pis  | cma  | tnn  | vdi  | tpe  | asc  | clg  | ffo  |
| Functional set                       |                                                                                 |                             |      |      |      |      |      |      |      |      |      |      |      |      |      |      |      |      |      |      |      |
| Metabolism                           |                                                                                 |                             |      |      |      |      |      |      |      |      |      |      |      |      |      |      |      |      |      |      |      |
| M00360                               | Aminoacyl-tRNA biosynthesis, prokaryotes                                        | 100                         | 100  | 100  | 100  | 100  | 100  | 100  | 100  | 100  | 100  | 100  | 100  | 100  | 100  | 94.4 | 100  | 100  | 100  | 100  | 100  |
| M00359                               | Aminoacyl-tRNA biosynthesis, eukaryotes                                         | 85                          | 90   | 85   | 90   | 90   | 90   | 95   | 85   | 85   | 90   | 90   | 90   | 95   | 95   | 90   | 90   | 90   | 95   | 95   | 95   |
| M00362                               | Nucleotide sugar biosynthesis, prokaryotes                                      | 28.6                        | 57.1 | 28.6 | 42.9 | 42.9 | 57.1 | 42.9 | 14.3 | 14.3 | 42.9 | 71.4 | 42.9 | 57.1 | 42.9 | 28.6 | 42.9 | 85.7 | 57.1 | 57.1 | 42.9 |
| M00361                               | Nucleotide sugar biosynthesis, eukaryotes                                       | 16.7                        | 33.3 | 16.7 | 33.3 | 33.3 | 33.3 | 33.3 | 0    | 0    | 33.3 | 66.7 | 33.3 | 66.7 | 33.3 | 33.3 | 33.3 | 66.7 | 33.3 | 33.3 | 33.3 |
| Environmental information processing |                                                                                 |                             |      |      |      |      |      |      |      |      |      |      |      |      |      |      |      |      |      |      |      |
| M00454                               | KdpD-KdpE (potassium transport) two-component regulatory system                 | 0                           | 0    | 0    | 0    | 0    | 0    | 0    | 0    | 0    | 0    | 0    | 0    | 0    | 0    | 0    | 0    | 0    | 0    | 0    | 0    |
| M00459                               | VicK-VicR (cell wall metabolism) two-component regulatory system                | 0                           | 0    | 0    | 0    | 0    | 0    | 0    | 0    | 0    | 0    | 0    | 0    | 0    | 0    | 0    | 0    | 0    | 0    | 0    | 0    |
| M00460                               | MprB-MprA (maintenance of persistent infection two-component regulatory system) | 0                           | 0    | 0    | 0    | 0    | 0    | 0    | 0    | 0    | 0    | 0    | 0    | 0    | 0    | 0    | 0    | 0    | 0    | 0    | 0    |
| M00506                               | CheA-CheYBV (chemotaxis) two-component regulatory system                        | 0                           | 0    | 0    | 0    | 0    | 0    | 0    | 0    | 0    | 0    | 0    | 0    | 0    | 0    | 0    | 0    | 0    | 0    | 0    | 0    |
| M00507                               | ChpA-ChpB/PilGH (chemosensory) two-component regulatory system                  | 0                           | 0    | 0    | 0    | 0    | 0    | 0    | 0    | 0    | 0    | 0    | 0    | 0    | 0    | 0    | 0    | 0    | 0    | 0    | 0    |
| M00511                               | PleC-PleD (cell fate control) two-component regulatory system                   | 0                           | 0    | 0    | 0    | 0    | 0    | 0    | 0    | 0    | 0    | 0    | 0    | 0    | 0    | 0    | 0    | 0    | 0    | 0    | 0    |
| M00520                               | ChvG-ChvI (acidity sensing) two-component regulatory system                     | 0                           | 0    | 0    | 0    | 0    | 0    | 0    | 0    | 0    | 0    | 0    | 0    | 0    | 0    | 0    | 0    | 0    | 0    | 0    | 0    |

Full species name of each abbreviation is described in Table S2.

**Table S3** Module completion patterns in 79 archaeal species listed in Table S2 (continued: Thaumarchaeota and other archaea).

| ID                | Module name                                                               | Module completion ratio (%) |      |      |      |     |      |
|-------------------|---------------------------------------------------------------------------|-----------------------------|------|------|------|-----|------|
|                   |                                                                           | nmr                         | csy  | nga  | csu  | neq | kcr  |
| Pathway module    |                                                                           |                             |      |      |      |     |      |
| Energy metabolism |                                                                           |                             |      |      |      |     |      |
| M00165            | Reductive pentose phosphate cycle (Calvin cycle)                          | 45.5                        | 45.5 | 45.5 | 27.3 | 0   | 27.3 |
| M00166            | Reductive pentose phosphate cycle, ribulose-5P => glyceraldehyde-3P       | 50                          | 50   | 50   | 50   | 0   | 50   |
| M00167            | Reductive pentose phosphate cycle, glyceraldehyde-3P => ribulose-5P       | 42.9                        | 42.9 | 42.9 | 14.3 | 0   | 14.3 |
| M00168            | CAM (Crassulacean acid metabolism), dark                                  | 50                          | 50   | 50   | 100  | 0   | 0    |
| M00169            | CAM (Crassulacean acid metabolism), light                                 | 50                          | 50   | 50   | 50   | 0   | 50   |
| M00172            | C4-dicarboxylic acid cycle, NADP - malic enzyme type                      | 25                          | 25   | 25   | 50   | 0   | 25   |
| M00171            | C4-dicarboxylic acid cycle, NAD - malic enzyme type                       | 14.3                        | 14.3 | 14.3 | 28.6 | 0   | 14.3 |
| M00170            | C4-dicarboxylic acid cycle, phosphoenolpyruvate carboxykinase type        | 25                          | 25   | 25   | 25   | 0   | 25   |
| M00173            | Reductive citrate cycle (Arnon-Buchanan cycle)                            | 63.6                        | 63.6 | 63.6 | 90.9 | 9.1 | 54.5 |
| M00376            | 3-Hydroxypropionate bi-cycle                                              | 18.8                        | 18.8 | 18.8 | 12.5 | 0   | 12.5 |
| M00375            | Hydroxypropionate-hydroxybutylate cycle                                   | 41.7                        | 41.7 | 41.7 | 16.7 | 0   | 16.7 |
| M00374            | Dicarboxylate-hydroxybutyrate cycle                                       | 46.2                        | 46.2 | 46.2 | 61.5 | 7.7 | 46.2 |
| M00377            | Reductive acetyl-CoA pathway (Wood-Ljungdahl pathway)                     | 14.3                        | 14.3 | 14.3 | 0    | 0   | 14.3 |
| M00579            | Phosphate acetyltransferase-acetate kinase pathway, acetyl-CoA => acetate | 0                           | 0    | 0    | 0    | 0   | 0    |
| M00175            | Nitrogen fixation, nitrogen => ammonia                                    | 0                           | 0    | 0    | 0    | 0   | 0    |
| M00531            | Assimilatory nitrate reduction, nitrate => ammonia                        | 0                           | 50   | 0    | 0    | 0   | 0    |
| M00530            | Dissimilatory nitrate reduction, nitrate => ammonia                       | 0                           | 0    | 0    | 0    | 0   | 0    |
| M00529            | Denitrification, nitrate => nitrogen                                      | 25                          | 0    | 25   | 25   | 0   | 0    |
| M00528            | Nitrification, ammonia => nitrite                                         | 50                          | 50   | 50   | 0    | 0   | 0    |
| M00567            | Methanogenesis, CO2 => methane                                            | 0                           | 0    | 0    | 12.5 | 0   | 12.5 |
| M00357            | Methanogenesis, acetate => methane                                        | 20                          | 0    | 20   | 20   | 0   | 20   |
| M00356            | Methanogenesis, methanol => methane                                       | 0                           | 0    | 0    | 0    | 0   | 33.3 |
| M00563            | Methanogenesis, mono-/di-/tri-methylamine => methane                      | 0                           | 0    | 0    | 0    | 0   | 25   |
| M00358            | Coenzyme M biosynthesis                                                   | 0                           | 0    | 0    | 0    | 0   | 0    |
| M00174            | Methane oxidation, methanotroph, methane => formaldehyde                  | 50                          | 50   | 50   | 0    | 0   | 0    |
| M00346            | Formaldehyde assimilation, serine pathway                                 | 33.3                        | 33.3 | 33.3 | 44.4 | 0   | 33.3 |

| ID                              | Module name                                                                              | Module completion ratio (%) |      |      |      |     |      |
|---------------------------------|------------------------------------------------------------------------------------------|-----------------------------|------|------|------|-----|------|
|                                 |                                                                                          | nmr                         | csy  | nga  | csu  | neq | kcr  |
| M00345                          | Formaldehyde assimilation, ribulose monophosphate pathway                                | 0                           | 0    | 0    | 0    | 0   | 33.3 |
| M00344                          | Formaldehyde assimilation, xylulose monophosphate pathway                                | 0                           | 0    | 0    | 0    | 0   | 0    |
| M00378                          | F420 biosynthesis                                                                        | 60                          | 60   | 60   | 60   | 0   | 20   |
| M00422                          | Acetyl-CoA pathway, CO2 => acetyl-CoA                                                    | 0                           | 0    | 0    | 0    | 0   | 0    |
| M00176                          | Assimilatory sulfate reduction, sulfate => H2S                                           | 100                         | 100  | 100  | 0    | 0   | 33.3 |
| M00596                          | Dissimilatory sulfate reduction, sulfate => H2S                                          | 33.3                        | 33.3 | 33.3 | 0    | 0   | 0    |
| Carbohydrate & lipid metabolism |                                                                                          |                             |      |      |      |     |      |
| M00001                          | Glycolysis (Embden-Meyerhof pathway), glucose => pyruvate                                | 70                          | 70   | 60   | 90   | 0   | 80   |
| M00002                          | Glycolysis, core module involving three-carbon compounds                                 | 83.3                        | 83.3 | 83.3 | 100  | 0   | 100  |
| M00003                          | Gluconeogenesis, oxaloacetate => fructose-6P                                             | 100                         | 100  | 100  | 85.7 | 0   | 100  |
| M00307                          | Pyruvate oxidation, pyruvate => acetyl-CoA                                               | 0                           | 0    | 0    | 100  | 0   | 100  |
| M00009                          | Citrate cycle (TCA cycle, Krebs cycle)                                                   | 75                          | 75   | 75   | 87.5 | 0   | 62.5 |
| M00010                          | Citrate cycle, first carbon oxidation, oxaloacetate => 2-oxoglutarate                    | 100                         | 100  | 100  | 100  | 0   | 33.3 |
| M00011                          | Citrate cycle, second carbon oxidation, 2-oxoglutarate => oxaloacetate                   | 60                          | 60   | 60   | 80   | 0   | 80   |
| M00004                          | Pentose phosphate pathway (Pentose phosphate cycle)                                      | 57.1                        | 57.1 | 57.1 | 42.9 | 0   | 28.6 |
| M00006                          | Pentose phosphate pathway, oxidative phase, glucose 6P => ribulose 5P                    | 0                           | 0    | 50   | 50   | 0   | 0    |
| M00007                          | Pentose phosphate pathway, non-oxidative phase, fructose 6P => ribose 5P                 | 75                          | 75   | 75   | 25   | 0   | 25   |
| M00580                          | Pentose phosphate pathway, archaea, fructose 6P => ribose 5P                             | 50                          | 50   | 50   | 50   | 0   | 100  |
| M00005                          | PRPP biosynthesis, ribose 5P => PRPP                                                     | 100                         | 100  | 100  | 100  | 0   | 100  |
| M00008                          | Entner-Doudoroff pathway, glucose-6P => glyceraldehyde-3P + pyruvate                     | 0                           | 0    | 0    | 0    | 0   | 0    |
| M00308                          | Semi-phosphorylative Entner-Doudoroff pathway, gluconate => glyceraldehyde-3P + pyruvate | 20                          | 20   | 20   | 25   | 0   | 20   |
| M00633                          | Semi-phosphorylative Entner-Doudoroff pathway, gluconate/galactonate => glycerate-3P     | 0                           | 0    | 0    | 50   | 0   | 0    |
| M00309                          | Non-phosphorylative Entner-Doudoroff pathway, gluconate => glyceraldehyde + pyruvate     | 0                           | 0    | 0    | 33.3 | 0   | 33.3 |
| M00012                          | Glyoxylate cycle                                                                         | 60                          | 60   | 60   | 100  | 0   | 0    |
| M00373                          | Ethylmalonyl pathway                                                                     | 21.4                        | 21.4 | 21.4 | 7.1  | 0   | 7.1  |
| M00532                          | Photorespiration                                                                         | 10                          | 10   | 10   | 20   | 10  | 20   |
| M00013                          | Malonate semialdehyde pathway, propanoyl-CoA => Acetyl-CoA                               | 0                           | 0    | 0    | 25   | 0   | 50   |
| M00632                          | Galactose degradation, Leloir pathway, galactose => alpha-D-glucose-1P                   | 50                          | 50   | 50   | 25   | 0   | 25   |

| ID     | Module name                                                                               | Module completion ratio (%) |      |      |      |     |      |
|--------|-------------------------------------------------------------------------------------------|-----------------------------|------|------|------|-----|------|
|        |                                                                                           | nmr                         | csy  | nga  | csu  | neq | kcr  |
| M00552 | D-galactonate degradation, De Ley-Doudoroff pathway, D-galactonate => glycerate-3P        | 20                          | 20   | 20   | 20   | 0   | 20   |
| M00014 | Glucuronate pathway (uronate pathway)                                                     | 0                           | 0    | 0    | 28.6 | 0   | 0    |
| M00631 | D-Galacturonate degradation (bacteria), D-galacturonate => pyruvate + D-glyceraldehyde 3P | 0                           | 0    | 0    | 0    | 0   | 0    |
| M00061 | Uronic acid metabolism                                                                    | 0                           | 0    | 0    | 0    | 0   | 0    |
| M00081 | Pectin degradation                                                                        | 0                           | 0    | 0    | 0    | 0   | 0    |
| M00082 | Fatty acid biosynthesis, initiation                                                       | 0                           | 0    | 0    | 0    | 0   | 0    |
| M00113 | Jasmonic acid biosynthesis                                                                | 0                           | 0    | 0    | 0    | 0   | 0    |
| M00086 | beta-Oxidation, acyl-CoA synthesis                                                        | 100                         | 0    | 0    | 100  | 0   | 0    |
| M00087 | beta-Oxidation                                                                            | 0                           | 0    | 0    | 0    | 0   | 33.3 |
| M00088 | Ketone body biosynthesis, acetyl-CoA => acetoacetate/3-hydroxybutyrate/acetone            | 40                          | 40   | 40   | 40   | 0   | 40   |
| M00093 | Phosphatidylethanolamine (PE) biosynthesis, PA => PS => PE                                | 0                           | 0    | 0    | 0    | 0   | 0    |
| M00131 | Inositol phosphate metabolism, Ins(1,3,4,5)P4 => Ins(1,3,4)P3 => myo-inositol             | 25                          | 25   | 25   | 0    | 0   | 25   |
| M00094 | Ceramide biosynthesis                                                                     | 0                           | 0    | 0    | 0    | 0   | 0    |
| M00099 | Sphingosine biosynthesis                                                                  | 0                           | 0    | 0    | 0    | 0   | 0    |
| M00060 | Lipopolysaccharide biosynthesis, KDO2-lipid A                                             | 0                           | 0    | 0    | 0    | 0   | 0    |
| M00064 | ADP-L-glycero-D-manno-heptose biosynthesis                                                | 0                           | 0    | 0    | 0    | 0   | 0    |
| M00080 | Lipopolysaccharide biosynthesis, inner core => outer core => O-antigen                    | 0                           | 0    | 0    | 0    | 0   | 0    |
| M00549 | Nucleotide sugar biosynthesis, glucose => UDP-glucose                                     | 33.3                        | 33.3 | 33.3 | 66.7 | 0   | 0    |
| M00554 | Nucleotide sugar biosynthesis, galactose => UDP-galactose                                 | 50                          | 50   | 50   | 0    | 0   | 0    |
| M00565 | Trehalose biosynthesis, D-glucose 1P => trehalose                                         | 0                           | 0    | 0    | 0    | 0   | 0    |
| M00055 | N-glycan precursor biosynthesis                                                           | 7.7                         | 7.7  | 7.7  | 7.7  | 7.7 | 7.7  |
| M00076 | Dermatan sulfate degradation                                                              | 0                           | 0    | 0    | 0    | 0   | 0    |
| M00077 | Chondroitin sulfate degradation                                                           | 0                           | 0    | 0    | 0    | 0   | 0    |
| M00078 | Heparan sulfate degradation                                                               | 0                           | 0    | 0    | 0    | 0   | 0    |
| M00095 | C5 isoprenoid biosynthesis, mevalonate pathway                                            | 57.1                        | 57.1 | 57.1 | 57.1 | 0   | 57.1 |
| M00096 | C5 isoprenoid biosynthesis, non-mevalonate pathway                                        | 12.5                        | 12.5 | 12.5 | 12.5 | 0   | 12.5 |
| M00364 | C10-C20 isoprenoid biosynthesis, bacteria                                                 | 100                         | 100  | 100  | 100  | 0   | 100  |
| M00365 | C10-C20 isoprenoid biosynthesis, archaea                                                  | 100                         | 100  | 100  | 100  | 0   | 100  |



| ID     | Module name                                                                                            | Module completion ratio (%) |      |      |      |      |      |
|--------|--------------------------------------------------------------------------------------------------------|-----------------------------|------|------|------|------|------|
|        |                                                                                                        | nmr                         | csy  | nga  | csu  | neq  | kcr  |
| M00016 | Lysine biosynthesis, succinyl-DAP pathway, aspartate => lysine                                         | 22.2                        | 22.2 | 33.3 | 33.3 | 11.1 | 55.6 |
| M00525 | Lysine biosynthesis, acetyl-DAP pathway, aspartate => lysine                                           | 22.2                        | 22.2 | 33.3 | 33.3 | 0    | 44.4 |
| M00526 | Lysine biosynthesis, DAP dehydrogenase pathway, aspartate => lysine                                    | 33.3                        | 33.3 | 50   | 50   | 0    | 66.7 |
| M00527 | Lysine biosynthesis, DAP aminotransferase pathway, aspartate => lysine                                 | 28.6                        | 28.6 | 42.9 | 42.9 | 0    | 57.1 |
| M00030 | Lysine biosynthesis, AAA pathway, 2-oxoglutarate => 2-aminoadipate => lysine                           | 0                           | 0    | 0    | 12.5 | 0    | 0    |
| M00433 | Lysine biosynthesis, 2-oxoglutarate => 2-oxoadipate                                                    | 0                           | 0    | 0    | 0    | 0    | 0    |
| M00031 | Lysine biosynthesis, 2-aminoadipate => lysine                                                          | 100                         | 100  | 80   | 100  | 0    | 100  |
| M00032 | Lysine degradation, lysine => saccharopine => acetoacetyl-CoA                                          | 0                           | 0    | 0    | 12.5 | 0    | 0    |
| M00608 | 2-oxocarboxylic acid chain extension, 2-oxoglutarate => 2-oxoadipate => 2-oxopimelate => 2-oxosuberate | 0                           | 0    | 0    | 0    | 0    | 0    |
| M00015 | Proline biosynthesis, glutamate => proline                                                             | 0                           | 0    | 0    | 0    | 0    | 50   |
| M00028 | Ornithine biosynthesis, glutamate => ornithine                                                         | 60                          | 60   | 40   | 80   | 0    | 80   |
| M00029 | Urea cycle                                                                                             | 60                          | 60   | 60   | 60   | 0    | 60   |
| M00026 | Histidine biosynthesis, PRPP => histidine                                                              | 75                          | 75   | 77.8 | 77.8 | 0    | 0    |
| M00045 | Histidine degradation, histidine => N-formiminoglutamate => glutamate                                  | 25                          | 0    | 0    | 0    | 0    | 0    |
| M00022 | Shikimate pathway, phosphoenolpyruvate + erythrose-4P => chorismate                                    | 71.4                        | 71.4 | 71.4 | 71.4 | 0    | 71.4 |
| M00023 | Tryptophan biosynthesis, chorismate => tryptophan                                                      | 80                          | 80   | 80   | 80   | 0    | 0    |
| M00024 | Phenylalanine biosynthesis, chorismate => phenylalanine                                                | 33.3                        | 33.3 | 33.3 | 33.3 | 50   | 50   |
| M00025 | Tyrosine biosynthesis, chorismate => tyrosine                                                          | 33.3                        | 33.3 | 33.3 | 33.3 | 33.3 | 66.7 |
| M00042 | Catecholamine biosynthesis, tyrosine => dopamine => noradrenaline => adrenaline                        | 0                           | 0    | 0    | 0    | 0    | 0    |
| M00044 | Tyrosine degradation, tyrosine => homogentisate                                                        | 0                           | 0    | 0    | 0    | 0    | 0    |
| M00038 | Tryptophan metabolism, tryptophan => kynurenine => 2-aminomuconate                                     | 0                           | 0    | 14.3 | 0    | 0    | 0    |
| M00027 | GABA (gamma-Aminobutyrate) shunt                                                                       | 33.3                        | 0    | 66.7 | 33.3 | 0    | 33.3 |
| M00127 | Thiamine biosynthesis, AIR => thiamine-P/thiamine-2P                                                   | 60                          | 60   | 60   | 60   | 0    | 40   |
| M00125 | Riboflavin biosynthesis, GTP => riboflavin/FMN/FAD                                                     | 50                          | 50   | 50   | 0    | 0    | 16.7 |
| M00124 | Pyridoxal biosynthesis, erythrose-4P => pyridoxal-5P                                                   | 0                           | 0    | 0    | 0    | 0    | 16.7 |
| M00115 | NAD biosynthesis, aspartate => NAD                                                                     | 60                          | 60   | 60   | 20   | 0    | 20   |
| M00622 | Nicotinate degradation, nicotinate => fumarate                                                         | 0                           | 0    | 0    | 16.7 | 0    | 0    |
| M00119 | Pantothenate biosynthesis, valine/L-aspartate => pantothenate                                          | 40                          | 40   | 40   | 20   | 20   | 0    |

| ID                   | Module name                                                                      | Module completion ratio (%) |      |      |      |      |      |
|----------------------|----------------------------------------------------------------------------------|-----------------------------|------|------|------|------|------|
|                      |                                                                                  | nmr                         | csy  | nga  | csu  | neq  | kcr  |
| M00120               | Coenzyme A biosynthesis, pantothenate => CoA                                     | 50                          | 50   | 50   | 25   | 0    | 50   |
| M00572               | Pimeloyl-ACP biosynthesis, BioC-BioH pathway, malonyl-ACP => pimeloyl-ACP        | 16.7                        | 16.7 | 16.7 | 16.7 | 16.7 | 16.7 |
| M00123               | Biotin biosynthesis, pimeloyl-ACP/CoA => biotin                                  | 75                          | 75   | 75   | 0    | 0    | 25   |
| M00573               | Biotin biosynthesis, BioI pathway, long-chain-acyl-ACP => pimeloyl-ACP => biotin | 60                          | 60   | 60   | 0    | 0    | 20   |
| M00577               | Biotin biosynthesis, BioW pathway, pimelate => pimeloyl-CoA => biotin            | 60                          | 60   | 60   | 0    | 0    | 20   |
| M00126               | Tetrahydrofolate biosynthesis, GTP => THF                                        | 33.3                        | 33.3 | 33.3 | 0    | 0    | 16.7 |
| M00121               | Heme biosynthesis, glutamate => protoheme/siroheme                               | 54.5                        | 54.5 | 54.5 | 18.2 | 9.1  | 18.2 |
| M00129               | Ascorbate biosynthesis, animals, glucose-1P => ascorbate                         | 0                           | 0    | 0    | 33.3 | 0    | 0    |
| M00114               | Ascorbate biosynthesis, plants, glucose-6P => ascorbate                          | 37.5                        | 37.5 | 25   | 37.5 | 0    | 44.4 |
| M00550               | Ascorbate degradation, ascorbate => D-xylulose-5P                                | 0                           | 0    | 0    | 0    | 0    | 0    |
| M00122               | Cobalamin biosynthesis, cobinamide => cobalamin                                  | 50                          | 50   | 50   | 0    | 0    | 12.5 |
| M00117               | Ubiquinone biosynthesis, prokaryotes, chorismate => ubiquinone                   | 22.2                        | 22.2 | 33.3 | 11.1 | 0    | 33.3 |
| M00116               | Menaquinone biosynthesis, chorismate => menaquinone                              | 22.2                        | 22.2 | 22.2 | 11.1 | 0    | 22.2 |
| M00118               | Glutathione biosynthesis, glutamate => glutathione                               | 0                           | 0    | 0    | 0    | 0    | 0    |
| M00140               | C1-unit interconversion, prokaryotes                                             | 66.7                        | 66.7 | 66.7 | 33.3 | 0    | 33.3 |
| M00141               | C1-unit interconversion, eukaryotes                                              | 50                          | 50   | 50   | 50   | 0    | 50   |
| M00133               | Polyamine biosynthesis, arginine => agmatine => putrescine => spermidine         | 50                          | 50   | 50   | 75   | 25   | 75   |
| M00134               | Polyamine biosynthesis, arginine => ornithine => putrescine                      | 0                           | 0    | 0    | 0    | 0    | 50   |
| M00135               | GABA biosynthesis, eukaryotes, putrescine => GABA                                | 0                           | 0    | 0    | 33.3 | 0    | 0    |
| M00039               | Lignin biosynthesis, cinnamate => lignin                                         | 0                           | 0    | 0    | 0    | 0    | 0    |
| M00033               | Ectoine biosynthesis, aspartate => ectoine                                       | 100                         | 40   | 40   | 40   | 0    | 40   |
| Secondary metabolism |                                                                                  |                             |      |      |      |      |      |
| M00569               | Catechol meta-cleavage, catechol => pyruvate + acetaldehyde                      | 33.3                        | 16.7 | 16.7 | 0    | 0    | 16.7 |
| M00541               | Benzoyl-CoA degradation, benzoyl-CoA => 3-hydroxypimeloyl-CoA                    | 0                           | 0    | 0    | 0    | 0    | 0    |
| M00540               | Benzoate degradation, cyclohexanecarboxylic acid => pimeloyl-CoA                 | 0                           | 0    | 0    | 0    | 0    | 0    |
| M00623               | Phthalate degradation, phthalate => protocatechuate                              | 0                           | 0    | 0    | 0    | 0    | 0    |

| ID                              | Module name                                                    | Module completion ratio (%) |      |      |      |      |      |
|---------------------------------|----------------------------------------------------------------|-----------------------------|------|------|------|------|------|
|                                 |                                                                | nmr                         | csy  | nga  | csu  | neq  | kcr  |
| Structural complex              |                                                                |                             |      |      |      |      |      |
| Energy metabolism               |                                                                |                             |      |      |      |      |      |
| M00163                          | Photosystem I                                                  | 0                           | 0    | 0    | 0    | 0    | 0    |
| M00144                          | NADH:quinone oxidoreductase, prokaryotes                       | 64.3                        | 71.4 | 71.4 | 57.1 | 0    | 71.4 |
| M00145                          | NAD(P)H:quinone oxidoreductase, chloroplasts and cyanobacteria | 0                           | 9.1  | 0    | 0    | 0    | 0    |
| M00149                          | Succinate dehydrogenase, prokaryotes                           | 100                         | 100  | 100  | 100  | 0    | 100  |
| M00150                          | Fumarate reductase, prokaryotes                                | 0                           | 25   | 0    | 0    | 0    | 0    |
| M00162                          | Cytochrome b6f complex                                         | 0                           | 0    | 0    | 12.5 | 0    | 0    |
| M00151                          | Cytochrome bc1 complex respiratory unit                        | 33.3                        | 33.3 | 0    | 0    | 0    | 0    |
| M00152                          | Cytochrome bc1 complex                                         | 10                          | 10   | 0    | 0    | 0    | 0    |
| M00154                          | Cytochrome c oxidase                                           | 6.7                         | 6.7  | 6.7  | 6.7  | 0    | 0    |
| M00155                          | Cytochrome c oxidase, prokaryotes                              | 66.7                        | 66.7 | 66.7 | 66.7 | 0    | 0    |
| M00153                          | Cytochrome d ubiquinol oxidase                                 | 0                           | 0    | 0    | 0    | 0    | 50   |
| M00416                          | Cytochrome aa3-600 menaquinol oxidase                          | 0                           | 0    | 0    | 25   | 0    | 0    |
| M00157                          | F-type ATPase, prokaryotes and chloroplasts                    | 0                           | 0    | 0    | 0    | 0    | 0    |
| M00159                          | V-type ATPase, prokaryotes                                     | 100                         | 100  | 100  | 87.5 | 62.5 | 100  |
| Carbohydrate & lipid metabolism |                                                                |                             |      |      |      |      |      |
| M00310                          | Pyruvate:ferredoxin oxidoreductase                             | 0                           | 0    | 0    | 100  | 0    | 100  |
| M00311                          | 2-oxoglutarate:ferredoxin oxidoreductase                       | 50                          | 50   | 50   | 50   | 0    | 100  |
| M00312                          | 2-oxoisovalerate:ferredoxin oxidoreductase                     | 0                           | 0    | 0    | 0    | 0    | 0    |
| M00313                          | indolepyruvate:ferredoxin oxidoreductase                       | 0                           | 0    | 0    | 0    | 0    | 100  |
| M00072                          | Oligosaccharyltransferase                                      | 16.7                        | 16.7 | 0    | 16.7 | 16.7 | 16.7 |
| Genetic information processing  |                                                                |                             |      |      |      |      |      |
| M00260                          | DNA polymerase III complex, bacteria                           | 0                           | 0    | 0    | 0    | 0    | 0    |
| M00264                          | DNA polymerase II complex, archaea                             | 100                         | 100  | 100  | 100  | 100  | 100  |
| M00261                          | DNA polymerase alpha / primase complex                         | 25                          | 25   | 25   | 25   | 0    | 25   |
| M00288                          | RPA complex                                                    | 33.3                        | 33.3 | 33.3 | 33.3 | 33.3 | 33.3 |
| M00290                          | Holo-TFIIF complex                                             | 0                           | 0    | 10   | 0    | 0    | 10   |



| ID                                   | Module name                                     | Module completion ratio (%) |      |      |      |      |      |
|--------------------------------------|-------------------------------------------------|-----------------------------|------|------|------|------|------|
|                                      |                                                 | nmr                         | csy  | nga  | csu  | neq  | kcr  |
| M00413                               | FA core complex                                 | 10                          | 10   | 10   | 10   | 10   | 0    |
| M00184                               | RNA polymerase, archaea                         | 83.3                        | 83.3 | 83.3 | 75   | 100  | 83.3 |
| M00180                               | RNA polymerase II, eukaryotes                   | 8.3                         | 8.3  | 0    | 0    | 0    | 0    |
| M00181                               | RNA polymerase III, eukaryotes                  | 6.2                         | 6.2  | 0    | 0    | 0    | 0    |
| M00182                               | RNA polymerase I, eukaryotes                    | 8.3                         | 8.3  | 0    | 0    | 0    | 0    |
| M00425                               | H/ACA ribonucleoprotein complex                 | 50                          | 25   | 50   | 25   | 50   | 25   |
| M00390                               | Exosome, archaea                                | 100                         | 100  | 100  | 100  | 100  | 100  |
| M00391                               | Exosome, eukaryotes                             | 40                          | 30   | 40   | 40   | 30   | 40   |
| M00392                               | Ski complex                                     | 0                           | 0    | 0    | 0    | 0    | 0    |
| M00394                               | RNA degradosome                                 | 25                          | 25   | 25   | 25   | 0    | 25   |
| M00178                               | Ribosome, bacteria                              | 59.6                        | 55.8 | 57.7 | 59.6 | 59.6 | 59.6 |
| M00179                               | Ribosome, archaea                               | 94.9                        | 88.1 | 91.5 | 94.9 | 94.9 | 96.6 |
| M00177                               | Ribosome, eukaryotes                            | 34.2                        | 30.4 | 34.2 | 35.4 | 34.2 | 39.2 |
| M00341                               | Proteasome, 19S regulatory particle (PA700)     | 0                           | 0    | 0    | 5.3  | 0    | 0    |
| M00342                               | Bacterial proteasome                            | 50                          | 50   | 50   | 50   | 50   | 50   |
| M00343                               | Archaeal proteasome                             | 66.7                        | 66.7 | 66.7 | 66.7 | 100  | 66.7 |
| M00401                               | Sec61 complex                                   | 33.3                        | 33.3 | 0    | 0    | 33.3 | 0    |
| Environmental information processing |                                                 |                             |      |      |      |      |      |
| M00189                               | Molybdate transport system                      | 0                           | 0    | 0    | 0    | 0    | 0    |
| M00423                               | Molybdate/tungstate transport system            | 0                           | 0    | 0    | 66.7 | 0    | 100  |
| M00186                               | Tungstate transport system                      | 0                           | 0    | 0    | 0    | 0    | 0    |
| M00188                               | NitT/TauT family transport system               | 100                         | 100  | 100  | 100  | 0    | 100  |
| M00190                               | Iron(III) transport system                      | 0                           | 0    | 0    | 66.7 | 0    | 0    |
| M00191                               | Thiamine transport system                       | 0                           | 0    | 0    | 0    | 0    | 0    |
| M00299                               | Spermidine/putrescine transport system          | 0                           | 0    | 0    | 75   | 0    | 0    |
| M00193                               | Putative spermidine/putrescine transport system | 0                           | 0    | 0    | 0    | 0    | 0    |
| M00208                               | Glycine betaine/proline transport system        | 0                           | 0    | 0    | 0    | 0    | 0    |
| M00209                               | Osmoprotectant transport system                 | 0                           | 0    | 0    | 0    | 0    | 0    |

| ID     | Module name                                                     | Module completion ratio (%) |      |      |      |     |     |
|--------|-----------------------------------------------------------------|-----------------------------|------|------|------|-----|-----|
|        |                                                                 | nmr                         | csy  | nga  | csu  | neq | kcr |
| M00194 | Maltose/maltodextrin transport system                           | 0                           | 0    | 0    | 25   | 0   | 0   |
| M00196 | Multiple sugar transport system                                 | 0                           | 0    | 0    | 25   | 0   | 0   |
| M00203 | Glucose/arabinose transport system                              | 0                           | 0    | 0    | 0    | 0   | 0   |
| M00605 | Glucose/mannose transport system                                | 0                           | 0    | 0    | 25   | 0   | 0   |
| M00604 | Trehalose transport system                                      | 0                           | 0    | 0    | 0    | 0   | 0   |
| M00206 | Cellobiose transport system                                     | 0                           | 0    | 0    | 25   | 0   | 0   |
| M00606 | N,N'-Diacetylchitobiose transport system                        | 0                           | 0    | 0    | 25   | 0   | 0   |
| M00212 | Ribose transport system                                         | 0                           | 0    | 0    | 0    | 0   | 0   |
| M00599 | Inositol-phosphate transport system                             | 0                           | 0    | 0    | 0    | 0   | 0   |
| M00197 | Putative fructooligosaccharide transport system                 | 0                           | 0    | 0    | 25   | 0   | 0   |
| M00198 | Putative sn-glycerol-phosphate transport system                 | 0                           | 0    | 0    | 0    | 0   | 0   |
| M00200 | Putative sorbitol/mannitol transport system                     | 0                           | 0    | 0    | 25   | 0   | 0   |
| M00602 | Arabinosaccharide transport system                              | 0                           | 0    | 0    | 25   | 0   | 0   |
| M00491 | arabinogalactan oligomer/maltoooligosaccharide transport system | 0                           | 0    | 0    | 25   | 0   | 0   |
| M00207 | Putative multiple sugar transport system                        | 0                           | 0    | 0    | 100  | 0   | 0   |
| M00221 | Putative simple sugar transport system                          | 0                           | 0    | 0    | 100  | 0   | 100 |
| M00211 | Putative ABC transport system (Saccharide and polyol_2)         | 0                           | 0    | 0    | 0    | 0   | 0   |
| M00222 | Phosphate transport system                                      | 100                         | 100  | 100  | 100  | 0   | 100 |
| M00223 | Phosphonate transport system                                    | 100                         | 100  | 0    | 100  | 0   | 0   |
| M00237 | Branched-chain amino acid transport system                      | 0                           | 100  | 0    | 100  | 0   | 100 |
| M00236 | Putative polar amino acid transport system                      | 0                           | 0    | 0    | 0    | 0   | 100 |
| M00439 | Oligopeptide transport system                                   | 0                           | 0    | 0    | 0    | 0   | 0   |
| M00239 | Peptides/nickel transport system                                | 100                         | 80   | 80   | 60   | 0   | 80  |
| M00240 | Iron complex transport system                                   | 33.3                        | 33.3 | 33.3 | 100  | 0   | 0   |
| M00242 | Zinc transport system                                           | 100                         | 66.7 | 100  | 100  | 0   | 0   |
| M00318 | Iron/zinc/copper transport system                               | 0                           | 0    | 0    | 33.3 | 0   | 0   |
| M00317 | Manganese/iron transport system                                 | 0                           | 0    | 0    | 25   | 0   | 0   |
| M00319 | Manganese/zinc/iron transport system                            | 100                         | 0    | 0    | 25   | 0   | 0   |

| ID     | Module name                                  | Module completion ratio (%) |      |      |     |      |     |
|--------|----------------------------------------------|-----------------------------|------|------|-----|------|-----|
|        |                                              | nmr                         | csy  | nga  | csu | neq  | kcr |
| M00243 | Manganese/iron transport system              | 0                           | 0    | 33.3 | 0   | 0    | 0   |
| M00245 | Cobalt/nickel transport system               | 0                           | 0    | 0    | 0   | 0    | 100 |
| M00246 | Nickel transport system                      | 0                           | 0    | 0    | 0   | 0    | 100 |
| M00581 | Biotin transport system                      | 0                           | 0    | 0    | 0   | 0    | 0   |
| M00582 | Energy-coupling factor transport system      | 0                           | 0    | 0    | 100 | 0    | 100 |
| M00244 | Putative zinc/manganese transport system     | 0                           | 0    | 0    | 0   | 0    | 100 |
| M00298 | Multidrug/hemolysin transport system         | 0                           | 0    | 0    | 0   | 0    | 0   |
| M00250 | Lipopolysaccharide transport system          | 0                           | 0    | 0    | 0   | 0    | 0   |
| M00320 | Lipopolysaccharide export system             | 0                           | 0    | 0    | 0   | 0    | 0   |
| M00252 | Lipooligosaccharide transport system         | 0                           | 0    | 0    | 0   | 0    | 0   |
| M00224 | Fluoroquinolones transport system            | 0                           | 0    | 0    | 0   | 0    | 0   |
| M00255 | Lipoprotein-releasing system                 | 100                         | 100  | 0    | 0   | 0    | 0   |
| M00259 | Heme transport system                        | 0                           | 0    | 0    | 0   | 0    | 0   |
| M00258 | Uncharacterized ABC transport system_2       | 0                           | 0    | 100  | 100 | 100  | 100 |
| M00254 | Uncharacterized ABC transport system_3       | 100                         | 100  | 100  | 100 | 0    | 100 |
| M00273 | PTS system, fructose-specific II component   | 0                           | 0    | 0    | 0   | 0    | 0   |
| M00279 | PTS system, galactitol-specific II component | 0                           | 0    | 0    | 0   | 0    | 0   |
| M00276 | PTS system, mannose-specific II component    | 0                           | 0    | 0    | 0   | 0    | 0   |
| M00334 | Type VI secretion system                     | 0                           | 0    | 20   | 0   | 0    | 0   |
| M00335 | Sec (secretion) system                       | 25                          | 12.5 | 25   | 25  | 33.3 | 25  |

| ID                                   | Module name                                                                    | Module completion ratio (%) |      |      |      |     |      |
|--------------------------------------|--------------------------------------------------------------------------------|-----------------------------|------|------|------|-----|------|
|                                      |                                                                                | nmr                         | csy  | nga  | csu  | neq | kcr  |
| Functional set                       |                                                                                |                             |      |      |      |     |      |
| Metabolism                           |                                                                                |                             |      |      |      |     |      |
| M00360                               | Aminoacyl-tRNA biosynthesis, prokaryotes                                       | 100                         | 100  | 100  | 100  | 100 | 94.4 |
| M00359                               | Aminoacyl-tRNA biosynthesis, eukaryotes                                        | 85                          | 85   | 90   | 90   | 85  | 85   |
| M00362                               | Nucleotide sugar biosynthesis, prokaryotes                                     | 42.9                        | 57.1 | 71.4 | 71.4 | 0   | 57.1 |
| M00361                               | Nucleotide sugar biosynthesis, eukaryotes                                      | 33.3                        | 33.3 | 33.3 | 66.7 | 0   | 16.7 |
| Environmental information processing |                                                                                |                             |      |      |      |     |      |
| M00454                               | KdpD-KdpE (potassium transport) two-component regulatory system                | 0                           | 0    | 0    | 0    | 0   | 0    |
| M00459                               | VicK-VicR (cell wall metabolism) two-component regulatory system               | 0                           | 0    | 0    | 0    | 0   | 0    |
| M00460                               | MprB-MprA (maintenance of persistent infection two-component regulatory system | 0                           | 0    | 0    | 0    | 0   | 0    |
| M00506                               | CheA-CheYBV (chemotaxis) two-component regulatory system                       | 20                          | 0    | 60   | 0    | 0   | 0    |
| M00507                               | ChpA-ChpB/PilGH (chemosensory) two-component regulatory system                 | 0                           | 0    | 0    | 0    | 0   | 0    |
| M00511                               | PleC-PleD (cell fate control) two-component regulatory system                  | 0                           | 0    | 0    | 0    | 0   | 0    |
| M00520                               | ChvG-ChvI (acidity sensing) two-component regulatory system                    | 0                           | 0    | 50   | 0    | 0   | 0    |

Full species name of each abbreviation is described in Table S2.
